# Supplementary material for: Metabolomic and Proteomic Profiling of Porcine Intestinal Epithelial Cells Infected with Porcine Epidemic Diarrhea Virus
Source: Int J Mol Sci. 2023 Mar 7;24(6):5071. doi: 10.3390/ijms24065071 (PMC10049511; doi:10.3390/ijms24065071)
Supplement: Supplementary file 1 [file ijms-24-05071-s001.zip › Supplementary Tables.xlsx]

## Sheet: Table S1
Table S1. Differential metabolites in positive and negative mode between the PEDV-infected and uninfected groups
Compound.ID	Ratio	P value	P value_corrected	VIP	Name	Formula	HMDB.ID	Label	Mode
8.686_458.3725	24.5742	0.0004	0.0016	2.5025		C26H46N6O		up	positive
8.429_418.341	24.4176	0.0006	0.0022	2.4253		C23H42N6O		up	positive
0.653_238.0988	23.96	0	0	2.8737	Hepes	C8H18N2O4S	HMDB0062295	up	positive
0.639_260.0807	17.2196	0	0	2.7258	2,3,4,9-tetrahydro-1h-beta-carboline-1,3-dicarboxylic acid	C13H12N2O4	HMDB0032102	up	positive
4.751_159.0897	13.0334	0.0037	0.0101	1.8482	N-acetylvaline	C7H13NO3	HMDB0011757	up	positive
2.486_96.0689	10.4363	0.0013	0.0042	1.9408		C5H8N2		up	positive
9.889_464.3633	6.8333	0	0	2.1831		C32H48O2		up	positive
0.615_425.815	6.5501	0.0001	0.0008	2.0694		C6H2ClO12P3S		up	positive
0.615_357.8276	6.3649	0	0.0004	2.0178		C3H2ClO10P3S		up	positive
0.616_765.7529	6.131	0.0001	0.0005	2.081		C20H5N2O15P3S5		up	positive
0.616_289.8399	5.7449	0.0001	0.0005	2.0323				up	positive
0.615_697.765	5.6885	0	0.0003	1.999		C10H9N2O18P3S5		up	positive
0.615_561.7899	5.5101	0.0001	0.0009	1.9522		C7H2ClN2O18P3S		up	positive
0.839_190.0413	5.4733	0	0.0003	1.9493		C6H10N2O3S		up	positive
0.617_493.8027	5.4694	0.0002	0.0012	1.9692		C4H2ClN2O16P3S		up	positive
0.614_629.7775	5.4343	0.0002	0.0011	1.9816		C9H2ClN4O17P3S2		up	positive
0.646_295.0586	5.0142	0	0.0001	1.9658		C7H15N5O4P2		up	positive
9.726_482.374	4.9853	0	0	1.8999	(1r,3s,5z)-5-[(2e)-2-{(1r,3as,7ar)-1-[(2r,3e,5e)-7-hydroxy-7-propyl-3,5-decadien-2-yl]-7a-methyloctahydro-4h-inden-4-ylidene}ethylidene]-4-methylene-1,3-cyclohexanediol	C32H50O3		up	positive
8.68_414.3136	4.9494	0	0	2.0299	Diosgenin	C27H42O3	HMDB0242671	up	positive
0.653_376.0263	4.8424	0	0.0004	1.891		C12H19N4P3S2		up	positive
0.685_232.0349	4.8245	0	0	2.0176	1-o-phosphonopentitol	C5H13O8P		up	positive
0.614_833.7404	4.7961	0.0003	0.0013	1.9077		C23H5N2O17P3S5		up	positive
7.449_285.2668	4.546	0	0	1.9076	C17 sphingosine	C17H35NO2		up	positive
0.587_319.8589	4.4819	0.0001	0.0005	1.8735		C9H4ClOP3S2		up	positive
3.651_119.0736	4.2651	0.0012	0.004	1.6227		C8H9N		up	positive
9.995_230.2035	4.2646	0.0007	0.0026	1.6957		C17H26		up	positive
0.678_350.0614	4.1685	0	0	1.8618		C11H14N2O11		up	positive
0.652_398.0082	3.9333	0.0001	0.0006	1.7889		C9H17N6O2P3S2		up	positive
4.062_377.1259	3.9213	0.0001	0.0009	1.8231	Dasolampanel	C17H20ClN5O3		up	positive
0.652_551.0704	3.909	0.0004	0.0017	1.7014		C10H27N5O15P2S		up	positive
0.63_180.9545	3.9016	0.0002	0.0012	1.721	[similar to: l-tyrosine; δmass: -0.1194 da]			up	positive
0.74_149.0512	3.868	0	0.0001	1.7927	L-(-)-methionine	C5H11NO2S	HMDB0000696	up	positive
9.723_460.3919	3.8331	0.0001	0.0006	1.6814	Protopanaxadiol	C30H52O3	HMDB0035777	up	positive
10.157_464.3632	3.7893	0.0191	0.0391	1.1896		C28H44N6		up	positive
10.156_442.3813	3.7842	0.0206	0.0419	1.1876	Betulin	C30H50O2	HMDB0036838	up	positive
0.682_416.1303	3.692	0.0135	0.03	1.4772				up	positive
8.033_302.1665	3.6822	0	0	1.7631	Dehydrosiphonochalynol	C22H22O		up	positive
0.613_901.7287	3.6753	0.0007	0.0026	1.6615		C50H103N5O2S3		up	positive
10.011_424.3707	3.6728	0.0038	0.0102	1.4775	Lupenone	C30H48O	HMDB0254213	up	positive
0.653_222.965	3.6591	0	0.0003	1.7461		C4H8N3P3S		up	positive
10.156_459.4079	3.6559	0.0173	0.0365	1.1938		C30H53NO2		up	positive
1.006_323.006	3.6307	0	0	1.8075		C12H11N3O2P2S		up	positive
0.591_455.8342	3.6061	0.0002	0.0011	1.6747		C10H4ClN2O7P3S2		up	positive
9.696_417.3607	3.4565	0.008	0.0195	1.4057	(5z,8z,11z,14z)-n-(2-methoxyethyl)-16,16-dimethyl-5,8,11,14-docosatetraenamide	C27H47NO2		up	positive
7.601_361.2827	3.4368	0	0.0001	1.7475		C19H39NO5		up	positive
9.557_380.3081	3.4326	0.0008	0.0028	1.5197	Pentalinonsterol	C27H40O		up	positive
0.66_185.0092	3.3428	0	0.0003	1.7028	L-serine o-phosphate	C3H8NO6P	HMDB0000272	up	positive
9.557_199.1593	3.318	0.0007	0.0026	1.5076	[similar to: diosgenin; δmass: -215.1541 da]			up	positive
8.979_398.3186	3.3082	0	0	1.7288	Calicoferol e	C27H42O2		up	positive
0.654_346.0366	3.3027	0.0012	0.004	1.5571		C7H18N6O2S4		up	positive
3.652_179.0948	3.2838	0.0003	0.0013	1.559	Salsolinol	C10H13NO2	HMDB0042012	up	positive
0.652_220.0116	3.2404	0	0.0001	1.7207		C3H5N6O4P		up	positive
0.702_345.0404	3.2397	0.0001	0.0006	1.6195		C9H22N3OP3S2		up	positive
0.69_216.061	3.2218	0	0	1.7448		C5H8N6O4		up	positive
0.644_194.9702	3.1129	0.0019	0.0058	1.5998		CHN5O5S		up	positive
0.635_164.9596	3.1033	0.0006	0.0023	1.5909				up	positive
0.584_235.8976	3.0976	0.0002	0.0012	1.5656		CH3ClN2O4P2S		up	positive
7.839_331.2723	3.0443	0.0005	0.002	1.5159		C19H33N5		up	positive
9.696_422.316	3.007	0.0172	0.0363	1.2542		C24H42N2O4		up	positive
1.006_204.9801	3.0067	0	0	1.6641		C4H3N3O5S		up	positive
0.648_244.9469	3.0035	0.0001	0.0006	1.6011		C7H5NO3P2S		up	positive
1.006_235.983	2.9998	0	0	1.646		C9H7N2P3		up	positive
0.613_969.7157	2.994	0.0024	0.0071	1.4856		C50H108N5O2PS4		up	positive
0.653_338.0703	2.9859	0.0003	0.0015	1.5498		C9H14N4O10		up	positive
0.616_205.8787	2.9557	0.0001	0.0008	1.5512				up	positive
0.713_235.1208	2.9277	0.0001	0.0006	1.555	N-methylanhalonine	C13H17NO3		up	positive
1.004_250.9853	2.9134	0	0	1.6591		C5H7N3O5P2		up	positive
1.006_176.985	2.9038	0	0	1.6417		C3H3N3O4S		up	positive
1.006_232.9748	2.8784	0	0	1.6463		C5H5N3O4P2		up	positive
0.652_537.0549	2.8574	0.0153	0.0332	1.2528				up	positive
0.628_150.9439	2.8493	0.0005	0.002	1.5256				up	positive
0.691_190.0413	2.8468	0.0001	0.0007	1.4922		C8H7N4P		up	positive
9.555_378.2924	2.8268	0.0001	0.0005	1.4887	(22e)-cholesta-4,6,8(14),22-tetraen-3-one	C27H38O		up	positive
6.446_447.2042	2.7528	0	0.0001	1.5681		C21H40NOP3S		up	positive
2.446_214.0414	2.6972	0	0.0003	1.5104	Sulfacetamide	C8H10N2O3S	HMDB0014772	up	positive
1.005_233.9829	2.6778	0	0	1.5444	4-hydroxy-3-(sulfooxy)benzoic acid	C7H6O7S	HMDB0124993	up	positive
9.695_354.3287	2.6692	0.0218	0.0439	1.1471		C26H42		up	positive
0.654_360.0523	2.6427	0.001	0.0034	1.4247		C14H16O9S		up	positive
0.692_147.0762	2.6308	0.0032	0.0088	1.4522		C3H9N5O2		up	positive
0.761_302.0404	2.5874	0.0001	0.0005	1.4579		C5H17N6OP3S		up	positive
0.76_274.0454	2.5356	0	0.0003	1.5321	1-deoxy-d-altro-heptulose 7-phosphate	C7H15O9P		up	positive
8.035_297.3396	2.529	0.0005	0.0021	1.3789		C20H43N		up	positive
9.886_400.2759	2.5143	0.0015	0.0048	1.2712		C21H42N2OP2		up	positive
8.793_435.3716	2.4389	0	0	1.4976		C21H50N5O2P		up	positive
0.649_279.0847	2.4272	0	0.0001	1.4455		C12H13N3O5		up	positive
5.182_237.1002	2.4189	0.0001	0.0008	1.4294	Ethopabate	C12H15NO4		up	positive
0.648_312.9343	2.4082	0.0049	0.0127	1.338		C2H5ClN3O11P		up	positive
3.495_191.0618	2.4077	0	0.0001	1.4914	Acetyl-l-methionine	C7H13NO3S	HMDB0011745	up	positive
0.616_341.8534	2.3795	0.0005	0.002	1.3554		C5H2ClN4O2P3S2		up	positive
0.61_851.76	2.3639	0.0002	0.0012	1.3933		C50H101N5O3S		up	positive
9.694_400.334	2.3568	0.0162	0.0346	1.1065	Mfcd00010474	C27H44O2	HMDB0253789	up	positive
5.066_203.1159	2.3441	0.0002	0.001	1.3866	Acetylcarnitine	C9H17NO4	HMDB0240773	up	positive
0.616_409.841	2.3384	0.0003	0.0014	1.3781		C6H2ClO13P3		up	positive
0.696_158.0205	2.3119	0	0.0001	1.4395				up	positive
9.491_544.3342	2.2869	0.0001	0.0008	1.3474				up	positive
0.999_232.0517	2.2637	0.0001	0.0007	1.3681	4,5-pyrenedione	C16H8O2		up	positive
0.616_273.866	2.2583	0.0007	0.0026	1.2977		C3HO7P3S		up	positive
0.683_334.0876	2.2486	0	0	1.4265	(e)-progabide	C17H16ClFN2O2	HMDB0014975	up	positive
0.667_128.0588	2.2142	0	0	1.3955	Dihydrothymine	C5H8N2O2	HMDB0000079	up	positive
0.616_477.8285	2.2011	0.0007	0.0026	1.3044		C3H5N4O12P3S3		up	positive
1_178.0413	2.1977	0.0003	0.0013	1.3478	Cysteinylglycine	C5H10N2O3S	HMDB0000078	up	positive
0.685_248.0382	2.1968	0.006	0.0153	1.235	884916	C8H13N2O3PS		up	positive
1.195_348.0472	2.1762	0	0.0001	1.3372	Inosine 5'-phosphate	C10H13N4O8P	HMDB0000175	up	positive
0.588_507.8478	2.1758	0.0002	0.0011	1.2832		C16H7N4P3S5		up	positive
0.998_161.0147	2.1749	0.0002	0.0012	1.3389		C5H7NO3S		up	positive
0.616_545.8163	2.1741	0.0011	0.0038	1.2955		C7H4N2O17P2S3		up	positive
1.165_436.9659	2.1671	0.0007	0.0027	1.247		C4H14N3O15P3		up	positive
0.585_303.8849	2.1603	0.0006	0.0024	1.2695		C5H4ClO7P3		up	positive
9.318_507.3332	2.1601	0	0	1.3845	Elacytarabine	C27H45N3O6		up	positive
0.686_115.0273	2.1547	0.001	0.0034	1.2484	Maleamic acid	C4H5NO3	HMDB0254310	up	positive
8.797_440.327	2.1488	0	0	1.3887	Estradiol undecylate	C29H44O3		up	positive
9.493_521.3514	2.1277	0	0.0004	1.3078		C25H53N3O4P2		up	positive
1.006_136.0386	2.1265	0.0004	0.0017	1.2906	Hypoxanthine	C5H4N4O	HMDB0000157	up	positive
0.586_371.8726	2.1247	0.0002	0.0011	1.2713		C12H4ClO4P3S		up	positive
0.653_220.0349	2.1201	0	0.0001	1.3362		C7H14N2P2S		up	positive
7.481_271.1002	2.1192	0.0003	0.0013	1.2598	Carbutamide	C11H17N3O3S	HMDB0249664	up	positive
4.317_565.7473	2.1188	0.0003	0.0014	1.306	[similar to: microcystin-lr ; δmass: -428.8014 da]			up	positive
0.616_613.8032	2.1125	0.0009	0.0033	1.2712	2347	C12H13I3N2O3		up	positive
0.999_307.0836	2.105	0.0002	0.0012	1.3022	L-glutathione reduced	C10H17N3O6S	HMDB0000125	up	positive
7.646_214.157	2.1042	0.0008	0.0029	1.2052	3-oxolauric acid	C12H22O3	HMDB0010727	up	positive
0.616_681.7907	2.1025	0.0007	0.0025	1.2616		C12H4N4O18P2S4		up	positive
4.318_565.246	2.102	0.0002	0.0011	1.3144		C27H41N3O6P2		up	positive
0.697_367.0219	2.1008	0.0013	0.0043	1.1777	Anilofos	C13H19ClNO3PS2	HMDB0248439	up	positive
0.84_88.0161	2.0802	0	0	1.3591	Pyruvic acid	C3H4O3	HMDB0000243	up	positive
0.773_246.0505	2.0788	0.0001	0.0006	1.2762	Glycerophosphoglycerol	C6H15O8P	HMDB0240316	up	positive
7.377_347.3036	2.0673	0.0001	0.0007	1.3062		C19H41NO4		up	positive
0.644_330.9447	2.0569	0.0122	0.0275	1.1775		C3H12NO9P3S		up	positive
0.722_193.9958	2.0491	0.0003	0.0016	1.2306		CH3N6O4P		up	positive
0.654_218.0402	2.0407	0	0.0001	1.3002	(1s,2r)-1,2-dihydrodibenzo[b,d]thiophene-1,2-diol	C12H10O2S		up	positive
4.202_189.1003	2.0141	0.0004	0.0017	1.2555	(+)-castanospermine	C8H15NO4	HMDB0249700	up	positive
0.655_206.9911	2.0104	0	0.0001	1.2887		C7HN3O5		up	positive
0.697_216.1222	2.0024	0	0	1.3312	N-α-l-acetyl-arginine	C8H16N4O3	HMDB0004620	up	positive
0.636_103.0998	1.9979	0.0003	0.0015	1.3622	Choline	C5H13NO	HMDB0000097	up	positive
0.652_192.9756	1.9882	0.0015	0.0046	1.1721				up	positive
0.629_300.9343	1.9836	0.0039	0.0105	1.1774		C5H7ClN3O4P3		up	positive
1.018_103.0456	1.9728	0	0.0004	1.3024	2-methylthiazolidine	C4H9NS	HMDB0031682	up	positive
1.02_132.0246	1.9596	0.0001	0.0008	1.3082	3-methylsulfolene	C5H8O2S	HMDB0059667	up	positive
0.587_575.8352	1.9364	0.0001	0.0007	1.2032		C17H3ClO15P2S		up	positive
5.068_157.1105	1.93	0.0002	0.0012	1.2269	Tranexamic acid	C8H15NO2	HMDB0014447	up	positive
0.766_242.0192	1.9153	0.0002	0.0011	1.1895	1d-myo-inositol 1,2-cyclic phosphate	C6H11O8P	HMDB0001125	up	positive
0.652_382.0346	1.9053	0.0085	0.0205	1.0848	5-(5,7-dihydroxy-4-oxo-3,4-dihydro-2h-chromen-2-yl)-2-methoxyphenyl hydrogen sulfate	C16H14O9S	HMDB0029202	up	positive
1.75_139.9875	1.9047	0	0.0004	1.2605	Phosphonoacetate	C2H5O5P	HMDB0004110	up	positive
8.283_272.0838	1.896	0	0	1.2994	Anigorufone	C19H12O2	HMDB0033935	up	positive
0.586_439.8602	1.8663	0.0003	0.0012	1.1537		C9H5N4O5PS5		up	positive
0.588_643.8227	1.8504	0.0002	0.001	1.1608		C25H3N4O4P3S4		up	positive
0.585_297.1799	1.8446	0	0	1.2599		C13H23N5O3		up	positive
0.616_749.7783	1.8409	0.0028	0.0081	1.1302		C14H5N6O17P3S4		up	positive
6.582_303.1506	1.8362	0	0.0001	1.1985		C14H25NO4S		up	positive
1.557_321.0995	1.8354	0.0026	0.0075	1.1371	S-methylglutathione	C11H19N3O6S		up	positive
7.438_487.2364	1.8278	0	0.0001	1.2387		C22H39N3O5P2		up	positive
0.666_147.0533	1.8196	0.0006	0.0023	1.1073	L-glutamic acid	C5H9NO4	HMDB0000148	up	positive
1.736_267.0968	1.8127	0.0002	0.0011	1.2176	Adenosine	C10H13N5O4	HMDB0000050	up	positive
3.097_383.1079	1.8085	0.0003	0.0014	1.1738	Succinyladenosine	C14H17N5O8	HMDB0000912	up	positive
8.998_314.1671	1.8022	0.0001	0.0007	1.1393		C23H22O		up	positive
7.105_317.166	1.7897	0	0.0002	1.1796		C15H29NO2P2		up	positive
9.301_454.3427	1.7873	0.0002	0.001	1.1251	Seocalcitol	C30H46O3	HMDB0242642	up	positive
8.119_259.1604	1.7696	0.0002	0.0012	1.0936		C13H25NO2S		up	positive
7.753_256.0398	1.7634	0.0017	0.0053	1.0237	(2z)-2-benzylidene-3-oxobutyl hydrogen sulfate	C11H12O5S	HMDB0133691	up	positive
2.216_329.0526	1.7619	0	0.0001	1.19	Adenosine cyclic 3',5'-monophosphate	C10H12N5O6P	HMDB0000058	up	positive
7.753_274.087	1.7609	0.0001	0.0008	1.0859	1-(4-methoxyphenyl)-3-pentanyl hydrogen sulfate	C12H18O5S	HMDB0133010	up	positive
0.691_309.1059	1.7592	0.0004	0.0017	1.0666	N-acetylneuraminic acid	C11H19NO9	HMDB0000230	up	positive
7.752_214.0505	1.7557	0.0004	0.0016	1.0766	Monolinuron	C9H11ClN2O2	HMDB0254863	up	positive
1.017_189.9565	1.727	0	0	1.164		C5H2O6S		up	positive
4.227_370.2216	1.7119	0.0001	0.0007	1.1458	Ho-dpeg8-oh	C16H34O9	HMDB0094680	up	positive
0.731_135.0685	1.7078	0.0021	0.0062	1.0181	Acetanilide	C8H9NO	HMDB0001250	up	positive
0.614_1021.7297	1.7051	0.0033	0.0091	1.0152				up	positive
0.694_378.1209	1.7018	0.0094	0.0221	1.0444		C11H27N2O8PS		up	positive
8.516_273.1764	1.6881	0.0002	0.0011	1.057		C14H27NO2S		up	positive
0.736_331.088	1.6826	0	0.0001	1.1206		C7H18N5O8P		up	positive
9.924_349.298	1.6798	0.0002	0.001	1.0888	N-homo-?-linolenoylethanolamine	C22H39NO2	HMDB0013625	up	positive
0.666_105.0427	1.6773	0.0007	0.0026	1.0205	L-serine	C3H7NO3	HMDB0000187	up	positive
1.332_423.0952	1.6742	0.0005	0.002	1.0349		C16H28NO4P3S		up	positive
0.835_206.0362	1.6682	0	0.0002	1.0592		C6H10N2O4S		up	positive
0.616_885.7541	1.6593	0.0213	0.0429	1.0099		C31H5O18P3S4		up	positive
1.014_188.9487	1.6568	0	0.0003	1.0723		C3HN3O3P2		up	positive
0.659_75.0322	1.656	0.0006	0.0023	1.0354	Glycine	C2H5NO2	HMDB0000123	up	positive
7.753_242.0606	1.6514	0.0004	0.0019	1.0079		C7H12N6P2		up	positive
1.749_185.9931	1.6442	0.0004	0.0018	1.0849	D-(-)-3-phosphoglyceric acid	C3H7O7P	HMDB0060180	up	positive
6.026_289.1348	1.6432	0	0.0004	1.0626	Chloropyramine	C16H20ClN3	HMDB0015690	up	positive
0.616_817.7663	1.6394	0.0184	0.0382	1.0016		C23H5N2O18P3S4		up	positive
1.349_217.9515	1.6243	0	0.0004	1.0759		C6H2O7S		up	positive
0.946_663.1101	1.6151	0.0001	0.0007	1.0199	Nicotinamide adenine dinucleotide (nad+)	C21H27N7O14P2	HMDB0000902	up	positive
0.685_115.0634	1.6079	0	0.0004	1.0536	L-proline	C5H9NO2	HMDB0000162	up	positive
9.237_544.3367	1.6029	0.0002	0.0012	1.0482		C21H49N6O8P		up	positive
0.645_154.0355	1.5642	0	0.0004	1.0099				up	positive
0.567_132.0899	1.5516	0	0.0001	1.0125	D-ornithine	C5H12N2O2	HMDB0003374	up	positive
1.351_100.0162	1.5438	0	0.0004	1.0246	Succinic anhydride	C4H4O3	HMDB0032523	up	positive
1.02_206.9593	1.5348	0	0.0001	1.003		C3HN3O6S		up	positive
0.881_323.0519	1.5311	0	0	1.002	Cytidine 5'-monophosphate (hydrate)	C9H14N3O8P	HMDB0000095	up	positive
1.353_234.9542	1.5228	0.0001	0.0007	1.0047		C4H3N3O5P2		up	positive
0.837_156.0036	1.4967	0.0006	0.0024	1.0244				up	positive
0.753_211.0359	0.6606	0.0129	0.0289	1.0205	Phosphocreatine	C4H10N3O5P	HMDB0001511	down	positive
0.631_254.9707	0.6396	0	0.0001	1.0128		C4H6N3O6PS		down	positive
0.582_272.9381	0.6345	0.0001	0.0005	1.0191		C5H2N5O3P3		down	positive
0.649_163.0222	0.6298	0	0	1.0854		C5H10NOPS		down	positive
0.703_251.1521	0.6204	0.0001	0.0007	1.011	Lt9970000	C14H21NO3		down	positive
0.613_937.7682	0.6165	0.0001	0.0004	1.0121		C30H9N2O18P3S5		down	positive
0.613_377.893	0.6164	0	0.0004	1.0846		C3H5N6O6P3S2		down	positive
0.762_292.0908	0.6118	0.0232	0.0463	1.0598	Ethylenediaminetetraacetic acid	C10H16N2O8	HMDB0015109	down	positive
0.582_339.9245	0.6002	0.0008	0.0028	1.0674		C4H9N2O8PS3		down	positive
5.173_275.1192	0.5979	0.0002	0.0011	1.0573		C12H21NO4S		down	positive
0.75_217.9358	0.5932	0	0.0001	1.1147	[similar to: r-1 methanandamide phosphate; δmass: -223.3286 da]			down	positive
0.613_445.8805	0.5899	0.0001	0.0007	1.13		C5H9N2O12P3S2		down	positive
0.7_408.9531	0.5778	0.0141	0.0309	1.0515				down	positive
0.614_513.8681	0.5706	0	0.0004	1.1607		C8H9N2O14P3S2		down	positive
0.668_310.9758	0.5704	0.0092	0.0218	1.0763		C7H5NO13		down	positive
4.93_162.0318	0.5683	0	0	1.1838	7-hydroxycoumarine	C9H6O3	HMDB0029865	down	positive
0.669_153.0515	0.5588	0.0001	0.0007	1.2304				down	positive
0.637_268.9864	0.558	0.0001	0.0007	1.1192		C7H13NO2P2S2		down	positive
8.609_399.3351	0.5577	0.0032	0.0089	1.1551	Palmitoylcarnitine	C23H45NO4	HMDB0000222	down	positive
4.93_180.0424	0.5561	0	0	1.2149	Aspirin	C9H8O4	HMDB0001879	down	positive
0.615_1005.7558	0.5525	0.0001	0.0006	1.1257				down	positive
0.584_475.8996	0.5514	0.0002	0.0012	1.1657		C11H6N6O6P2S3		down	positive
11.102_429.3736	0.5508	0.0108	0.025	1.1222		C25H52NO2P		down	positive
0.582_407.9121	0.5461	0.0003	0.0014	1.1891		C13H6N4O2P2S3		down	positive
0.721_119.9589	0.541	0.0008	0.0028	1.1356				down	positive
0.751_337.8947	0.5403	0	0.0001	1.2002		C4HN6O5P3S		down	positive
0.612_835.7857	0.5375	0.0003	0.0013	1.1558				down	positive
0.613_581.8555	0.5264	0.0001	0.0005	1.2541		C9H5N4O18P3S		down	positive
0.609_89.9694	0.5184	0	0.0001	1.2749				down	positive
0.66_364.0983	0.5175	0.001	0.0034	1.2478		C10H16N6O9		down	positive
0.674_131.0696	0.5116	0	0.0001	1.3287	Creatine	C4H9N3O2	HMDB0000064	down	positive
0.751_215.0072	0.5043	0	0.0003	1.3486	4-nitro-6-oxohepta-2,4-dienedioic acid	C7H5NO7		down	positive
0.638_484.9483	0.5029	0.0011	0.0038	1.1367		C8H14N3O13P3S		down	positive
9.645_610.5276	0.4869	0.0046	0.012	1.1264	[similar to: 10-nitrooleate; δmass: 283.2867 da]			down	positive
3.994_264.1474	0.4849	0.001	0.0034	1.1909	Vorinostat	C14H20N2O3	HMDB0015568	down	positive
0.684_205.0327	0.4844	0	0	1.3741		C7H12NO2PS		down	positive
0.745_457.8542	0.48	0	0.0002	1.3091		C3HN4O17P3		down	positive
7.449_354.0565	0.4792	0.0051	0.0132	1.2485	Phenol red	C19H14O5S		down	positive
8.939_453.3823	0.4679	0.0003	0.0013	1.3322	(11z)-eicoseneoylcarnitine	C27H51NO4	HMDB0240746	down	positive
0.727_217.1315	0.466	0.0051	0.0132	1.1768	Propionylcarnitine	C10H19NO4	HMDB0000824	down	positive
3.014_232.1423	0.4651	0.0118	0.0268	1.0782	Mebutamate	C10H20N2O4		down	positive
3.631_230.1631	0.4623	0.0006	0.0024	1.2485	Leu-val	C11H22N2O3	HMDB0028942	down	positive
0.612_649.843	0.4616	0	0.0003	1.3895		C8H9N6O17P3S3		down	positive
0.583_611.8739	0.4616	0.0002	0.0012	1.3608		C9H7N6O18P3S		down	positive
0.584_543.8874	0.4596	0	0.0003	1.3641		C20H5N2O9PS3		down	positive
9.646_326.3291	0.4557	0.0113	0.026	1.042		C20H42N2O		down	positive
3.708_294.0865	0.4533	0.0057	0.0146	1.2711		C11H19O7P		down	positive
0.658_139.0611	0.45	0	0.0003	1.38				down	positive
0.614_903.7738	0.4425	0	0.0003	1.3267				down	positive
9.927_592.5913	0.4419	0.0185	0.0383	1.0084		C38H76N2O2		down	positive
0.544_71.0736	0.4362	0	0	1.4593	Pyrrolidine	C4H9N	HMDB0031641	down	positive
0.611_157.9569	0.4342	0	0.0001	1.4265				down	positive
0.611_717.8304	0.43	0	0.0003	1.4546				down	positive
0.584_747.8492	0.424	0.0004	0.0018	1.4222		C16H10N6O17P2S4		down	positive
0.691_179.8967	0.4236	0.0051	0.0132	1.4313	[similar to: veratrole; δmass: 41.8286 da]			down	positive
0.621_691.8264	0.4227	0.0086	0.0206	1.2344		C10H10N6O16P2S5		down	positive
0.732_141.9409	0.4207	0.0004	0.0019	1.4422				down	positive
0.7_322.0041	0.4205	0.0003	0.0015	1.4222		C5H11N2O12P		down	positive
0.585_679.8617	0.4151	0.0001	0.0006	1.4598		C17H11N6O10P3S4		down	positive
0.641_247.8633	0.4147	0.0238	0.0473	1.8115		C2H3ClN2P2S3		down	positive
0.612_657.8303	0.4103	0.0001	0.0008	1.4859				down	positive
4.555_259.1784	0.406	0	0	1.5414	Hexanoylcarnitine	C13H25NO4	HMDB0000705	down	positive
0.674_227.0146	0.3964	0	0.0001	1.5073		C4H12N3O2P3		down	positive
8.722_357.3607	0.3936	0.0184	0.0382	1.2368		C22H47NO2		down	positive
0.731_261.8996	0.3931	0.0001	0.0005	1.4818		C6HO6P3		down	positive
0.611_225.9442	0.3911	0	0.0001	1.5139	(2e)-2,5-dichloro-4-oxo-2-hexenedioic acid	C6H4Cl2O5	HMDB0060363	down	positive
0.742_555.8312	0.3886	0	0.0002	1.49				down	positive
0.664_332.9576	0.3872	0.0078	0.0192	1.4819		C2H8NO16P		down	positive
6.397_175.0635	0.3848	0.0109	0.0251	1.2922	Indole-3-acetic acid	C10H9NO2	HMDB0000197	down	positive
6.396_334.0988	0.3839	0.0123	0.0277	1.2907	Penicillin g	C16H18N2O4S	HMDB0015186	down	positive
0.609_725.8178	0.3811	0.0001	0.0009	1.5463				down	positive
0.611_785.8179	0.3762	0	0.0002	1.5723				down	positive
6.395_159.0356	0.3762	0.0115	0.0262	1.299	Citiolone	C6H9NO2S	HMDB0250301	down	positive
0.612_293.9315	0.3753	0	0.0001	1.5482		C3H8N2O6P2S2		down	positive
6.394_113.0301	0.3747	0.0084	0.0204	1.3314	2,4-dimethylthiazole	C5H7NS	HMDB0032974	down	positive
0.649_146.9968	0.374	0	0.0003	1.5842	[similar to: l-glutamic acid; δmass: -0.0564 da]			down	positive
0.611_853.8056	0.3673	0	0.0004	1.5903				down	positive
2.866_231.1471	0.3613	0.0004	0.0017	1.5266	N-(tert-butoxycarbonyl)-l-leucine	C11H21NO4		down	positive
0.585_883.8247	0.3604	0.0002	0.0011	1.5604		C36H7O18P3S2		down	positive
0.666_286.9315	0.359	0.0118	0.0268	1.9134		C6H6ClNO6S2		down	positive
9.644_281.2714	0.3572	0.0184	0.0382	1.1921	Oleamide	C18H35NO	HMDB0002117	down	positive
0.619_759.8135	0.3561	0.0002	0.0011	1.5876		C22H7N2O17P3S3		down	positive
0.727_381.8587	0.3527	0.0001	0.0007	1.5647		C2HN4O11P3S		down	positive
9.198_277.2405	0.3518	0.0174	0.0366	1.2348	Obscuraminol a	C18H31NO		down	positive
0.692_303.0096	0.3496	0.0008	0.003	1.6213		C9H12N3O3P3		down	positive
2.815_218.1267	0.3479	0	0.0004	1.5353	Meprobamate	C9H18N2O4	HMDB0014515	down	positive
4.367_244.1788	0.3381	0.0002	0.0012	1.5112	Leu-leu	C12H24N2O3	HMDB0254039	down	positive
0.708_335.8323	0.3352	0.0029	0.0081	1.6779		CH3ClO10P2S2		down	positive
0.611_921.7939	0.3296	0.0001	0.0006	1.6839				down	positive
0.639_190.0331	0.3286	0.0001	0.0005	1.6296		C6H11N2OPS		down	positive
0.611_361.919	0.3275	0	0.0001	1.6634		C4H3N4O12PS		down	positive
8.605_199.1938	0.3268	0.0015	0.0047	1.4628	Lauramide	C12H25NO	HMDB0251566	down	positive
0.616_895.7874	0.3207	0	0.0003	1.6915				down	positive
1.217_289.1274	0.3166	0	0.0002	1.6834	Ophthalmic acid	C11H19N3O6	HMDB0005765	down	positive
0.653_142.0243	0.3162	0.0018	0.0055	1.7042		C2H2N6O2		down	positive
9.409_608.5129	0.3089	0.0047	0.0124	1.4071		C36H68N2O5		down	positive
0.611_429.9065	0.3086	0	0.0002	1.71		C4H8N4O12P2S2		down	positive
9.642_381.1961	0.3057	0.0136	0.0301	1.3019		C14H32N5O3PS		down	positive
0.611_497.8941	0.2981	0	0.0002	1.7361		C8H9N2O15P3S		down	positive
0.616_827.7996	0.2964	0.0001	0.0006	1.7512		C26H3N6O15P3S3		down	positive
0.659_248.9756	0.2868	0.0063	0.016	2.0389		C3H11ClN3O2P3		down	positive
0.612_989.7819	0.2834	0.0001	0.0006	1.793				down	positive
0.609_861.7934	0.2829	0.0009	0.003	1.8069				down	positive
0.61_565.8814	0.2828	0	0.0002	1.7797		C5H8N6O18P2S2		down	positive
0.734_599.7953	0.2818	0.0001	0.0006	1.7644				down	positive
8.647_295.2511	0.2757	0.0007	0.0026	1.5461	(9z,12z)-n-hydroxy-9,12-octadecadienamide	C18H33NO2		down	positive
9.642_337.191	0.2752	0.0075	0.0186	1.3861		C18H28ClN3O		down	positive
9.41_244.219	0.2724	0.0057	0.0146	1.4627		C18H28		down	positive
9.41_183.1624	0.2722	0.0029	0.0083	1.4865	(2,7-dimethyloctahydro-1h-cyclopenta[c]pyridin-4-yl)methanol	C11H21NO		down	positive
9.41_178.1721	0.2694	0.0022	0.0066	1.5222	(3e,5e,7e)-6-ethyl-4-methyl-3,5,7-decatriene	C13H22		down	positive
0.653_161.1053	0.2672	0	0	1.8364	L(-)-carnitine	C7H15NO3	HMDB0000062	down	positive
9.41_262.2296	0.2654	0.0067	0.0168	1.4489	Sl3675000	C18H30O		down	positive
0.692_159.126	0.2587	0	0	1.8722	Pregabalin	C8H17NO2	HMDB0014375	down	positive
0.609_633.8689	0.2566	0	0.0003	1.86				down	positive
0.608_701.8563	0.2517	0	0.0003	1.8727		C19H5N4O18P3S		down	positive
0.687_163.9229	0.2506	0.0006	0.0024	1.8576				down	positive
0.672_139.8962	0.2505	0.0091	0.0216	1.5588				down	positive
0.689_324.9915	0.2482	0.001	0.0034	1.9393		C2H8N5O12P		down	positive
9.643_365.2238	0.2472	0.0103	0.024	1.3796		C17H35NO5S		down	positive
0.611_615.8492	0.2451	0.0001	0.0007	1.8774		C11H3N6O17P3S		down	positive
0.692_237.8552	0.2421	0.0026	0.0075	2.0095				down	positive
0.664_270.9576	0.2385	0.004	0.0107	2.2349		C5H7ClN3O4PS		down	positive
0.612_683.8364	0.2385	0.0001	0.0008	1.9486		C25H3O16P3S		down	positive
0.65_231.8893	0.2302	0.0031	0.0085	2.2735		C3HClO6S2		down	positive
0.671_248.1484	0.2288	0	0	1.9189		C9H20N4O4		down	positive
0.644_147.928	0.2261	0.0042	0.011	1.6801				down	positive
0.678_260.0038	0.2255	0.003	0.0083	1.9615		C3H12ClN6P3		down	positive
0.661_317.9623	0.2244	0.009	0.0215	1.5347		C4H9ClN6O3P2S		down	positive
9.41_155.1311	0.224	0.0067	0.0168	1.5383	To0127900	C9H17NO	HMDB0031179	down	positive
0.671_379.9625	0.2226	0.0014	0.0044	1.6772		C5H15N6O2P3S3		down	positive
9.41_301.2381	0.2225	0.0067	0.0167	1.528		C14H32N5P		down	positive
0.631_299.8974	0.2198	0.0031	0.0085	1.9088				down	positive
0.695_203.1158	0.2187	0	0	2.0093	O-acetylcarnitine	C9H17NO4	HMDB0240773	down	positive
0.608_769.8436	0.2176	0	0.0002	1.9769				down	positive
0.608_837.831	0.2166	0	0.0003	1.9857				down	positive
0.635_231.9101	0.215	0.0006	0.0024	2.1931		C2H3O7P3		down	positive
0.685_295.8137	0.2137	0.0013	0.0042	2.0346				down	positive
9.409_195.1624	0.2131	0.0044	0.0115	1.5967	3-amino-5,7-dimethyl-1-adamantanol	C12H21NO	HMDB0060738	down	positive
0.658_243.8632	0.2129	0.0063	0.016	1.5745		C4H2ClO2PS3		down	positive
9.41_169.1467	0.2122	0.0115	0.0262	1.5232	(-)-lupinine	C10H19NO	HMDB0304704	down	positive
9.411_164.1566	0.2098	0.0185	0.0383	1.435	(2e,4e,6e)-5-ethyl-3-methyl-2,4,6-nonatriene	C12H20		down	positive
0.547_250.1529	0.2055	0	0.0004	2.001		C10H22N2O5		down	positive
0.69_257.8579	0.2018	0.001	0.0034	2.0361				down	positive
0.7_319.8583	0.1971	0.0002	0.0012	1.978		C2H7ClO6P2S3		down	positive
0.961_71.0372	0.1964	0.0066	0.0165	1.5315	6185892	C3H5NO	HMDB0004296	down	positive
0.609_905.8194	0.1962	0	0.0003	2.0456				down	positive
9.409_379.1808	0.1929	0.0054	0.014	1.6299	Sudan 7b	C24H21N5	HMDB0258561	down	positive
0.675_199.8995	0.1919	0.0009	0.0032	2.0903				down	positive
0.694_262.1389	0.1883	0.0002	0.0012	2.0984	Streptidine	C8H18N6O4	HMDB0258506	down	positive
0.698_341.8403	0.1846	0.0005	0.0021	1.9329		C4H5ClO6P2S3		down	positive
0.65_215.9155	0.1827	0.0016	0.0051	2.5671	Mutagen x	C5H3Cl3O3	HMDB0245833	down	positive
0.647_338.9451	0.1818	0.0013	0.0043	2.026		C3H7ClN5O8PS		down	positive
0.651_103.0634	0.1805	0	0	2.1789	Gamma-aminobutyric acid	C4H9NO2	HMDB0000112	down	positive
0.682_279.84	0.1799	0.003	0.0084	1.9957		C3HClO5S4		down	positive
9.411_209.1779	0.1797	0.0094	0.0221	1.5774	(3z,6e)-n-hydroxy-2,4,4,7-tetramethyl-6,8-nonadien-3-imine	C13H23NO	HMDB0036031	down	positive
0.662_142.9809	0.1756	0.0021	0.0064	2.2059		C2H6ClNO2S		down	positive
0.609_973.8066	0.1755	0.0001	0.0005	2.1497				down	positive
4.01_287.1845	0.1726	0.0001	0.0005	2.0458		C13H25N3O4		down	positive
9.409_285.2642	0.1655	0.0107	0.0248	1.5903				down	positive
9.41_197.1782	0.1642	0.0066	0.0166	1.6913		C12H23NO		down	positive
9.408_363.2084	0.1551	0.005	0.013	1.7036		C17H35NO3P2		down	positive
0.69_221.8814	0.1527	0.0007	0.0026	2.337		C2H6ClP3S2		down	positive
5.359_572.3178	0.1419	0.0002	0.0009	2.2493		C23H49N4O10P		down	positive
9.41_335.1758	0.1389	0.012	0.0271	1.6902	Hydroxychloroquine	C18H26ClN3O	HMDB0015549	down	positive
3.634_261.1114	0.1339	0	0	2.2861	Imazapyr	C13H15N3O3	HMDB0253405	down	positive
3.6_318.1328	0.1331	0	0.0004	2.2536	His-tyr	C15H18N4O4	HMDB0028897	down	positive
3.391_243.1471	0.1279	0	0	2.3424	3-hydroxy-n-[(3s)-2-oxotetrahydro-3-furanyl]octanamide	C12H21NO4		down	positive
3.576_291.1219	0.1257	0	0.0001	2.2752	Danegaptide	C14H17N3O4		down	positive
4.217_246.1038	0.1098	0	0.0003	2.2099	Pro-met	C10H18N2O3S	HMDB0029023	down	positive
10.711_477.4551	0.1016	0.0147	0.0319	1.6524		C31H59NO2		down	positive
10.824_477.4551	0.0999	0.0194	0.0396	1.6247		C31H59NO2		down	positive
9.644_568.5522	0.0977	0.019	0.039	1.6418		C35H72N2O3		down	positive
4.586_398.2531	0.0969	0	0.0004	2.5042		C17H39N2O6P		down	positive
3.76_301.1428	0.0887	0	0	2.5181	(-)-febrifugine	C16H19N3O3	HMDB0242253	down	positive
9.64_662.4686	0.0477	0.0133	0.0296	1.8944		C39H68ClN2O2P		down	positive
0.685_238.0987	74.527	0	0	3.1676	Hepes	C8H18N2O4S	HMDB0062295	up	negative
0.637_293.0795	7.8971	0	0	2.1861				up	negative
0.666_559.8115	5.0975	0.0006	0.0016	1.8777		C10H7ClO15P2S3		up	negative
2.948_323.9571	4.7208	0	0	1.8693	Urochloralic acid	C8H11Cl3O7	HMDB0042049	up	negative
0.659_173.9931	4.253	0	0	1.7489		C2H7O7P		up	negative
0.659_309.968	3.8243	0	0	1.6961		C6H6N4O7S2		up	negative
0.695_345.04	3.4328	0.0001	0.0004	1.6083		C10H21NO4P2S2		up	negative
0.694_413.0274	3.3709	0.0004	0.0011	1.6016		C7H22N5O5P3S2		up	negative
0.711_311.1217	3.2345	0	0.0001	1.5825	N2-dimethylguanosine	C12H17N5O5	HMDB0004824	up	negative
0.623_607.0817	3.2063	0.0026	0.0054	1.5193	Udp-n-acetylglucosamine	C17H27N3O17P2	HMDB0000290	up	negative
0.627_506.9954	2.9524	0.002	0.0042	1.4153	2'-deoxyguanosine 5'-triphosphate (dgtp)	C10H16N5O13P3	HMDB0001440	up	negative
2.384_191.0616	2.8802	0	0	1.5992	N-acetyl-l-methionine	C7H13NO3S	HMDB0011745	up	negative
4.065_237.1	2.8617	0	0.0001	1.5258	Ethopabate	C12H15NO4		up	negative
0.657_367.927	2.814	0	0	1.5087		C5H12ClN4O3P3S2		up	negative
0.599_169.9886	2.8025	0	0	1.5295	3-sulfolactic acid	C3H6O6S	HMDB0060176	up	negative
0.705_240.0845	2.7631	0	0.0003	1.4432		C8H16O8		up	negative
0.671_281.9156	2.6888	0.0003	0.0008	1.3994		C6H4O7P2S		up	negative
0.7_464.9852	2.6651	0.0001	0.0005	1.4379		C14H13NO13P2		up	negative
0.652_202.0455	2.6133	0.0046	0.0089	1.2847	[similar to: sucrose; δmass: -140.0707 da]			up	negative
0.591_276.0285	2.5248	0	0.0001	1.4553	5-(4-acetoxy-1-butynyl)-2,2â€²-bithienyl	C14H12O2S2	HMDB0034454	up	negative
2.968_166.0631	2.511	0.0001	0.0005	1.3691	L-(-)-3-phenyllactic acid	C9H10O3	HMDB0000563	up	negative
3.792_203.1158	2.5045	0	0	1.4362	Acetylcarnitine	C9H17NO4	HMDB0240773	up	negative
0.633_220.9857	2.4868	0	0.0001	1.3582		C3H9ClNO6P		up	negative
0.659_435.9142	2.4172	0	0	1.382		C7H8ClN4O10P3		up	negative
0.66_503.9011	2.3126	0	0	1.3092		C4H12ClN2O18P3		up	negative
0.669_349.9034	2.2605	0.0008	0.002	1.2604		C5H6ClN2O8P3		up	negative
9.484_539.3219	2.1808	0	0	1.324	O-{hydroxy[(2r)-2-hydroxy-3-{[(6z)-2-methoxy-6-octadecen-1-yl]oxy}propoxy]phosphoryl}-l-serine	C25H50NO9P		up	negative
0.678_241.0563	2.1803	0.0005	0.0013	1.3014		C8H12N5PS		up	negative
0.627_169.0505	2.1533	0.0001	0.0003	1.2642	P-dmea	C4H12NO4P	HMDB0060244	up	negative
0.697_307.084	2.0957	0.0019	0.004	1.1962	L-glutathione (reduced)	C10H17N3O6S	HMDB0000125	up	negative
0.637_300.9264	2.082	0	0	1.2318		C2H8ClN3O6S3		up	negative
0.681_213.0041	2.0708	0.0004	0.0011	1.1705	Phosphoaspartate	C4H8NO7P	HMDB0012250	up	negative
0.667_271.8868	2.0647	0.0005	0.0013	1.201		CHClO12S		up	negative
0.636_242.9676	2.0558	0.0004	0.0012	1.1897		C7H2ClN3O5		up	negative
0.654_357.8981	2.029	0.0021	0.0044	1.0813		C2H8ClN6O3PS4		up	negative
9.881_567.3546	2.0021	0.0009	0.0021	1.1199	O-{[(2r)-3-(henicosanoyloxy)-2-hydroxypropoxy](hydroxy)phosphoryl}-l-serine	C27H54NO9P	HMDB0243883	up	negative
8.936_251.152	1.9962	0	0.0002	1.1765	Lt9970000	C14H21NO3		up	negative
0.706_170.9967	1.9708	0	0	1.2279				up	negative
2.5_447.1173	1.9642	0.0116	0.0198	1.2123		C15H22N5O9P		up	negative
9.655_315.2233	1.9413	0	0.0001	1.1272		C17H33NO2S		up	negative
0.634_550.9593	1.9279	0.0006	0.0016	1.0909		C10H11N5O18P2		up	negative
0.62_274.0453	1.927	0.0006	0.0016	1.1297	1-deoxy-d-altro-heptulose 7-phosphate	C7H15O9P		up	negative
7.73_201.0194	1.9194	0	0	1.2106		C8H8ClNO3		up	negative
9.624_622.3139	1.9192	0	0.0001	1.1807	(2r)-3-({[(2s)-2,3-dihydroxypropoxy](hydroxy)phosphoryl}oxy)-2-{[(5e)-4,7-dioxo-5-heptenoyl]oxy}propyl palmitate	C29H51O12P		up	negative
3.326_193.0739	1.9185	0	0	1.2689	Phenylacetylglycine	C10H11NO3	HMDB0000821	up	negative
0.667_417.8909	1.8605	0.0067	0.0122	1.0829		C5H7O16PS2		up	negative
0.66_226.0066	1.8451	0	0.0002	1.1022		C4H6N2O9		up	negative
3.345_218.0725	1.822	0.0001	0.0003	1.1099	Cys-pro	C8H14N2O3S	HMDB0028783	up	negative
0.558_321.0698	1.8212	0	0.0002	1.1349	N-[3-carboxy-2-(carboxymethyl)-2-hydroxypropanoyl]glutamic acid	C11H15NO10	HMDB0013220	up	negative
0.586_354.0119	1.7966	0.0126	0.0211	1.1424		C6H15N2O11PS		up	negative
0.573_265.9591	1.7743	0	0	1.1164	2,3-bisphospho-d-glyceric acid	C3H8O10P2	HMDB0001294	up	negative
0.582_378.0202	1.7732	0	0	1.1344		C9H15O14P		up	negative
0.698_348.0475	1.7727	0.0003	0.0008	1.0511	Inosinic acid	C10H13N4O8P	HMDB0000175	up	negative
9.604_589.3387	1.7528	0	0	1.1107		C30H48N5O5P		up	negative
0.695_329.066	1.7527	0.0014	0.0033	1.019		C9H22N3O2P3S		up	negative
0.666_485.878	1.7439	0.0059	0.011	1.016		C7H9N2O13P3S2		up	negative
0.671_197.9543	1.7316	0.0002	0.0007	1.0369		C7H3O3PS		up	negative
0.659_293.994	1.6923	0	0	1.0156		C4H13N2O7P3		up	negative
0.628_177.0637	0.665	0.0204	0.0329	1.0071	(2s,4s)-4-amino-2-hydroxy-2-methylpentanedioic acid	C6H11NO5		down	negative
0.63_159.0532	0.6147	0.0056	0.0104	1.0379	4-methyleneglutamic acid	C6H9NO4	HMDB0029433	down	negative
0.664_171.9516	0.6089	0	0.0001	1.0231	2-bromophenol	C6H5BrO	HMDB0032059	down	negative
0.667_317.9554	0.5997	0.0001	0.0003	1.0286		C6H8O11P2		down	negative
0.662_381.8594	0.5843	0	0.0001	1.0484		C11H8ClOPS5		down	negative
0.627_155.9356	0.5842	0	0.0002	1.0558	[similar to: d-glucose 6-phosphate; δmass: -104.0942 da]			down	negative
0.665_527.8625	0.5815	0.0002	0.0006	1.0423		C12H3ClN2O16P2		down	negative
0.683_199.057	0.5789	0.0001	0.0004	1.1997	[similar to: guanidinosuccinic acid; δmass: 23.9977 da]			down	negative
5.68_354.0565	0.5781	0.0086	0.0153	1.0079	Phenol red	C19H14O5S		down	negative
0.598_211.0358	0.5767	0.0005	0.0013	1.2373	Phosphocreatine	C4H10N3O5P	HMDB0001511	down	negative
0.627_178.0478	0.5718	0.0033	0.0066	1.1379	L-gulonolactone	C6H10O6	HMDB0003466	down	negative
0.66_449.8467	0.5625	0.0001	0.0003	1.091		C7H13ClO6P2S5		down	negative
0.666_595.8507	0.5557	0.001	0.0023	1.0817		C12H8ClN2O16P3S		down	negative
0.664_239.939	0.5538	0	0.0001	1.126		C2H4ClN6P3		down	negative
0.645_353.7697	0.5462	0.0004	0.0011	1.0184				down	negative
0.631_213.8942	0.5354	0.0003	0.0008	1.0826				down	negative
0.66_439.818	0.5349	0.0053	0.0101	1.0496				down	negative
0.651_305.84	0.5316	0.0022	0.0047	1.1133		C3H2ClN2O3P3S2		down	negative
0.669_255.9336	0.531	0	0.0001	1.1598		CH2N6O4P2S		down	negative
0.625_217.9357	0.5289	0.0002	0.0006	1.1096	[similar to: orotidine 5'-monophosphate; δmass: -150.0900 da]			down	negative
0.662_507.805	0.5288	0.0067	0.0122	1.1104				down	negative
0.645_223.923	0.5215	0.0019	0.0041	1.1151		C4H4ClN2OP3		down	negative
0.667_385.943	0.5176	0.0001	0.0004	1.1773		C5H4N6O11P2		down	negative
0.637_97.9294	0.5133	0.0008	0.002	1.141	[similar to: adenosine 5'-phosphosulfate; δmass: -329.0905 da]			down	negative
0.667_388.1221	0.5093	0.0003	0.001	1.1756		C13H24O13		down	negative
0.648_363.7988	0.4917	0.0068	0.0125	1.2524		C5H2O5P2S5		down	negative
0.686_131.0695	0.4906	0	0.0002	1.4294	Creatine	C4H9N3O2	HMDB0000064	down	negative
0.664_307.9265	0.4767	0	0.0001	1.2713		C4H6ClN2O8PS		down	negative
0.658_229.9101	0.4763	0.0001	0.0004	1.2464				down	negative
0.625_333.8531	0.4627	0.0004	0.0012	1.2712		C5H4ClN2O3PS4		down	negative
0.669_114.0317	0.4626	0.0018	0.0039	1.1978	4-hydroxy-5-methylfuran-3(2h)-one	C5H6O3	HMDB0031859	down	negative
0.667_453.9303	0.4587	0.0001	0.0005	1.297		C7H8N2O17P2		down	negative
5.54_290.1089	0.4547	0.0108	0.0187	1.1719		C15H18N2O2S		down	negative
0.634_293.8347	0.4547	0	0.0002	1.2545				down	negative
5.541_334.0989	0.453	0.0097	0.0171	1.1691	Benzylpenicillin	C16H18N2O4S	HMDB0015186	down	negative
0.663_517.834	0.4514	0.0001	0.0003	1.3157		C6H9ClN6O6P2S5		down	negative
0.631_331.8086	0.4461	0	0.0001	1.2574		C6H4ClP3S4		down	negative
0.669_519.8311	0.4418	0	0.0001	1.3335		C3H11N2O14P3S4		down	negative
5.541_193.0562	0.4408	0.008	0.0144	1.1789		C10H11NOS		down	negative
0.658_245.9048	0.4389	0.0001	0.0004	1.3256		C4H3ClO6S2		down	negative
0.622_275.8942	0.4344	0.0002	0.0006	1.2671		C2H2ClN4O4PS2		down	negative
0.64_125.0147	0.4344	0	0.0001	1.4766	Taurine	C2H7NO3S	HMDB0000251	down	negative
0.668_521.9172	0.4287	0.0001	0.0004	1.3199		C7H13N2O17P3S		down	negative
0.668_663.8392	0.4278	0.0001	0.0003	1.3445				down	negative
0.65_163.9199	0.4264	0.0001	0.0005	1.3458	Chloral hydrate	C2H3Cl3O2	HMDB0060451	down	negative
0.638_213.8468	0.4263	0.0001	0.0003	1.3262				down	negative
2.439_228.111	0.4249	0.0001	0.0004	1.2269	Tetraacetylethylenediamine	C10H16N2O4	HMDB0040573	down	negative
0.664_585.822	0.4153	0	0.0003	1.3799		C9H14ClO13P3S4		down	negative
0.633_273.8496	0.4094	0.0001	0.0004	1.3826		C3H2ClN2OP3S2		down	negative
0.659_441.815	0.4024	0.0003	0.001	1.4026		C4H10ClO8P3S4		down	negative
0.634_235.876	0.3985	0.0001	0.0003	1.4052				down	negative
0.661_313.8922	0.3981	0	0.0001	1.4045		C4H2ClN4O5P3		down	negative
0.664_375.9142	0.3979	0	0.0002	1.4244		C4H3ClN6O9P2		down	negative
0.65_161.9228	0.3959	0.0002	0.0008	1.3984				down	negative
0.652_373.8277	0.3938	0	0.0002	1.4288		C2H6ClN4O2P3S4		down	negative
5.54_397.0946	0.3887	0.0269	0.0416	1.2348		C16H19N3O7S		down	negative
0.763_294.0563	0.3885	0.0002	0.0006	1.3778	2-hydroxy-1,2-diphenylethyl hydrogen sulfate	C14H14O5S	HMDB0135202	down	negative
0.659_297.8977	0.3824	0	0.0001	1.4483		C5H12ClPS5		down	negative
0.634_295.8318	0.3784	0.0001	0.0003	1.4335		C6HO2PS5		down	negative
0.633_237.873	0.3774	0.0001	0.0003	1.4707		CH2O6S4		down	negative
0.685_189.0282	0.3766	0	0.0001	1.5107		C6H7NO6		down	negative
0.684_267.0442	0.3673	0	0	1.6302		C5H9N5O8		down	negative
0.656_378.0933	0.3653	0.0001	0.0003	1.4525	2-(1,5-dihydroxy-4-oxo-2-cyclohexen-1-yl)-5-hydroxy-3,6,7-trimethoxy-4h-chromen-4-one	C18H18O9	HMDB0130284	down	negative
0.635_353.7905	0.3643	0	0.0002	1.4631		C3H2ClN2O2P3S4		down	negative
0.644_279.837	0.362	0.0004	0.0012	1.5125				down	negative
0.665_443.9016	0.362	0	0.0001	1.488		C6H7ClN2O15P2		down	negative
0.646_219.8813	0.3614	0.0004	0.0011	1.4793				down	negative
0.633_333.8055	0.3557	0.0001	0.0003	1.4733		C5H2ClO3P3S3		down	negative
0.637_271.8051	0.351	0	0.0001	1.4947				down	negative
0.665_381.8795	0.3461	0.0001	0.0003	1.5383		C6H4ClO13PS		down	negative
0.642_411.7495	0.3444	0.0001	0.0003	1.4782		C2H4ClO6P3S5		down	negative
0.65_653.8096	0.3389	0	0.0001	1.4797		C18H5N6O6P3S5		down	negative
0.649_204.028	0.3342	0.0012	0.0027	1.3693	1-oxo-1,2,4-butanetricarboxylic acid	C7H8O7		down	negative
0.65_287.8687	0.3312	0.0001	0.0005	1.5371				down	negative
0.639_327.767	0.3179	0.0001	0.0003	1.5756				down	negative
0.652_289.8658	0.3156	0.0002	0.0008	1.5739		C2HClN4O3P2S2		down	negative
0.666_511.8886	0.3085	0	0.0001	1.6157		C9H7ClN2O17P2		down	negative
0.662_577.7904	0.3066	0	0.0001	1.5957		C5H9O18P3S4		down	negative
0.651_303.8635	0.3038	0.0004	0.0011	1.6646		C2H2ClN6PS4		down	negative
0.661_365.8854	0.27	0.0002	0.0008	1.7133		C8H12ClO2PS5		down	negative
0.687_257.0155	0.2674	0	0.0001	1.7667		C4H8ClN5O6		down	negative
0.656_499.7735	0.2671	0	0.0001	1.72		C4HClO18S4		down	negative
0.668_579.877	0.2641	0	0.0001	1.7182		C11H7ClN4O16P2S		down	negative
0.638_182.9733	0.2603	0	0	1.8021				down	negative
0.666_575.7938	0.2444	0.0001	0.0005	1.7834		C7H11ClO14P2S5		down	negative
0.66_423.8444	0.2425	0.0004	0.0012	1.7757		C6H3O14P3S		down	negative
0.687_325.0031	0.226	0	0	1.919		C4H15ClN5O4P3		down	negative
0.661_371.8511	0.2154	0.0002	0.0008	1.9125		C7H4ClN2O4P3S2		down	negative
0.647_347.8248	0.2062	0	0.0001	1.8589		C4H2ClN4OPS5		down	negative
0.667_569.8484	0.1985	0.0004	0.0011	1.9422		C5H7ClN6O16S4		down	negative
0.644_345.8276	0.189	0.0001	0.0004	1.9791				down	negative
0.663_433.873	0.1881	0.0004	0.0011	2.0166		C6H14ClN2O4P3S4		down	negative
0.65_357.8537	0.1662	0.0001	0.0003	2.0824		C4H5ClO9P2S2		down	negative
2.956_318.133	0.153	0.0001	0.0004	2.0963	His-tyr	C15H18N4O4		down	negative
0.664_501.8603	0.1486	0.0004	0.0012	2.1915		C11H7ClN4O7S5		down	negative
0.666_493.8286	0.1453	0.0001	0.0003	2.151		C7H2ClN4O12P3S		down	negative
9.217_422.2341	0.1175	0.006	0.0111	1.5909	1,4-bis(2-ethylhexyl) sulfosuccinate	C20H38O7S	HMDB0251779	down	negative
9.219_490.2211	0.0836	0.0028	0.0058	1.7704	Beta-d-glucosyl crocetin	C26H34O9		down	negative

## Sheet: Table S2
Table S2. Pathway analysis for differential metabolites
Pathways	Hits	P value	FDR	Metabolite
Glycine, serine and threonine metabolism	7	1.47e-06	0.00012323	L-Serine; Choline; 3-Phospho-D-glycerate; Glycine; O-Phospho-L-serine; Creatine; Pyruvate
Cysteine and methionine metabolism	6	2.4e-05	0.0010068	L-Serine; L-Methionine; O-Phospho-L-serine; Pyruvate; Ophthalmate; 3-Phospho-D-glycerate
Arginine and proline metabolism	6	5.58e-05	0.0015637	Creatine; 4-Aminobutanoate; L-Proline; L-Glutamate; Phosphocreatine; Pyruvate
Aminoacyl-tRNA biosynthesis	5	0.0018343	0.03852	Glycine; L-Serine; L-Methionine; L-Proline; L-Glutamate
Glyoxylate and dicarboxylate metabolism	4	0.0028159	0.047308	L-Serine; Glycine; L-Glutamate; Pyruvate
Purine metabolism	5	0.0070148	0.098207	3',5'-Cyclic AMP; IMP; Adenosine; Hypoxanthine; dGTP
Glycolysis/Gluconeogenesis	3	0.012603	0.14439	Pyruvate; 3-Phospho-D-glycerate; 2,3-Bisphospho-D-glycerate
Glutathione metabolism	3	0.01547	0.14439	Glycine; L-Glutamate; Cys-Gly
Alanine, aspartate and glutamate metabolism	3	0.01547	0.14439	L-Glutamate; 4-Aminobutanoate; Pyruvate
Butanoate metabolism	2	0.032529	0.27324	4-Aminobutanoate; L-Glutamate

## Sheet: Table S3
Table S3. Differentially expressed proteins between the PEDV-infected and uninfected groups
Gene Name	Protein_ID	Description	Mass	Mean_Ratio_PTRE-VS-CTRJ	Pvalue_PTRE-VS-CTRJ
JMJD6	tr|A0A287BSV9|A0A287BSV9_PIG	Jumonji domain containing 6, arginine demethylase and lysine hydroxylase OS=Sus scrofa OX=9823 GN=JMJD6 PE=4 SV=2	36886.5	1.26445	0.00372109
XDH	tr|A0A5G2QBL2|A0A5G2QBL2_PIG	Xanthine dehydrogenase OS=Sus scrofa OX=9823 GN=XDH PE=1 SV=1	135743	1.22202	0.000103162
ZNF148	tr|A0A4X1TKT3|A0A4X1TKT3_PIG	Zinc finger protein 148 OS=Sus scrofa OX=9823 GN=ZNF148 PE=4 SV=2	16135.6	1.24122	0.000105545
PPTC7	tr|A0A4X1U4H3|A0A4X1U4H3_PIG	Protein phosphatase OS=Sus scrofa OX=9823 GN=PPTC7 PE=3 SV=2	33237.4	1.30647	0.00476988
ERCC5	tr|A0A287AD56|A0A287AD56_PIG	XPGN domain-containing protein OS=Sus scrofa OX=9823 PE=3 SV=1	27062.3	1.22089	4.38595e-05
SMDT1	tr|A0A4X1W3P7|A0A4X1W3P7_PIG	Essential MCU regulator, mitochondrial OS=Sus scrofa OX=9823 GN=SMDT1 PE=3 SV=1	11538.2	1.44253	2.28966e-09
ATP5MD	tr|A0A4X1TQQ5|A0A4X1TQQ5_PIG	ATP synthase membrane subunit DAPIT OS=Sus scrofa OX=9823 GN=ATP5MK PE=1 SV=1	6460.39	1.34823	2.81073e-06
CWC15	tr|F1STJ3|F1STJ3_PIG	Spliceosome-associated protein CWC15 homolog OS=Sus scrofa OX=9823 GN=CWC15 PE=1 SV=2	26142.2	1.2287	6.75264e-05
DAZAP1	tr|A0A287BHT9|A0A287BHT9_PIG	RRM domain-containing protein OS=Sus scrofa OX=9823 GN=DAZAP1 PE=1 SV=1	13909.9	1.25122	3.64248e-11
HMGA1	tr|B6CVL5|B6CVL5_PIG	High mobility group AT-hook 1 transcript variant 2 OS=Sus scrofa OX=9823 GN=HMGA1 PE=2 SV=1	10624.6	1.27708	0.0258956
ACTN2	tr|I3LCP0|I3LCP0_PIG	Actinin alpha 2 OS=Sus scrofa OX=9823 GN=ACTN2 PE=1 SV=3	98271.6	1.31851	5.57327e-06
LOC100739365	tr|A0A286ZWQ9|A0A286ZWQ9_PIG	Uncharacterized protein OS=Sus scrofa OX=9823 GN=LOC100739365 PE=3 SV=1	27548	1.28669	0.00275855
TIMM8A	tr|A0A4X1W4Y0|A0A4X1W4Y0_PIG	Mitochondrial import inner membrane translocase subunit OS=Sus scrofa OX=9823 GN=TIMM8A PE=1 SV=1	11244.4	1.25525	0.00275783
CDC26	tr|A0A4X1V2N3|A0A4X1V2N3_PIG	Anaphase-promoting complex subunit CDC26 OS=Sus scrofa OX=9823 GN=CDC26 PE=3 SV=1	9745.98	1.20522	0.000663084
ATP5F1E	tr|A0A4X1UTW2|A0A4X1UTW2_PIG	ATP synthase, H+ transporting, mitochondrial F1 complex, epsilon subunit OS=Sus scrofa OX=9823 GN=ATP5E PE=1 SV=1	5785.11	1.23038	0.000700092
MYO3B	tr|A0A286ZT24|A0A286ZT24_PIG	Uncharacterized protein OS=Sus scrofa OX=9823 GN=MYO3B PE=3 SV=2	147762	1.32827	2.8597e-06
GRB10	tr|A0A4X1T7S7|A0A4X1T7S7_PIG	Uncharacterized protein OS=Sus scrofa OX=9823 GN=GRB10 PE=3 SV=1	63033	1.23831	4.77809e-05
ARHGAP39	tr|A0A5G2Q7Q3|A0A5G2Q7Q3_PIG	Rho GTPase activating protein 39 OS=Sus scrofa OX=9823 GN=ARHGAP39 PE=4 SV=1	122043	1.26098	3.77778e-07
GDF9B	tr|Q9GL53|Q9GL53_PIG	Growth differentiation factor 9B (Fragment) OS=Sus scrofa OX=9823 GN=GDF9B PE=3 SV=1	19830.1	3.56635	0.0100795
BANF1	tr|A0A4X1UGA0|A0A4X1UGA0_PIG	BAF nuclear assembly factor 1 OS=Sus scrofa OX=9823 GN=BANF1 PE=1 SV=1	10248.1	1.32925	0.00589238
CPS1	tr|A0A481B0J7|A0A481B0J7_PIG	Carbamoyl-phosphate synthase ammonia, mitochondrial OS=Sus scrofa OX=9823 PE=3 SV=1	165604	1.22555	0.00693543
ARNTL2	tr|F1SG81|F1SG81_PIG	Uncharacterized protein OS=Sus scrofa OX=9823 GN=ARNTL2 PE=4 SV=4	65069.4	1.36186	0.0491046
KRT19	tr|A0A480J3V8|A0A480J3V8_PIG	Keratin, type I cytoskeletal 19 OS=Sus scrofa OX=9823 PE=3 SV=1	44168.4	1.32952	1.03309e-07
CDHR1	tr|A0A4X1SEQ8|A0A4X1SEQ8_PIG	Uncharacterized protein OS=Sus scrofa OX=9823 GN=CDHR1 PE=4 SV=1	86932.4	1.46536	0.00393068
ADAM9	tr|A0A0B8RZS3|A0A0B8RZS3_PIG	ADAM metallopeptidase domain 9 OS=Sus scrofa OX=9823 GN=ADAM9 PE=1 SV=1	92886.8	1.22276	0.00131302
KCTD12	tr|F1RHE6|F1RHE6_PIG	Potassium channel tetramerization domain containing 12 OS=Sus scrofa OX=9823 GN=KCTD12 PE=1 SV=2	35541.7	1.33925	1.38077e-05
FIP1L1	tr|A0A287BRC8|A0A287BRC8_PIG	FIP1-like 1 protein OS=Sus scrofa OX=9823 GN=FIP1L1 PE=1 SV=2	60005.5	1.21396	8.03171e-05
SCD	sp|O02858|SCD_PIG	Stearoyl-CoA desaturase OS=Sus scrofa OX=9823 GN=SCD PE=2 SV=2	41559.4	1.38202	2.16912e-06
UNC13C	tr|A0A4X1TCY7|A0A4X1TCY7_PIG	Uncharacterized protein OS=Sus scrofa OX=9823 GN=UNC13C PE=4 SV=1	228854	1.3661	1.49133e-09
PTPRM	tr|A0A480N6W1|A0A480N6W1_PIG	Receptor-type tyrosine-protein phosphatase mu isoform 2 OS=Sus scrofa OX=9823 PE=4 SV=1	110404	1.29535	0.000745635
GYG2	tr|A0A4X1TRT6|A0A4X1TRT6_PIG	Uncharacterized protein OS=Sus scrofa OX=9823 GN=GYG2 PE=4 SV=1	43933	1.26435	0.00491481
OLFR24	tr|O77553|O77553_PIG	Olfactory receptor (Fragment) OS=Sus scrofa OX=9823 PE=2 SV=1	17834.2	1.2306	6.03083e-05
ABHD4	tr|A0A287AX52|A0A287AX52_PIG	Abhydrolase domain containing 4, N-acyl phospholipase B OS=Sus scrofa OX=9823 GN=ABHD4 PE=1 SV=2	33008.1	1.21036	0.00172777
TM9SF3	tr|A0A5G2QAJ9|A0A5G2QAJ9_PIG	Transmembrane 9 superfamily member OS=Sus scrofa OX=9823 GN=TM9SF3 PE=1 SV=1	61569.6	1.20239	0.000111973
BHMT	tr|A0A4X1T208|A0A4X1T208_PIG	Betaine--homocysteine S-methyltransferase OS=Sus scrofa OX=9823 GN=BHMT PE=2 SV=1	27910.2	1.43085	0.00428945
RWDD4	tr|A0A4X1VWW0|A0A4X1VWW0_PIG	RWD domain-containing protein OS=Sus scrofa OX=9823 GN=RWDD4 PE=4 SV=1	21114.5	1.32373	0.00119223
LYRM7	tr|A0A4X1UH07|A0A4X1UH07_PIG	Uncharacterized protein OS=Sus scrofa OX=9823 GN=LYRM7 PE=4 SV=1	11424.2	1.23386	0.00335121
DCUN1D5	tr|A0A4X1TQM8|A0A4X1TQM8_PIG	DCN1-like protein OS=Sus scrofa OX=9823 GN=DCUN1D5 PE=4 SV=1	20194.9	1.2071	5.84937e-05
MAT1A	tr|A0A5G2QIV9|A0A5G2QIV9_PIG	S-adenosylmethionine synthase OS=Sus scrofa OX=9823 GN=MAT1A PE=1 SV=1	39365.7	1.22552	0.0261565
LIG4	tr|A0A4X1U3A0|A0A4X1U3A0_PIG	DNA ligase OS=Sus scrofa OX=9823 PE=3 SV=1	104797	1.20141	0.00709543
GNG12	tr|A0A4X1U1S2|A0A4X1U1S2_PIG	Guanine nucleotide-binding protein subunit gamma OS=Sus scrofa OX=9823 GN=GNG12 PE=2 SV=1	8160.13	1.30814	1.01699e-09
JHY	tr|A0A4X1VEU6|A0A4X1VEU6_PIG	Junctional cadherin complex regulator OS=Sus scrofa OX=9823 GN=JHY PE=4 SV=2	87524.4	1.86907	1.24291e-05
DOCK2	tr|A0A4X1U422|A0A4X1U422_PIG	Uncharacterized protein OS=Sus scrofa OX=9823 GN=DOCK2 PE=3 SV=1	200885	1.24491	8.2945e-05
SDCBP2	tr|A0A5G2QRN9|A0A5G2QRN9_PIG	Syndecan binding protein 2 OS=Sus scrofa OX=9823 GN=SDCBP2 PE=4 SV=1	31616.8	1.50353	1.54381e-08
LAMB3	tr|A0A4X1THV0|A0A4X1THV0_PIG	Uncharacterized protein OS=Sus scrofa OX=9823 PE=4 SV=1	132963	1.27879	4.00881e-14
ESYT3	tr|I3LBZ0|I3LBZ0_PIG	Extended synaptotagmin 3 OS=Sus scrofa OX=9823 GN=ESYT3 PE=3 SV=2	100472	1.41402	5.23076e-05
NFI	sp|P14057|NFIL_PIG	Nuclear factor 1 (Fragment) OS=Sus scrofa OX=9823 GN=NFI PE=1 SV=1	26412.9	1.35727	0.00595956
ATP6	tr|W5QT72|W5QT72_PIG	ATP synthase subunit a OS=Sus scrofa OX=9823 GN=ATP6 PE=3 SV=1	24965.6	1.43089	0.00527776
SPN	tr|A0A5G2R0K6|A0A5G2R0K6_PIG	Sialophorin OS=Sus scrofa OX=9823 GN=SPN PE=4 SV=1	41148	1.24277	0.000119012
OR5D13	tr|A0A287ASN7|A0A287ASN7_PIG	Olfactory receptor OS=Sus scrofa OX=9823 PE=3 SV=1	31228.5	1.24296	0.00194394
CDC123	tr|A0A4X1TFY3|A0A4X1TFY3_PIG	Cell division cycle protein 123 homolog OS=Sus scrofa OX=9823 GN=CDC123 PE=1 SV=1	34187.9	1.2334	0.00670668
MIER1	tr|A0A481C1W0|A0A481C1W0_PIG	Mesoderm induction early response protein 1 isoform c OS=Sus scrofa OX=9823 PE=4 SV=1	32946.8	1.24616	2.33845e-07
SPATA5L1	tr|D5K894|D5K894_PIG	Spermatogenesis associated 5-like 1 OS=Sus scrofa OX=9823 GN=SPATA5L1 PE=2 SV=1	81410.9	2.14577	0.0143374
SAFB2	tr|A0A4X1VLE9|A0A4X1VLE9_PIG	Uncharacterized protein OS=Sus scrofa OX=9823 PE=4 SV=1	101212	1.23156	0.00858063
ANGPT1	tr|A0A4X1TH61|A0A4X1TH61_PIG	Angiopoietin-1 OS=Sus scrofa OX=9823 GN=ANGPT1 PE=4 SV=11	57914.4	1.21276	0.00462874
USP40	tr|A0A4X1U7F3|A0A4X1U7F3_PIG	USP domain-containing protein OS=Sus scrofa OX=9823 GN=USP40 PE=4 SV=1	128971	1.53358	0.0201043
IREB2	tr|F1RKU5|F1RKU5_PIG	Iron-responsive element-binding protein 2 OS=Sus scrofa OX=9823 GN=IREB2 PE=3 SV=3	106041	1.24715	4.31214e-06
Histone H2B	tr|Q29574|Q29574_PIG	Histone H2B (Fragment) OS=Sus scrofa OX=9823 PE=2 SV=1	7608.02	1.23733	0.0104712
TNRC6B	tr|A0A4X1VVU7|A0A4X1VVU7_PIG	Trinucleotide repeat containing adaptor 6B OS=Sus scrofa OX=9823 GN=TNRC6B PE=3 SV=1	109430	1.29917	0.000830552
FDFT1	tr|A0A480MSS1|A0A480MSS1_PIG	Squalene synthase OS=Sus scrofa OX=9823 PE=3 SV=1	41146.7	1.23868	3.5871e-05
KLC3	tr|A0A480QKN9|A0A480QKN9_PIG	Kinesin light chain OS=Sus scrofa OX=9823 PE=3 SV=1	44359.8	1.42157	0.000295657
DUSP11	tr|A0A286ZY08|A0A286ZY08_PIG	Dual specificity phosphatase 11 OS=Sus scrofa OX=9823 GN=DUSP11 PE=4 SV=2	32749.8	1.26891	0.000411877
TRAF7	tr|A0A4X1VWG6|A0A4X1VWG6_PIG	Uncharacterized protein OS=Sus scrofa OX=9823 PE=4 SV=1	74451.8	1.23562	2.20708e-05
RBP4	sp|P27485|RET4_PIG	Retinol-binding protein 4 OS=Sus scrofa OX=9823 GN=RBP4 PE=1 SV=2	23376.3	1.71791	6.7564e-11
MMP17	tr|A0A4X1UPV2|A0A4X1UPV2_PIG	ZnMc domain-containing protein OS=Sus scrofa OX=9823 PE=3 SV=1	58133.4	1.56159	0.000189405
PRKCE	tr|A0A4X1SHZ6|A0A4X1SHZ6_PIG	Protein kinase C OS=Sus scrofa OX=9823 GN=PRKCE PE=3 SV=1	67722.9	1.22243	0.00127377
MTMR10	tr|A0A481BFK7|A0A481BFK7_PIG	Myotubularin-related protein 10 OS=Sus scrofa OX=9823 PE=3 SV=1	75833.7	1.21153	0.00221536
CAVIN3	tr|A0A4X1SEN1|A0A4X1SEN1_PIG	Uncharacterized protein OS=Sus scrofa OX=9823 GN=CAVIN3 PE=3 SV=1	27316.4	1.22355	3.64698e-06
IL20RA	tr|F1S690|F1S690_PIG	Interleukin 20 receptor subunit alpha OS=Sus scrofa OX=9823 GN=IL20RA PE=4 SV=3	64473.9	1.26889	0.00549219
ATP5ME	sp|Q9MYT8|ATP5I_PIG	ATP synthase subunit e, mitochondrial OS=Sus scrofa OX=9823 GN=ATP5ME PE=1 SV=4	8208.48	1.29151	0.00865396
RILPL1	tr|A0A4X1ULF4|A0A4X1ULF4_PIG	Rab interacting lysosomal protein like 1 OS=Sus scrofa OX=9823 GN=RILPL1 PE=1 SV=4	44658	1.22249	0.00732505
ASB18	tr|F1SM12|F1SM12_PIG	Ankyrin repeat and SOCS box containing 18 OS=Sus scrofa OX=9823 GN=ASB18 PE=4 SV=4	46321.8	1.20672	0.00859782
DNASE1L3	tr|A0A480JLA1|A0A480JLA1_PIG	Deoxyribonuclease OS=Sus scrofa OX=9823 GN=DNASE1L3 PE=3 SV=1	35517.3	1.89139	0.000615056
ERG28	tr|D0G0B2|D0G0B2_PIG	Uncharacterized protein OS=Sus scrofa OX=9823 GN=0610007P14Rik PE=2 SV=1	15804.4	1.26261	5.80769e-06
SYDE1	tr|A0A0B8RT35|A0A0B8RT35_PIG	Synapse defective Rho GTPase homolog 1 OS=Sus scrofa OX=9823 GN=SYDE1 PE=4 SV=1	80725.9	4.40425	0.0012001
LOC102166000	tr|A0A5G2QT36|A0A5G2QT36_PIG	Uncharacterized protein OS=Sus scrofa OX=9823 GN=LOC102166000 PE=4 SV=1	158172	1.20819	2.72691e-06
DNAH3	tr|A0A4X1VEQ5|A0A4X1VEQ5_PIG	Uncharacterized protein OS=Sus scrofa OX=9823 PE=3 SV=1	76269.6	1.75395	2.05807e-05
FLNC	tr|A0A5G2QY64|A0A5G2QY64_PIG	Filamin C OS=Sus scrofa OX=9823 GN=FLNC PE=1 SV=1	282476	1.31981	4.45473e-14
ARPC3	tr|A0A287ALZ4|A0A287ALZ4_PIG	Actin-related protein 2/3 complex subunit 3 OS=Sus scrofa OX=9823 GN=ARPC3 PE=3 SV=1	17949.9	1.20037	3.73985e-07
CDK9	tr|A0A0B8RZP0|A0A0B8RZP0_PIG	CDK9 OS=Sus scrofa OX=9823 GN=CDK9 PE=2 SV=1	43115.4	1.30943	0.00254421
COQ9	tr|A0A480PNJ5|A0A480PNJ5_PIG	Ubiquinone biosynthesis protein OS=Sus scrofa OX=9823 GN=COQ9 PE=3 SV=1	35414.7	1.36431	0.00130643
LMCD1	tr|A0A5G2QVD0|A0A5G2QVD0_PIG	LIM and cysteine-rich domains protein 1 OS=Sus scrofa OX=9823 GN=LMCD1 PE=1 SV=1	26954.5	1.21913	4.20638e-05
PHLDA1	tr|A0A4X1VYU4|A0A4X1VYU4_PIG	PH domain-containing protein OS=Sus scrofa OX=9823 PE=4 SV=1	28054.3	1.22417	5.80016e-07
GNB4	tr|A0A287A365|A0A287A365_PIG	Uncharacterized protein OS=Sus scrofa OX=9823 GN=GNB4 PE=3 SV=1	38266.3	1.21832	5.46469e-06
MORC1	tr|A0A5G2RNE1|A0A5G2RNE1_PIG	MORC family CW-type zinc finger 1 OS=Sus scrofa OX=9823 GN=MORC1 PE=4 SV=1	104078	1.22439	0.00234453
STX11	tr|F1S731|F1S731_PIG	Syntaxin 11 OS=Sus scrofa OX=9823 GN=STX11 PE=3 SV=1	33856	1.50066	1.55175e-09
CCDC167	tr|A0A5G2RJC6|A0A5G2RJC6_PIG	Coiled-coil domain-containing protein 167 OS=Sus scrofa OX=9823 GN=CCDC167 PE=4 SV=1	10620.5	1.36805	1.83815e-07
ND3	tr|A0A077ERM2|A0A077ERM2_PIG	NADH-ubiquinone oxidoreductase chain 3 OS=Sus scrofa domesticus OX=9825 GN=ND3 PE=3 SV=1	13045.8	1.22165	0.00104792
CFAP43	tr|I3LUX5|I3LUX5_PIG	Cilia- and flagella-associated protein 43 OS=Sus scrofa OX=9823 GN=CFAP43 PE=3 SV=3	188321	1.213	0.00915742
BRK1	tr|A0A4X1UQQ5|A0A4X1UQQ5_PIG	Uncharacterized protein OS=Sus scrofa OX=9823 PE=3 SV=1	10677.3	1.22274	8.22593e-07
TMEM181	tr|A0A480HX35|A0A480HX35_PIG	Transmembrane protein 181 OS=Sus scrofa OX=9823 PE=4 SV=1	50266.3	1.21212	8.18051e-08
GTF2IRD1	tr|F1RJL4|F1RJL4_PIG	GTF2I repeat domain containing 1 OS=Sus scrofa OX=9823 GN=GTF2IRD1 PE=4 SV=4	103095	1.25395	0.000550764
KRT19	tr|A0A480IFL7|A0A480IFL7_PIG	Keratin, type I cytoskeletal 19 OS=Sus scrofa OX=9823 PE=3 SV=1	44546.6	1.43405	3.37115e-09
ARHGAP17	tr|A0A480NPR2|A0A480NPR2_PIG	Rho GTPase-activating protein 17 isoform 1 OS=Sus scrofa OX=9823 PE=4 SV=1	73502.2	1.25374	0.000205093
WDR19	tr|A0A480KVB4|A0A480KVB4_PIG	WD repeat-containing protein 19 isoform 1 OS=Sus scrofa OX=9823 PE=4 SV=1	116488	1.23873	0.00345953
A0A4X1V7G5	tr|A0A4X1V7G5|A0A4X1V7G5_PIG	Uncharacterized protein OS=Sus scrofa OX=9823 PE=4 SV=1	23209.1	0.716109	0.00026797
A2M	tr|A0A4X1U4V6|A0A4X1U4V6_PIG	Uncharacterized protein OS=Sus scrofa OX=9823 GN=A2M PE=3 SV=1	160668	0.675744	7.2577e-08
AAR2	tr|A0A5G2QR57|A0A5G2QR57_PIG	AAR2 splicing factor homolog OS=Sus scrofa OX=9823 GN=AAR2 PE=3 SV=1	42304.1	0.812072	0.000359402
ABR	tr|A0A287B4B6|A0A287B4B6_PIG	Active breakpoint cluster region-related protein OS=Sus scrofa OX=9823 GN=ABR PE=4 SV=1	74095.4	0.819383	0.00343503
ACTC1	tr|A0A287A6R7|A0A287A6R7_PIG	Uncharacterized protein OS=Sus scrofa OX=9823 GN=ACTC1 PE=3 SV=1	39420.5	0.742858	0.00239728
ADA	tr|A0A5G2R146|A0A5G2R146_PIG	Adenosine deaminase OS=Sus scrofa OX=9823 GN=ADA PE=1 SV=1	38464.3	0.484208	0.000384388
ADAM12	tr|A0A480MZB4|A0A480MZB4_PIG	Disintegrin and metalloproteinase domain-containing protein 12 isoform 1 preproprotein OS=Sus scrofa OX=9823 PE=4 SV=1	67676.7	0.657271	2.94961e-05
AFG3L2	tr|A0A481BAI7|A0A481BAI7_PIG	AFG3-like protein 2 OS=Sus scrofa OX=9823 PE=3 SV=1	83063.3	0.826153	0.000197466
AFP	tr|A0A5G2QUE9|A0A5G2QUE9_PIG	Alpha-fetoprotein OS=Sus scrofa OX=9823 GN=AFP PE=1 SV=1	69836.3	0.455984	2.4171e-14
AGER	tr|F1ABR2|F1ABR2_PIG	Advanced glycosylation end product-specific receptor variant 8 OS=Sus scrofa OX=9823 GN=Ager PE=2 SV=1	35759.4	0.667971	8.94179e-14
AKT1S1	tr|A0A4X1VWX0|A0A4X1VWX0_PIG	Uncharacterized protein OS=Sus scrofa OX=9823 GN=AKT1S1 PE=4 SV=1	27454.5	0.806661	0.0197452
ALB	tr|A0A287AFS2|A0A287AFS2_PIG	Albumin OS=Sus scrofa OX=9823 GN=ALB PE=1 SV=2	58192.5	0.65171	5.57185e-12
AMFR	tr|A0A4X1UD79|A0A4X1UD79_PIG	AE3 ubiquitin-protein ligase AMFR OS=Sus scrofa OX=9823 GN=AMFR PE=2 SV=1	73947.2	0.764491	4.18981e-05
ANKRD29	tr|A0A4X1VPY0|A0A4X1VPY0_PIG	Ankyrin repeat domain 29 OS=Sus scrofa OX=9823 GN=ANKRD29 PE=4 SV=3	29466.4	0.820758	0.0011124
ANKRD39	tr|A0A287ANU6|A0A287ANU6_PIG	Ankyrin_rpt-contain_dom domain-containing protein OS=Sus scrofa OX=9823 GN=ANKRD39 PE=4 SV=1	20012.7	0.761565	0.000637271
ANKRD46	tr|A0A4X1TR12|A0A4X1TR12_PIG	Ankyrin repeat domain 46 OS=Sus scrofa OX=9823 GN=ANKRD46 PE=1 SV=1	25524	0.831248	2.26987e-06
APOA1	tr|A0A4X1T1F8|A0A4X1T1F8_PIG	Apolipoprotein A-I OS=Sus scrofa OX=9823 GN=APOA1 PE=3 SV=2	30293.7	0.776838	1.40435e-08
APOA4	sp|O46409|APOA4_PIG	Apolipoprotein A-IV OS=Sus scrofa OX=9823 GN=APOA4 PE=2 SV=1	43249.7	0.730914	2.77329e-10
ARMC4	tr|A0A4X1TRL1|A0A4X1TRL1_PIG	Uncharacterized protein OS=Sus scrofa OX=9823 PE=4 SV=1	28620.5	0.730414	0.00562819
BBS2	tr|A0A480MGQ3|A0A480MGQ3_PIG	Bardet-Biedl syndrome 2-like protein OS=Sus scrofa OX=9823 PE=4 SV=1	21713.9	0.733001	0.000155333
BOD1L1	tr|A0A4X1SG85|A0A4X1SG85_PIG	Uncharacterized protein OS=Sus scrofa OX=9823 GN=BOD1L1 PE=4 SV=1	300308	0.832178	0.00168941
BTD	tr|A0A0B8RZQ6|A0A0B8RZQ6_PIG	Biotinidase OS=Sus scrofa OX=9823 GN=BTD PE=1 SV=3	57778.3	0.826943	0.00149674
BUD23	tr|A0A480V3T3|A0A480V3T3_PIG	Putative 18S rRNA (Guanine-N(7))-methyltransferase OS=Sus scrofa OX=9823 PE=3 SV=1	28303.3	0.822166	0.000102807
C10H9orf72	tr|F1SE55|F1SE55_PIG	Chromosome 10 C9orf72 homolog OS=Sus scrofa OX=9823 GN=C10H9orf72 PE=4 SV=2	52361.9	0.760478	0.00858245
C2H19orf53	tr|A0A4X1SJW1|A0A4X1SJW1_PIG	Chromosome 2 C19orf53 homolog OS=Sus scrofa OX=9823 GN=C2H19orf53 PE=3 SV=1	10499.1	0.832784	0.000166891
C3	tr|A0A5G2QME3|A0A5G2QME3_PIG	C3-beta-c OS=Sus scrofa OX=9823 GN=C3 PE=1 SV=1	179717	0.707465	3.50293e-09
C4A	tr|A0A480NJR4|A0A480NJR4_PIG	Complement C4-A isoform 2 preproprotein OS=Sus scrofa OX=9823 PE=4 SV=1	157539	0.672063	4.32218e-09
C5H12orf50	tr|A0A5G2QAC1|A0A5G2QAC1_PIG	Chromosome 5 C12orf50 homolog OS=Sus scrofa OX=9823 GN=C5H12orf50 PE=4 SV=1	43167.4	0.829969	1.96021e-05
C6	tr|A0A4X1T1V4|A0A4X1T1V4_PIG	Complement component C6 OS=Sus scrofa OX=9823 PE=3 SV=1	101403	0.781816	7.92368e-06
C8A	tr|A0A480T023|A0A480T023_PIG	Complement component C8 alpha chain preproprotein OS=Sus scrofa OX=9823 PE=3 SV=1	51448.9	0.504133	4.42848e-19
CAMTA2	tr|A0A287AF81|A0A287AF81_PIG	Calmodulin binding transcription activator 2 OS=Sus scrofa OX=9823 GN=CAMTA2 PE=3 SV=2	121438	0.693844	3.10488e-05
CASTOR2	tr|A0A480MPK0|A0A480MPK0_PIG	Uncharacterized protein OS=Sus scrofa OX=9823 GN=CASTOR2 PE=3 SV=1	36213.6	0.738921	0.000190689
CBX6	tr|A0A287AAU6|A0A287AAU6_PIG	Chromobox 6 OS=Sus scrofa OX=9823 GN=CBX6 PE=4 SV=2	43436.9	0.81259	3.13235e-08
CCDC168	tr|F1RLQ7|F1RLQ7_PIG	Uncharacterized protein OS=Sus scrofa OX=9823 PE=4 SV=4	701047	0.649443	3.36798e-13
CCDC191	tr|A0A480WRX5|A0A480WRX5_PIG	Coiled-coil domain-containing protein 191 isoform X3 OS=Sus scrofa OX=9823 PE=4 SV=1	58130.8	0.683178	0.00630838
CCDC50	tr|A0A4X1U6Z0|A0A4X1U6Z0_PIG	CCDC50_N domain-containing protein OS=Sus scrofa OX=9823 GN=CCDC50 PE=4 SV=1	35093.6	0.654785	6.71118e-11
CCNA2	tr|D5HP13|D5HP13_PIG	Cyclin-A2 OS=Sus scrofa OX=9823 PE=2 SV=1	48509	0.719833	0.00356263
CDC40	tr|A0A4X1VA12|A0A4X1VA12_PIG	Cell division cycle 40 OS=Sus scrofa OX=9823 GN=CDC40 PE=4 SV=1	66055.8	0.703411	1.02115e-08
CHRNA6	tr|A0A4X1U984|A0A4X1U984_PIG	Uncharacterized protein OS=Sus scrofa OX=9823 GN=CHRNA6 PE=3 SV=1	57159.8	0.735212	0.00142344
CHURC1	tr|A0A4X1UDW4|A0A4X1UDW4_PIG	Protein Churchill OS=Sus scrofa OX=9823 GN=CHURC1 PE=3 SV=2	16750.8	0.655034	1.0681e-05
CLSTN1	tr|A0A480TFZ0|A0A480TFZ0_PIG	Calsyntenin-1 isoform 3 OS=Sus scrofa OX=9823 PE=4 SV=1	65752.9	0.825264	0.0133122
CNBP	tr|D0G6R9|D0G6R9_PIG	CCHC-type zinc finger, nucleic acid binding protein (Fragment) OS=Sus scrofa OX=9823 GN=CNBP PE=2 SV=1	16243.1	0.796452	5.02591e-10
CNN3	tr|A4H2I3|A4H2I3_PIG	Calponin 3, acidic (Fragment) OS=Sus scrofa OX=9823 GN=CNN3 PE=3 SV=1	9096.52	0.810158	9.34142e-09
CPNE2	tr|A0A481CVI1|A0A481CVI1_PIG	Copine-2 (Fragment) OS=Sus scrofa OX=9823 PE=3 SV=1	61616.8	0.797052	1.18842e-06
CRELD2	tr|A0A4X1US06|A0A4X1US06_PIG	Protein disulfide-isomerase OS=Sus scrofa OX=9823 GN=CRELD2 PE=3 SV=1	37336.5	0.823564	0.000345361
CSTF2	tr|A0A480LMS0|A0A480LMS0_PIG	Cleavage stimulation factor subunit 2 isoform 2 OS=Sus scrofa OX=9823 PE=4 SV=1	36460.3	0.808948	1.24272e-05
CYP2J2	tr|A0A481D9C1|A0A481D9C1_PIG	Cytochrome P450 2J2 OS=Sus scrofa OX=9823 PE=3 SV=1	45366.6	0.766152	3.99777e-10
DCDC2	tr|A0A4X1VP15|A0A4X1VP15_PIG	Uncharacterized protein OS=Sus scrofa OX=9823 GN=DCDC2 PE=4 SV=1	52105.3	0.779446	1.27743e-09
DGKQ	tr|A0A4X1T490|A0A4X1T490_PIG	Diacylglycerol kinase OS=Sus scrofa OX=9823 PE=3 SV=1	87274.2	0.771907	0.00692603
DNAH8	tr|A0A4X1SPR1|A0A4X1SPR1_PIG	Uncharacterized protein OS=Sus scrofa OX=9823 GN=DNAH8 PE=3 SV=1	542059	0.792171	0.00612439
DNAJC12	tr|A0A4X1TPL6|A0A4X1TPL6_PIG	DnaJ heat shock protein family (Hsp40) member C12 OS=Sus scrofa OX=9823 GN=DNAJC12 PE=4 SV=1	12532.2	0.782853	7.16282e-09
DNPH1	tr|A0A4X1V874|A0A4X1V874_PIG	2'-deoxynucleoside 5'-phosphate N-hydrolase 1 OS=Sus scrofa OX=9823 GN=DNPH1 PE=1 SV=1	19678.1	0.807105	0.000802916
DOK1	tr|A0A4X1W6T3|A0A4X1W6T3_PIG	Docking protein 1 OS=Sus scrofa OX=9823 GN=DOK1 PE=3 SV=1	52738.4	0.791815	2.21219e-05
DYNC2LI1	tr|A0A480NVM5|A0A480NVM5_PIG	Cytoplasmic dynein 2 light intermediate chain 1 OS=Sus scrofa OX=9823 PE=3 SV=1	37346.5	0.792743	1.17423e-06
DYNLT1	tr|A0A4X1VW90|A0A4X1VW90_PIG	Dynein light chain Tctex-type 1 OS=Sus scrofa OX=9823 GN=DYNLT1 PE=1 SV=1	12684.1	0.803386	5.79165e-06
EIF1AD	tr|A0A4X1UDV5|A0A4X1UDV5_PIG	Eukaryotic translation initiation factor 1A domain-containing protein OS=Sus scrofa OX=9823 GN=EIF1AD PE=3 SV=1	19215.6	0.81948	0.00357341
EIF4G1	tr|A0A480VXI3|A0A480VXI3_PIG	Eukaryotic translation initiation factor 4 gamma 1 isoform 1 OS=Sus scrofa OX=9823 PE=3 SV=1	176972	0.761432	2.43408e-05
EPHB4	tr|A0A4X1UDR8|A0A4X1UDR8_PIG	Receptor protein-tyrosine kinase OS=Sus scrofa OX=9823 GN=EPHB4 PE=4 SV=2	104130	0.806747	1.07095e-06
ERMP1	tr|A0A287A5Y2|A0A287A5Y2_PIG	Peptidase_M28 domain-containing protein OS=Sus scrofa OX=9823 GN=ERMP1 PE=4 SV=1	93046.3	0.828326	0.017447
ETNPPL	tr|A0A4X1UWI5|A0A4X1UWI5_PIG	Ethanolamine-phosphate phospho-lyase OS=Sus scrofa OX=9823 GN=ETNPPL PE=1 SV=2	56241.3	0.825419	0.0306693
EVPLL	tr|A0A4X1UV31|A0A4X1UV31_PIG	Uncharacterized protein OS=Sus scrofa OX=9823 PE=4 SV=1	33150.6	0.677528	0.00297655
FAAP100	tr|I3LKB6|I3LKB6_PIG	FA core complex associated protein 100 OS=Sus scrofa OX=9823 GN=FAAP100 PE=4 SV=3	56508.8	0.807534	0.00539836
FAM184A	tr|A0A4X1TLE1|A0A4X1TLE1_PIG	FAM184 domain-containing protein OS=Sus scrofa OX=9823 GN=FAM184A PE=4 SV=1	127109	0.768147	1.52213e-08
FAM8A1	tr|A0A5G2R5F5|A0A5G2R5F5_PIG	Family with sequence similarity 8 member A1 OS=Sus scrofa OX=9823 GN=FAM8A1 PE=4 SV=1	40379.8	0.73114	3.7262e-05
FBXL6	tr|A0A287BC66|A0A287BC66_PIG	F-box and leucine rich repeat protein 6 OS=Sus scrofa OX=9823 GN=FBXL6 PE=4 SV=1	54876.6	0.781064	0.0051202
FECH	tr|A0A480X5N9|A0A480X5N9_PIG	Ferrochelatase OS=Sus scrofa OX=9823 PE=3 SV=1	40082.5	0.82994	1.19649e-05
FHL3	tr|Q6JLA8|Q6JLA8_PIG	Four and a half LIM domains 3 (Fragment) OS=Sus scrofa OX=9823 PE=4 SV=1	29569.7	0.802228	3.78682e-06
FRY	tr|A0A480HIB9|A0A480HIB9_PIG	Protein furry homolog OS=Sus scrofa OX=9823 PE=4 SV=1	151668	0.73792	0.000368531
FTL	tr|A0A4X1W027|A0A4X1W027_PIG	Ferritin OS=Sus scrofa OX=9823 PE=3 SV=1	21025.6	0.751697	6.07374e-15
GC	tr|Q66RQ0|Q66RQ0_PIG	Gc-globulin (Fragment) OS=Sus scrofa OX=9823 PE=2 SV=1	25357.1	0.631236	8.57971e-08
GIT1	tr|A0A4X1TTK4|A0A4X1TTK4_PIG	Uncharacterized protein OS=Sus scrofa OX=9823 GN=GIT1 PE=4 SV=1	77867.5	0.81562	4.8016e-06
GLIPR2	tr|A0A5G2QA01|A0A5G2QA01_PIG	GLI pathogenesis related 2 OS=Sus scrofa OX=9823 GN=GLIPR2 PE=1 SV=1	17095.5	0.755017	0.00180123
GLT8D1	tr|A0A480VT79|A0A480VT79_PIG	Glycosyltransferase 8 domain-containing protein 1 OS=Sus scrofa OX=9823 PE=4 SV=1	20438.9	0.810932	0.0360561
GOLT1B	tr|A0A5G2R5G0|A0A5G2R5G0_PIG	Golgi transport 1B OS=Sus scrofa OX=9823 GN=GOLT1B PE=1 SV=1	14249.8	0.515796	2.17044e-06
GOSR2	tr|A0A481D687|A0A481D687_PIG	Golgi SNAP receptor complex member 2 isoform A (Fragment) OS=Sus scrofa OX=9823 PE=4 SV=1	22043.4	0.804545	7.75609e-06
GPR180	tr|A0A287AT35|A0A287AT35_PIG	Integral membrane protein GPR180 OS=Sus scrofa OX=9823 PE=4 SV=1	42306	0.774292	7.175e-06
GPT2	tr|F1RP04|F1RP04_PIG	Glutamic--pyruvic transaminase 2 OS=Sus scrofa OX=9823 GN=GPT2 PE=1 SV=2	55613.3	0.789751	3.57146e-05
GRIA4	tr|A0A287B6T4|A0A287B6T4_PIG	Glutamate receptor OS=Sus scrofa OX=9823 GN=GRIA4 PE=3 SV=1	96355	0.810665	1.30081e-05
GTF3A	tr|F1RTJ7|F1RTJ7_PIG	Uncharacterized protein OS=Sus scrofa OX=9823 GN=GTF3A PE=4 SV=4	42324.2	0.681443	2.07092e-07
H1-1	tr|A0A480EWB1|A0A480EWB1_PIG	Histone H1.1 OS=Sus scrofa OX=9823 PE=3 SV=1	21999	0.797109	3.56642e-07
HAAO	tr|A0A481BC34|A0A481BC34_PIG	3-hydroxyanthranilate 3,4-dioxygenase OS=Sus scrofa OX=9823 GN=HAAO PE=3 SV=1	33191.7	0.790606	0.00845593
HAUS3	tr|A0A5K1VJU7|A0A5K1VJU7_PIG	HAUS augmin like complex subunit 3 OS=Sus scrofa OX=9823 GN=HAUS3 PE=3 SV=1	54749.2	0.749178	1.00558e-05
HBB	tr|A7YB43|A7YB43_PIG	Beta-globin (Fragment) OS=Sus scrofa OX=9823 PE=2 SV=1	13992.3	0.670544	6.29774e-05
HBQ1	sp|P04246|HBT_PIG	Hemoglobin subunit theta OS=Sus scrofa OX=9823 PE=1 SV=1	16009.2	0.828054	0.00864287
HDAC4	tr|A0A5G2QFZ4|A0A5G2QFZ4_PIG	Histone deacetylase OS=Sus scrofa OX=9823 GN=HDAC4 PE=3 SV=1	84791.1	0.828225	1.19799e-07
HNF4A	tr|A0A4X1TR02|A0A4X1TR02_PIG	Uncharacterized protein OS=Sus scrofa OX=9823 GN=HNF4A PE=3 SV=1	47607	0.817758	0.000214427
HPS3	tr|A0A480RSS6|A0A480RSS6_PIG	Hermansky-Pudlak syndrome 3 protein isoform X1 OS=Sus scrofa OX=9823 PE=4 SV=1	73052.7	0.784746	8.09658e-05
IFT80	tr|A0A4X1VHN1|A0A4X1VHN1_PIG	Uncharacterized protein OS=Sus scrofa OX=9823 GN=IFT80 PE=4 SV=1	79707	0.817279	0.0274724
IGSF8	tr|A0A287ASW9|A0A287ASW9_PIG	Immunoglobulin superfamily member 8 OS=Sus scrofa OX=9823 GN=IGSF8 PE=1 SV=1	65909	0.776962	4.35944e-07
INPPL1	tr|A0A481BF97|A0A481BF97_PIG	Phosphatidylinositol-3,4,5-trisphosphate 5-phosphatase OS=Sus scrofa OX=9823 PE=3 SV=1	99858.1	0.635257	0.00198384
IRAK1	tr|A0A481B4N1|A0A481B4N1_PIG	Interleukin-1 receptor-associated kinase 1 isoform 1 OS=Sus scrofa OX=9823 PE=4 SV=1	73726.4	0.703388	2.09102e-06
ISY1	tr|A0A5G2RDZ4|A0A5G2RDZ4_PIG	Uncharacterized protein OS=Sus scrofa OX=9823 GN=LOC102162880 PE=3 SV=1	28377.8	0.742095	0.00136187
ITIH3	tr|A0A480KGP4|A0A480KGP4_PIG	Inter-alpha-trypsin inhibitor heavy chain H3 preproprotein (Fragment) OS=Sus scrofa OX=9823 PE=3 SV=1	94972.3	0.811116	9.41558e-07
ITIH4	tr|A0A5G2QU18|A0A5G2QU18_PIG	Inter-alpha-trypsin inhibitor heavy chain H4 OS=Sus scrofa OX=9823 GN=ITIH4 PE=1 SV=1	71898.1	0.826835	0.00415534
ITPKA	tr|A0A481DAI6|A0A481DAI6_PIG	Kinase (Fragment) OS=Sus scrofa OX=9823 PE=3 SV=1	44087.3	0.566468	9.56665e-05
JAK1	tr|O62756|O62756_PIG	Tyrosine-protein kinase (Fragment) OS=Sus scrofa OX=9823 GN=Jak1 PE=2 SV=1	116395	0.805876	0.00466485
KDM4A	tr|A0A480J6I6|A0A480J6I6_PIG	Lysine-specific demethylase 4A isoform X1 OS=Sus scrofa OX=9823 PE=4 SV=1	93103.2	0.464065	2.71892e-05
KRT1	tr|A0A4X1WD26|A0A4X1WD26_PIG	Cytokeratin-1 OS=Sus scrofa OX=9823 PE=3 SV=1	63109	0.809117	0.000265119
KRT2	tr|A0A287BHY5|A0A287BHY5_PIG	IF rod domain-containing protein OS=Sus scrofa OX=9823 PE=3 SV=1	66289.1	0.773215	1.79609e-07
KRT75	tr|A0A4X1WBS4|A0A4X1WBS4_PIG	IF rod domain-containing protein OS=Sus scrofa OX=9823 GN=LOC100525745 PE=4 SV=1	47490.8	0.719941	0.000122735
KRT77	tr|A0A4X1WBN6|A0A4X1WBN6_PIG	IF rod domain-containing protein OS=Sus scrofa OX=9823 PE=3 SV=1	63510.2	0.661175	0.000239525
LDB1	tr|Q05KH5|Q05KH5_PIG	CLIM2 OS=Sus scrofa OX=9823 PE=2 SV=1	43019.7	0.820061	1.10625e-08
LENG8	tr|A0A480S4N7|A0A480S4N7_PIG	PCI domain-containing protein OS=Sus scrofa OX=9823 GN=LENG8 PE=4 SV=1	88263.1	0.806162	0.000421954
LGALS3BP	tr|A0A287A604|A0A287A604_PIG	Galectin-3-binding protein OS=Sus scrofa OX=9823 GN=LGALS3BP PE=4 SV=2	56957.1	0.739001	1.26415e-08
LIPT1	tr|A0A480KFN1|A0A480KFN1_PIG	BPL/LPL catalytic domain-containing protein OS=Sus scrofa OX=9823 GN=LIPT1 PE=3 SV=1	42916.2	0.827807	1.20453e-05
LOC100519082	tr|A0A5G2QWL4|A0A5G2QWL4_PIG	Interferon-induced transmembrane protein 1 OS=Sus scrofa OX=9823 GN=LOC100519082 PE=1 SV=1	13788.1	0.823925	0.000197553
LOC100621407	tr|A0A4X1WB56|A0A4X1WB56_PIG	Uncharacterized protein OS=Sus scrofa OX=9823 GN=LOC100621407 PE=3 SV=1	57458.9	0.803857	0.00580398
LRRC14	tr|A0A480NHK0|A0A480NHK0_PIG	Leucine-rich repeat-containing protein 14 OS=Sus scrofa OX=9823 PE=3 SV=1	46076.9	0.651448	1.50621e-06
LRRC42	tr|A0A4X1WAW1|A0A4X1WAW1_PIG	Leucine-rich repeat-containing protein 42 OS=Sus scrofa OX=9823 GN=LRRC42 PE=3 SV=1	49140.8	0.822022	2.72146e-08
MAPKAP1	tr|I3L5P1|I3L5P1_PIG	MAPK associated protein 1 OS=Sus scrofa OX=9823 GN=MAPKAP1 PE=3 SV=3	36521.5	0.76268	0.00018451
MCRIP1	tr|A0A4X1UBE7|A0A4X1UBE7_PIG	Uncharacterized protein OS=Sus scrofa OX=9823 GN=MCRIP1 PE=3 SV=1	10999.6	0.816383	0.00720675
MEAF6	tr|A0A480W7D0|A0A480W7D0_PIG	Chromatin modification-related protein MEAF6 OS=Sus scrofa OX=9823 PE=3 SV=1	20474.2	0.829878	9.08208e-08
MMS19	tr|A0A480IP54|A0A480IP54_PIG	MMS19 nucleotide excision repair protein OS=Sus scrofa OX=9823 PE=3 SV=1	84362.5	0.768724	7.97101e-06
MNS1	tr|A0A4X1TJP6|A0A4X1TJP6_PIG	Meiosis-specific nuclear structural protein 1 OS=Sus scrofa OX=9823 GN=MNS1 PE=3 SV=3	60037.3	0.821765	3.60174e-07
MRPL21	tr|F1RY70|F1RY70_PIG	39S ribosomal protein L21, mitochondrial isoform d OS=Sus scrofa OX=9823 PE=1 SV=1	23317.5	0.819241	0.0307751
MRPS15	tr|A0A480QDJ5|A0A480QDJ5_PIG	28S ribosomal protein S15, mitochondrial OS=Sus scrofa OX=9823 GN=MRPS15 PE=3 SV=1	27492	0.7956	1.83072e-06
MT2A	sp|P79379|MT2_PIG	Metallothionein-2A OS=Sus scrofa OX=9823 GN=MT2A PE=3 SV=1	7087.59	0.479366	3.42057e-09
NCOR1	tr|A0A480SA47|A0A480SA47_PIG	Nuclear receptor corepressor 1 isoform X8 OS=Sus scrofa OX=9823 PE=3 SV=1	262324	0.829363	1.53286e-05
ND4	tr|A0A077EVQ4|A0A077EVQ4_PIG	NADH-ubiquinone oxidoreductase chain 4 OS=Sus scrofa domesticus OX=9825 GN=ND4 PE=3 SV=1	51875.5	0.74743	0.000555417
NEFH	tr|F1RFH3|F1RFH3_PIG	Neurofilament heavy polypeptide OS=Sus scrofa OX=9823 GN=NEFH PE=1 SV=2	93634.3	0.715333	0.000817981
NEXN	tr|A0A4X1URK3|A0A4X1URK3_PIG	Ig-like domain-containing protein OS=Sus scrofa OX=9823 GN=NEXN PE=4 SV=1	68220.2	0.610988	7.11711e-08
NFYB	tr|F1SG36|F1SG36_PIG	CAAT box DNA-binding protein subunit B OS=Sus scrofa OX=9823 GN=NFYB PE=3 SV=2	22707.9	0.80464	0.000700064
NFYC	tr|A0A4X1W6A0|A0A4X1W6A0_PIG	Histone domain-containing protein OS=Sus scrofa OX=9823 GN=NFYC PE=4 SV=1	34981.9	0.813882	0.00134649
NSUN5	tr|A0A480PF52|A0A480PF52_PIG	Putative 28S rRNA (Cytosine-C(5))-methyltransferase isoform 1 OS=Sus scrofa OX=9823 PE=3 SV=1	27363	0.827004	0.0274155
NUFIP1	tr|F1RJZ3|F1RJZ3_PIG	Nuclear FMR1 interacting protein 1 OS=Sus scrofa OX=9823 GN=NUFIP1 PE=4 SV=2	52231.1	0.785801	4.67994e-05
ORC2	tr|A0A287A6C5|A0A287A6C5_PIG	Origin recognition complex subunit 2 OS=Sus scrofa OX=9823 GN=ORC2 PE=1 SV=1	60592.9	0.796636	1.35491e-05
ORF	tr|Q29363|Q29363_PIG	Orf protein (Fragment) OS=Sus scrofa OX=9823 GN=orf PE=2 SV=1	4807.42	0.767649	0.0022435
PAN2	tr|A0A287BMV3|A0A287BMV3_PIG	PAN2-PAN3 deadenylation complex catalytic subunit PAN2 OS=Sus scrofa OX=9823 GN=PAN2 PE=3 SV=1	128822	0.783315	0.00439001
PCDHGC3	tr|A0A4X1SM71|A0A4X1SM71_PIG	Uncharacterized protein OS=Sus scrofa OX=9823 PE=4 SV=1	101060	0.746368	5.70389e-08
PDCD2	tr|A0A4X1VY99|A0A4X1VY99_PIG	MYND-type domain-containing protein OS=Sus scrofa OX=9823 PE=4 SV=1	33883.3	0.772341	4.96126e-08
PLG	tr|A0A4X1VW72|A0A4X1VW72_PIG	Plasminogen OS=Sus scrofa OX=9823 GN=PLG PE=4 SV=1	84726	0.568248	1.52845e-13
PLPP3	tr|A0A4X1W5J0|A0A4X1W5J0_PIG	Phospholipid phosphatase 3 OS=Sus scrofa OX=9823 GN=PLPP3 PE=1 SV=3	28994.8	0.767948	3.58149e-08
PPP1R14B	tr|A0A4X1VAY9|A0A4X1VAY9_PIG	Protein phosphatase 1 regulatory subunit 14B OS=Sus scrofa OX=9823 GN=PPP1R14B PE=1 SV=1	14636.5	0.806994	0.000230963
PPP1R37	tr|A0A480ZM45|A0A480ZM45_PIG	Protein phosphatase 1 regulatory subunit 37 isoform X1 OS=Sus scrofa OX=9823 PE=4 SV=1	57537.3	0.685512	0.000411641
PPP3CB	tr|F1SU57|F1SU57_PIG	Serine/threonine-protein phosphatase OS=Sus scrofa OX=9823 GN=PPP3CB PE=1 SV=4	58585.2	0.825051	0.000957386
PRDM2	tr|A0A287AGK1|A0A287AGK1_PIG	PR/SET domain 2 OS=Sus scrofa OX=9823 GN=PRDM2 PE=4 SV=2	161342	0.817425	0.000129575
PRKCZ	tr|A0A4X1W8V8|A0A4X1W8V8_PIG	Uncharacterized protein OS=Sus scrofa OX=9823 GN=PRKCZ PE=3 SV=1	46705.3	0.804436	0.00272218
PRKG2	tr|A0A4X1T0Z3|A0A4X1T0Z3_PIG	cGMP-dependent protein kinase OS=Sus scrofa OX=9823 GN=PRKG2 PE=3 SV=1	83474.1	0.827967	8.83518e-06
PRX	tr|A0A480JD10|A0A480JD10_PIG	Periaxin isoform X1 OS=Sus scrofa OX=9823 PE=4 SV=1	136215	0.781065	1.58259e-05
PTDSS1	tr|A0A4X1TWW8|A0A4X1TWW8_PIG	L-serine-phosphatidylethanolamine phosphatidyltransferase OS=Sus scrofa OX=9823 GN=PTDSS1 PE=3 SV=1	53298	0.779132	1.44791e-06
PTPMT1	tr|A0A4X1VSA3|A0A4X1VSA3_PIG	Uncharacterized protein OS=Sus scrofa OX=9823 GN=PTPMT1 PE=4 SV=1	16071.5	0.78731	6.44167e-06
PTPN14	tr|F1S2Y4|F1S2Y4_PIG	Tyrosine-protein phosphatase non-receptor type OS=Sus scrofa OX=9823 GN=PTPN14 PE=3 SV=4	135023	0.79235	0.00036544
PZP	tr|I3LQ17|I3LQ17_PIG	Uncharacterized protein OS=Sus scrofa OX=9823 GN=PZP PE=1 SV=3	151936	0.569073	2.71478e-10
RAB43	tr|A0A286ZPT3|A0A286ZPT3_PIG	Uncharacterized protein OS=Sus scrofa OX=9823 GN=RAB43 PE=4 SV=1	23305.7	0.827533	0.0216146
RABGAP1L	tr|F1S725|F1S725_PIG	Uncharacterized protein OS=Sus scrofa OX=9823 GN=RABGAP1L PE=4 SV=3	87790.6	0.798864	0.000124123
RB1CC1	tr|A0A480TX77|A0A480TX77_PIG	RB1-inducible coiled-coil protein 1 isoform X10 OS=Sus scrofa OX=9823 PE=4 SV=1	131877	0.801206	2.21561e-09
RBBP8NL	tr|I3L9W0|I3L9W0_PIG	RBBP8 N-terminal like OS=Sus scrofa OX=9823 GN=RBBP8NL PE=4 SV=2	65824.2	0.782611	0.00333854
RELN	tr|A0A5G2QTE4|A0A5G2QTE4_PIG	Reelin OS=Sus scrofa OX=9823 GN=RELN PE=3 SV=1	394735	0.761325	3.12153e-05
RMND1	tr|A0A287AVV0|A0A287AVV0_PIG	Required for meiotic nuclear division 1 homolog OS=Sus scrofa OX=9823 GN=RMND1 PE=1 SV=1	50887.3	0.8236	0.0108454
RNF138	tr|A0A287B8L4|A0A287B8L4_PIG	RING-type E3 ubiquitin transferase OS=Sus scrofa OX=9823 GN=RNF138 PE=4 SV=1	27006.7	0.784773	2.91927e-07
RNF41	tr|A0A287AHY1|A0A287AHY1_PIG	E3 ubiquitin-protein ligase NRDP1 OS=Sus scrofa OX=9823 GN=RNF41 PE=1 SV=1	23568.5	0.763881	2.53848e-07
SASS6	tr|I3L5C1|I3L5C1_PIG	Spindle assembly abnormal protein 6 homolog OS=Sus scrofa OX=9823 GN=SASS6 PE=4 SV=3	69956.8	0.785718	8.07812e-05
SAV1	tr|A0A4X1SFS9|A0A4X1SFS9_PIG	Uncharacterized protein OS=Sus scrofa OX=9823 GN=SAV1 PE=4 SV=1	44261	0.710853	8.0827e-05
SCA7	tr|B5G568|B5G568_PIG	Spinocerebellar ataxia type 7 (Fragment) OS=Sus scrofa OX=9823 GN=SCA7 PE=4 SV=1	3280.72	0.791375	6.04505e-08
SCO1	tr|A0A480X5K9|A0A480X5K9_PIG	Protein SCO1 homolog, mitochondrial OS=Sus scrofa OX=9823 PE=3 SV=1	21765.1	0.782653	0.00420233
SDHD	tr|A0A4X1TAY2|A0A4X1TAY2_PIG	Succinate dehydrogenase [ubiquinone] cytochrome b small subunit OS=Sus scrofa OX=9823 PE=3 SV=1	16352.5	0.49658	0.000215736
SELENOS	sp|F1SR90|SELS_PIG	Selenoprotein S OS=Sus scrofa OX=9823 GN=SELENOS PE=2 SV=2	21420	0.788695	4.54875e-05
SELENOT	tr|A0A287BFK4|A0A287BFK4_PIG	Selenoprotein T OS=Sus scrofa OX=9823 GN=SELENOT PE=3 SV=1	15930	0.769869	2.91996e-05
SERPIN	tr|B0LXF7|B0LXF7_PIG	Aprotinin (Fragment) OS=Sus scrofa OX=9823 PE=4 SV=1	7019.12	0.817149	1.20317e-08
SH3GL3	tr|A0A4X1UM76|A0A4X1UM76_PIG	Uncharacterized protein OS=Sus scrofa OX=9823 PE=4 SV=1	57912.8	0.803885	0.000141711
SIPA1L1	tr|H9LCD0|H9LCD0_PIG	Signal-induced proliferation-associated 1 like protein 1 (Fragment) OS=Sus scrofa OX=9823 GN=SIPA1L1 PE=4 SV=1	28695.5	0.718809	1.02089e-06
SIRT1	tr|B3FK65|B3FK65_PIG	Sirtuin 1 OS=Sus scrofa OX=9823 PE=3 SV=1	82053.2	0.789108	0.000334906
SLA-DQA	tr|G8C429|G8C429_PIG	MHC class II antigen (Fragment) OS=Sus scrofa OX=9823 GN=SLA-DQA PE=4 SV=1	7410.63	0.758501	2.21584e-08
SLC25A39	tr|A0A480VKB4|A0A480VKB4_PIG	Solute carrier family 25 member 39 isoform X1-like OS=Sus scrofa OX=9823 PE=3 SV=1	15736.7	0.690925	0.000653661
SLC26A3	tr|A0A4X1V0U0|A0A4X1V0U0_PIG	Chloride anion exchanger OS=Sus scrofa OX=9823 GN=SLC26A3 PE=3 SV=1	88413.1	0.580838	1.98161e-06
SLC6A16	tr|A0A4X1VYI6|A0A4X1VYI6_PIG	Transporter OS=Sus scrofa OX=9823 PE=3 SV=1	74955.4	0.786617	0.00420835
SLX4	tr|F1RK43|F1RK43_PIG	SLX4 structure-specific endonuclease subunit OS=Sus scrofa OX=9823 GN=SLX4 PE=3 SV=3	191958	0.694127	0.000684614
SMUG1	tr|A0A5G2QFZ8|A0A5G2QFZ8_PIG	Single-strand-selective monofunctional uracil-DNA glycosylase 1 OS=Sus scrofa OX=9823 GN=SMUG1 PE=1 SV=1	17810.1	0.773845	0.00505517
SPECC1	tr|A0A4X1T6R6|A0A4X1T6R6_PIG	Uncharacterized protein OS=Sus scrofa OX=9823 PE=4 SV=1	64758.6	0.824095	9.58881e-11
SPPL2B	tr|A0A287B5E9|A0A287B5E9_PIG	Signal peptide peptidase like 2B OS=Sus scrofa OX=9823 GN=SPPL2B PE=4 SV=2	35722.3	0.817021	4.86664e-11
SPRN	tr|A0A4X1V4K8|A0A4X1V4K8_PIG	Shadow of prion protein OS=Sus scrofa OX=9823 PE=3 SV=1	15013.1	0.596827	0.000334488
STK11	tr|F1S6Q9|F1S6Q9_PIG	Non-specific serine/threonine protein kinase OS=Sus scrofa OX=9823 GN=STK11 PE=3 SV=4	49850.1	0.80422	0.000225997
STRADA	tr|A0A287B232|A0A287B232_PIG	Protein kinase domain-containing protein OS=Sus scrofa OX=9823 GN=STRADA PE=4 SV=1	30293.4	0.578516	8.18454e-11
SYT17	tr|A0A4X1VGT6|A0A4X1VGT6_PIG	Synaptotagmin XVII OS=Sus scrofa OX=9823 GN=SYT17 PE=3 SV=1	19988.3	0.732842	7.40461e-06
TBC1D9B	tr|A0A480TIC4|A0A480TIC4_PIG	TBC1 domain family member 9B isoform b OS=Sus scrofa OX=9823 PE=4 SV=1	107574	0.772638	0.0043204
TBCC	tr|A0A4X1SFI3|A0A4X1SFI3_PIG	Tubulin-folding cofactor C OS=Sus scrofa OX=9823 GN=TBCC PE=3 SV=1	39443.9	0.760325	0.000298945
TCEAL4	tr|A0A287A057|A0A287A057_PIG	Uncharacterized protein OS=Sus scrofa OX=9823 GN=TCEAL4 PE=4 SV=1	25551.7	0.685857	1.28338e-05
TF	tr|A0A4X1TVR3|A0A4X1TVR3_PIG	Beta-1 metal-binding globulin OS=Sus scrofa OX=9823 PE=3 SV=1	74777.5	0.718284	9.76545e-13
THBS2	tr|A0A5G2QJE2|A0A5G2QJE2_PIG	Thrombospondin 2 OS=Sus scrofa OX=9823 GN=THBS2 PE=3 SV=1	134874	0.799435	0.0124519
THNSL1	tr|A0A287A821|A0A287A821_PIG	Thr_synth_N domain-containing protein OS=Sus scrofa OX=9823 GN=THNSL1 PE=3 SV=1	84170.7	0.798082	0.000113117
TMEM184C	tr|A0A287ANR7|A0A287ANR7_PIG	Transmembrane protein 184C OS=Sus scrofa OX=9823 GN=TMEM184C PE=4 SV=2	47345	0.745513	1.25355e-06
TMEM259	tr|A0A4X1VUK2|A0A4X1VUK2_PIG	Uncharacterized protein OS=Sus scrofa OX=9823 PE=4 SV=1	46301.5	0.827228	3.56589e-05
TRAF3IP2	tr|A0A286ZLT6|A0A286ZLT6_PIG	TRAF3 interacting protein 2 OS=Sus scrofa OX=9823 GN=TRAF3IP2 PE=4 SV=2	62466.8	0.751089	0.00114396
TSKU	tr|A0A4X1UJG2|A0A4X1UJG2_PIG	Uncharacterized protein OS=Sus scrofa OX=9823 PE=4 SV=1	34010.2	0.690245	2.44581e-05
TTC19	tr|A0A4X1V7Z2|A0A4X1V7Z2_PIG	Uncharacterized protein OS=Sus scrofa OX=9823 PE=3 SV=1	42790.5	0.746758	0.00876302
TTC9C	tr|A0A4X1VLK2|A0A4X1VLK2_PIG	Tetratricopeptide repeat domain 9C OS=Sus scrofa OX=9823 GN=TTC9C PE=4 SV=2	20033.1	0.73108	0.00231383
TTN	tr|A0A480SN35|A0A480SN35_PIG	Titin isoform X6 OS=Sus scrofa OX=9823 PE=3 SV=1	3.14144e+06	0.774981	0.0143874
TWISTNB	tr|A0A480DRU8|A0A480DRU8_PIG	Uncharacterized protein OS=Sus scrofa OX=9823 GN=TWISTNB PE=3 SV=1	37532.1	0.805833	6.29907e-06
TYK2	tr|A0A480XYW7|A0A480XYW7_PIG	Non-specific protein-tyrosine kinase OS=Sus scrofa OX=9823 PE=4 SV=1	78796.8	0.776343	0.0121887
UBAC2	tr|F1RP28|F1RP28_PIG	UBA domain-containing protein OS=Sus scrofa OX=9823 GN=UBAC2 PE=4 SV=3	37658.5	0.770151	6.81304e-07
UNC5B	tr|A0A4X1TCM0|A0A4X1TCM0_PIG	Netrin receptor UNC5 OS=Sus scrofa OX=9823 GN=UNC5B PE=3 SV=1	104354	0.819193	0.000543335
UPF3A	tr|A0A5G2QSU6|A0A5G2QSU6_PIG	UPF3A regulator of nonsense mediated mRNA decay OS=Sus scrofa OX=9823 GN=UPF3A PE=3 SV=1	52994	0.831454	0.000460611
VAMP8	tr|A0A4X1W681|A0A4X1W681_PIG	V-SNARE coiled-coil homology domain-containing protein OS=Sus scrofa OX=9823 GN=VAMP8 PE=4 SV=1	11474.1	0.813884	0.0310443
VCL	tr|A0A5G2QNQ2|A0A5G2QNQ2_PIG	Uncharacterized protein OS=Sus scrofa OX=9823 PE=3 SV=1	158070	0.803165	0.0126581
VTN	tr|A0A5G2RAP3|A0A5G2RAP3_PIG	Vitronectin OS=Sus scrofa OX=9823 GN=VTN PE=4 SV=1	18744.3	0.819459	0.000279219
ZBTB11	tr|A0A4X1SG17|A0A4X1SG17_PIG	Uncharacterized protein OS=Sus scrofa OX=9823 PE=4 SV=1	121052	0.826589	3.07461e-06
ZC3H12B	tr|A0A4X1VPU5|A0A4X1VPU5_PIG	Zinc finger CCCH-type containing 12B OS=Sus scrofa OX=9823 GN=ZC3H12B PE=3 SV=3	94947.2	0.795538	0.0083973
ZHX1	tr|A0A4X1T3V2|A0A4X1T3V2_PIG	Uncharacterized protein OS=Sus scrofa OX=9823 PE=4 SV=1	31949.4	0.795267	0.0109096
ZNF106	tr|A0A480K5X4|A0A480K5X4_PIG	Zinc finger protein 106 isoform X1 OS=Sus scrofa OX=9823 PE=4 SV=1	140091	0.831714	7.80956e-05
ZNRD2	tr|A0A4X1USL4|A0A4X1USL4_PIG	Sjoegren syndrome/scleroderma autoantigen 1 isoform 1 OS=Sus scrofa OX=9823 GN=ZNRD2 PE=1 SV=1	21904.9	0.685941	1.00516e-07

## Sheet: Table S4
Table S4. Functional annotation for differentially expressed proteins
ID	Description	P value	Q value	Gene ID
GO:0033344	cholesterol efflux	0.000233574	0.165938	SIRT1/TSKU/APOA4/APOA1
GO:0006958	complement activation, classical pathway	0.00029185	0.165938	C8A/C3/C6/C4A
GO:0002455	humoral immune response mediated by circulating immunoglobulin	0.000528724	0.165938	C8A/C3/C6/C4A
GO:0016064	immunoglobulin mediated immune response	0.000561788	0.165938	C8A/C3/C6/C4A/LIG4
GO:0019724	B cell mediated immunity	0.000633096	0.165938	C8A/C3/C6/C4A/LIG4
GO:0015850	organic hydroxy compound transport	0.00149954	0.292214	SIRT1/SYT17/TSKU/APOA4/APOA1/RBP4
GO:0006956	complement activation	0.00156082	0.292214	C8A/C3/C6/C4A
GO:0015918	sterol transport	0.0028479	0.394527	SIRT1/TSKU/APOA4/APOA1
GO:0030301	cholesterol transport	0.0028479	0.394527	SIRT1/TSKU/APOA4/APOA1
GO:0090207	regulation of triglyceride metabolic process	0.00304938	0.394527	C3/SIRT1/APOA4
GO:0032371	regulation of sterol transport	0.00361254	0.394527	SIRT1/APOA4/APOA1
GO:0032374	regulation of cholesterol transport	0.00361254	0.394527	SIRT1/APOA4/APOA1
GO:0055088	lipid homeostasis	0.00429415	0.432892	SIRT1/TSKU/HNF4A/APOA4
GO:0006754	ATP biosynthetic process	0.00491905	0.460467	SIRT1/ATP6/ATP5ME
GO:0042632	cholesterol homeostasis	0.0056658	0.464074	SIRT1/TSKU/APOA4
GO:0055092	sterol homeostasis	0.0056658	0.464074	SIRT1/TSKU/APOA4
GO:0008202	steroid metabolic process	0.0064683	0.49864	SIRT1/TSKU/APOA4/APOA1/AFP/FDFT1
GO:0046034	ATP metabolic process	0.00787996	0.534206	SDHD/ND4/SIRT1/ATP6/ATP5ME/ND3
GO:0002449	lymphocyte mediated immunity	0.00812698	0.534206	C8A/C3/C6/C4A/LIG4
GO:0016125	sterol metabolic process	0.00852248	0.534206	TSKU/APOA4/APOA1/FDFT1
GO:1990830	cellular response to leukemia inhibitory factor	0.0093093	0.534206	NFYB/SIRT1/RNF138
GO:1990823	response to leukemia inhibitory factor	0.0103901	0.534206	NFYB/SIRT1/RNF138
GO:0002460	adaptive immune response based on somatic recombination of immune receptors built from immunoglobulin superfamily domains	0.0107595	0.534206	C8A/C3/C6/C4A/LIG4
GO:0009206	purine ribonucleoside triphosphate biosynthetic process	0.0115407	0.534206	SIRT1/ATP6/ATP5ME
GO:1902600	proton transmembrane transport	0.0115407	0.534206	ND4/ATP6/ATP5ME
GO:0006957	complement activation, alternative pathway	0.0126959	0.534206	C8A/C3
GO:0010874	regulation of cholesterol efflux	0.0126959	0.534206	SIRT1/APOA1
GO:0055090	acylglycerol homeostasis	0.0126959	0.534206	SIRT1/APOA4
GO:0070328	triglyceride homeostasis	0.0126959	0.534206	SIRT1/APOA4
GO:0009145	purine nucleoside triphosphate biosynthetic process	0.0127619	0.534206	SIRT1/ATP6/ATP5ME
GO:0042180	cellular ketone metabolic process	0.0130441	0.534206	SIRT1/APOA4/AFP/COQ9
GO:1905952	regulation of lipid localization	0.0130441	0.534206	C3/SIRT1/APOA4/APOA1
GO:1902017	regulation of cilium assembly	0.0153396	0.544661	MNS1/DCDC2
GO:0009201	ribonucleoside triphosphate biosynthetic process	0.0154185	0.544661	SIRT1/ATP6/ATP5ME
GO:0006119	oxidative phosphorylation	0.0167736	0.544661	SDHD/ND4/ATP6/ND3
GO:0019433	triglyceride catabolic process	0.018197	0.544661	SIRT1/APOA4
GO:0032007	negative regulation of TOR signaling	0.018197	0.544661	AKT1S1/SIRT1
GO:0032373	positive regulation of sterol transport	0.018197	0.544661	SIRT1/APOA1
GO:0032376	positive regulation of cholesterol transport	0.018197	0.544661	SIRT1/APOA1
GO:0042744	hydrogen peroxide catabolic process	0.018197	0.544661	HBQ1/HBB
GO:1902117	positive regulation of organelle assembly	0.018197	0.544661	MNS1/PAN2
GO:0009142	nucleoside triphosphate biosynthetic process	0.0183638	0.544661	SIRT1/ATP6/ATP5ME
GO:0009205	purine ribonucleoside triphosphate metabolic process	0.0183638	0.544661	SIRT1/ATP6/ATP5ME
GO:0019646	aerobic electron transport chain	0.0183638	0.544661	SDHD/ND4/ND3
GO:0120031	plasma membrane bounded cell projection assembly	0.0205457	0.544661	DYNC2LI1/MNS1/DCDC2/VCL/RILPL1/BRK1
GO:1901214	regulation of neuron death	0.0211104	0.544661	SIRT1/UNC5B/LIG4/RILPL1
GO:0006826	iron ion transport	0.0212601	0.544661	TF/TF
GO:0042304	regulation of fatty acid biosynthetic process	0.0212601	0.544661	SIRT1/APOA4
GO:0097720	calcineurin-mediated signaling	0.0212601	0.544661	PPP3CB/LMCD1
GO:0009144	purine nucleoside triphosphate metabolic process	0.0216001	0.544661	SIRT1/ATP6/ATP5ME
GO:0042775	mitochondrial ATP synthesis coupled electron transport	0.0216001	0.544661	SDHD/ND4/ND3
GO:0030031	cell projection assembly	0.0228574	0.544661	DYNC2LI1/MNS1/DCDC2/VCL/RILPL1/BRK1
GO:0002443	leukocyte mediated immunity	0.0229633	0.544661	C8A/C3/C6/C4A/LIG4
GO:0006641	triglyceride metabolic process	0.0233277	0.544661	C3/SIRT1/APOA4
GO:0009199	ribonucleoside triphosphate metabolic process	0.0233277	0.544661	SIRT1/ATP6/ATP5ME
GO:1905954	positive regulation of lipid localization	0.0233277	0.544661	C3/SIRT1/APOA1
GO:0010883	regulation of lipid storage	0.0245207	0.544661	C3/SIRT1
GO:0015985	energy coupled proton transport, down electrochemical gradient	0.0245207	0.544661	ATP6/ATP5ME
GO:0015986	ATP synthesis coupled proton transport	0.0245207	0.544661	ATP6/ATP5ME
GO:0022602	ovulation cycle process	0.027971	0.578998	SIRT1/AFP
GO:0030032	lamellipodium assembly	0.027971	0.578998	VCL/BRK1
GO:0002250	adaptive immune response	0.028919	0.578998	C8A/C3/C6/SIRT1/C4A/LIG4
GO:0042773	ATP synthesis coupled electron transport	0.0289483	0.578998	SDHD/ND4/ND3
GO:0010876	lipid localization	0.0298637	0.578998	C3/SIRT1/TSKU/APOA4/APOA1/RBP4
GO:1902115	regulation of organelle assembly	0.0309673	0.578998	MNS1/PAN2/DCDC2
GO:0006120	mitochondrial electron transport, NADH to ubiquinone	0.0316035	0.578998	ND4/ND3
GO:0019217	regulation of fatty acid metabolic process	0.0316035	0.578998	SIRT1/APOA4
GO:0046626	regulation of insulin receptor signaling pathway	0.0316035	0.578998	SIRT1/GRB10
GO:1900076	regulation of cellular response to insulin stimulus	0.0316035	0.578998	SIRT1/GRB10
GO:1990748	cellular detoxification	0.0316035	0.578998	HBQ1/HBB
GO:0042743	hydrogen peroxide metabolic process	0.0354107	0.578998	HBQ1/HBB
GO:0046461	neutral lipid catabolic process	0.0354107	0.578998	SIRT1/APOA4
GO:0046464	acylglycerol catabolic process	0.0354107	0.578998	SIRT1/APOA4
GO:0046839	phospholipid dephosphorylation	0.0354107	0.578998	PLPP3/INPPL1
GO:0050994	regulation of lipid catabolic process	0.0354107	0.578998	SIRT1/APOA4
GO:0090630	activation of GTPase activity	0.0354107	0.578998	SIPA1L1/TBC1D9B
GO:0009141	nucleoside triphosphate metabolic process	0.0374566	0.578998	SIRT1/ATP6/ATP5ME
GO:0032368	regulation of lipid transport	0.0374566	0.578998	SIRT1/APOA4/APOA1
GO:0060491	regulation of cell projection assembly	0.0374566	0.578998	MNS1/DCDC2/BRK1
GO:0120032	regulation of plasma membrane bounded cell projection assembly	0.0374566	0.578998	MNS1/DCDC2/BRK1
GO:0009060	aerobic respiration	0.0379674	0.578998	SDHD/ND4/ATP6/ND3
GO:0070997	neuron death	0.0379674	0.578998	SIRT1/UNC5B/LIG4/RILPL1
GO:0006959	humoral immune response	0.0390518	0.578998	C8A/C3/C6/TF/C4A
GO:0014068	positive regulation of phosphatidylinositol 3-kinase signaling	0.0393854	0.578998	SIRT1/UNC5B
GO:0032088	negative regulation of NF-kappaB transcription factor activity	0.0393854	0.578998	SIRT1/LRRC14
GO:0034314	Arp2/3 complex-mediated actin nucleation	0.0393854	0.578998	ARPC3/BRK1
GO:0006638	neutral lipid metabolic process	0.0397625	0.578998	C3/SIRT1/APOA4
GO:0006639	acylglycerol metabolic process	0.0397625	0.578998	C3/SIRT1/APOA4
GO:0008203	cholesterol metabolic process	0.0397625	0.578998	TSKU/APOA4/APOA1
GO:0022904	respiratory electron transport chain	0.0397625	0.578998	SDHD/ND4/ND3
GO:0030111	regulation of Wnt signaling pathway	0.0413538	0.594116	PLPP3/TSKU/DCDC2/GRB10
GO:1901215	negative regulation of neuron death	0.042139	0.594116	SIRT1/UNC5B/LIG4
GO:0016126	sterol biosynthetic process	0.0435208	0.594116	APOA4/FDFT1
GO:0042698	ovulation cycle	0.0435208	0.594116	SIRT1/AFP
GO:0097237	cellular response to toxic substance	0.0435208	0.594116	HBQ1/HBB
GO:0097581	lamellipodium organization	0.0435208	0.594116	VCL/BRK1
GO:1902652	secondary alcohol metabolic process	0.0445856	0.602378	TSKU/APOA4/APOA1
GO:0022900	electron transport chain	0.0471017	0.620357	SDHD/ND4/ND3
GO:0006289	nucleotide-excision repair	0.0478098	0.620357	SIRT1/LIG4
GO:0071479	cellular response to ionizing radiation	0.0478098	0.620357	SIRT1/LIG4
GO:0098754	detoxification	0.0478098	0.620357	HBQ1/HBB

## Sheet: Table S5
Table S5. Pathways enriched by differentially expressed proteins
ID	Description	P value	Q value	Gene ID
ssc04610	Complement and coagulation cascades	0.000127502	0.0241583	C8A/C3/C6/VTN/C4A/A2M/PLG
ssc04152	AMPK signaling pathway	0.00177609	0.168261	AKT1S1/STK11/SIRT1/CCNA2/HNF4A/STRADA/SCD
ssc04977	Vitamin digestion and absorption	0.00521297	0.2403	BTD/APOA4/APOA1
ssc05014	Amyotrophic lateral sclerosis	0.00576885	0.2403	SDHD/ND4/PPP3CB/RB1CC1/NEFH/C10H9orf72/DNAH8/ATP5F1E/ATP6/KLC3/DNAH3/ND3
ssc04978	Mineral absorption	0.00725466	0.2403	SLC26A3/FTL/TF/TF
ssc04130	SNARE interactions in vesicular transport	0.0113831	0.286403	VAMP8/GOSR2/STX11
ssc00190	Oxidative phosphorylation	0.0136041	0.286403	SDHD/ND4/ATP5F1E/ATP6/ATP5ME/ND3
ssc04714	Thermogenesis	0.0179687	0.309508	SDHD/ND4/AKT1S1/PRKG2/ATP5F1E/ATP6/ATP5ME/ND3
ssc04216	Ferroptosis	0.0218322	0.324199	FTL/TF/TF
ssc04150	mTOR signaling pathway	0.0222437	0.324199	AKT1S1/STK11/MAPKAP1/CASTOR2/STRADA/GRB10
ssc04975	Fat digestion and absorption	0.0246757	0.333957	PLPP3/APOA4/APOA1
ssc00220	Arginine biosynthesis	0.0325597	0.385576	GPT2/CPS1
ssc04211	Longevity regulating pathway	0.038344	0.387073	AKT1S1/STK11/SIRT1/RB1CC1
ssc04512	ECM-receptor interaction	0.038344	0.387073	THBS2/VTN/RELN/LAMB3
ssc03015	mRNA surveillance pathway	0.0410814	0.387073	UPF3A/CSTF2/DAZAP1/FIP1L1
ssc05150	Staphylococcus aureus infection	0.0410814	0.387073	C3/C4A/PLG/KRT19
ssc04666	Fc gamma R-mediated phagocytosis	0.0439274	0.387073	PLPP3/INPPL1/PRKCE/ARPC3
ssc05152	Tuberculosis	0.0481362	0.387073	C3/PPP3CB/NFYB/IRAK1/JAK1/NFYC
ssc00564	Glycerophospholipid metabolism	0.0499444	0.387073	DGKQ/PLPP3/ETNPPL/PTDSS1

## Sheet: Table S6
Table S6. Correlations between differential metabolites and differentially expressed proteins
Protein Metabolite	C8A	DCDC2	PLG	PLPP3	CCDC50	STRADA	TF	DNAJC12	C3	MEAF6	HDAC4	FHL3	LDB1	Ager	PTPMT1	ZNF106	PRKG2	CHURC1	TSKU	VTN	CBX6	RNF138	PDCD2	MRPS15	PRX	DYNLT1	LGALS3BP	ADAM12	SLC25A39	LRRC14	SYT17	SAV1	ITIH3		RBBP8NL	HPS3	SMUG1	UPF3A	FBXL6	BTD	ALB	SLA-DQA	SPECC1	SCA7	SPPL2B	APOA4	RB1CC1	CYP2J2	C4A
Lauramide	0.863351	0.855369	0.86468	0.860035	0.851283	0.843428	0.835585	0.815615	0.827076	0.871232	0.863335	0.852067	0.848061	0.886726	0.779026	0.777692	0.813924	0.773409	0.764142	0.79899	0.883369	0.868233	0.877117	0.852023	0.831089	0.81079	0.911803	0.787226	0.785393	0.824552	0.735121	0.733179	0.769145	0.737671	0.734571	0.75193	0.74175	0.679857	0.643695	0.597058	0.717141	0.715795	0.695466	0.685091	0.700955	0.741548	0.722953	0.745859	0.720414
(2,7-dimethyloctahydro-1h-cyclopenta[c]pyridin-4-yl)methanol	0.86095	0.852965	0.862238	0.857662	0.848924	0.841036	0.833201	0.813273	0.824759	0.868911	0.861041	0.849773	0.845791	0.884343	0.776967	0.775589	0.811786	0.771271	0.761986	0.796806	0.881152	0.86604	0.874867	0.849902	0.829024	0.808737	0.90961	0.785343	0.783456	0.822552	0.733291	0.731296	0.767165	0.735943	0.732843	0.750181	0.740058	0.678242	0.642184	0.595544	0.714693	0.713356	0.693064	0.68271	0.698605	0.739122	0.720578	0.743312	0.717906
(3z,6e)-n-hydroxy-2,4,4,7-tetramethyl-6,8-nonadien-3-imine	0.862719	0.854764	0.864078	0.859391	0.850653	0.842849	0.835024	0.81508	0.826485	0.870512	0.862617	0.851382	0.84737	0.886009	0.778369	0.777074	0.813227	0.772833	0.763608	0.798376	0.882528	0.867416	0.876321	0.851197	0.83028	0.810032	0.910856	0.7864	0.784616	0.823709	0.734409	0.732515	0.768453	0.736867	0.733777	0.751101	0.740905	0.679135	0.642996	0.596502	0.716986	0.715638	0.695339	0.684979	0.70077	0.741302	0.722722	0.7457	0.720301
Sl3675000	0.861576	0.853644	0.862953	0.858244	0.849522	0.841755	0.833948	0.814037	0.825399	0.869308	0.861421	0.850216	0.846203	0.884794	0.777284	0.776014	0.812087	0.771803	0.762612	0.7973	0.881239	0.866156	0.875066	0.849945	0.829057	0.808858	0.909477	0.785206	0.783453	0.822471	0.733329	0.731466	0.767356	0.735729	0.732647	0.749934	0.739738	0.678097	0.642005	0.595638	0.716263	0.714915	0.694652	0.684309	0.700042	0.740502	0.721947	0.744949	0.719599
To0127900	0.871392	0.863132	0.872432	0.868187	0.859278	0.85091	0.842882	0.822617	0.834639	0.88015	0.872217	0.860601	0.856652	0.895642	0.787133	0.785411	0.822499	0.78071	0.771011	0.806723	0.893495	0.878082	0.886787	0.86193	0.840782	0.819945	0.923021	0.796987	0.794672	0.834564	0.743667	0.741246	0.777568	0.747113	0.743915	0.761651	0.751602	0.688379	0.651909	0.603782	0.720214	0.718889	0.698219	0.687684	0.70429	0.74556	0.726786	0.74904	0.7231
3-amino-5,7-dimethyl-1-adamantanol	0.858248	0.850012	0.859122	0.855163	0.84635	0.83789	0.829926	0.809912	0.82198	0.867275	0.859481	0.847918	0.844077	0.882461	0.775684	0.773801	0.810589	0.768982	0.759257	0.7947	0.880965	0.865717	0.874161	0.849913	0.829074	0.808377	0.910458	0.786177	0.783666	0.82314	0.733297	0.730684	0.766468	0.737127	0.733942	0.751519	0.741734	0.679088	0.643182	0.595255	0.707551	0.706262	0.685829	0.675421	0.692073	0.73287	0.714375	0.735862	0.710185
(9z,12z)-n-hydroxy-9,12-octadecadienamide	0.870554	0.862045	0.871211	0.867531	0.858535	0.849622	0.841458	0.821076	0.83366	0.880316	0.872439	0.860527	0.856702	0.895611	0.787448	0.785255	0.822962	0.780082	0.769956	0.806315	0.89503	0.879461	0.887828	0.863587	0.842436	0.821178	0.925571	0.799284	0.796385	0.836703	0.745094	0.742096	0.778408	0.749637	0.746355	0.764347	0.754592	0.690479	0.65408	0.604668	0.714972	0.71369	0.692849	0.682245	0.699584	0.741192	0.722426	0.743569	0.717328
(3e,5e,7e)-6-ethyl-4-methyl-3,5,7-decatriene	0.8836	0.876092	0.885941	0.879747	0.871035	0.86442	0.856761	0.836675	0.84693	0.88906	0.880856	0.870112	0.865707	0.90539	0.794539	0.79439	0.82979	0.791233	0.78287	0.816786	0.897929	0.882878	0.89282	0.865611	0.844248	0.824607	0.924346	0.79781	0.797441	0.836324	0.746853	0.746356	0.783101	0.74663	0.743683	0.760749	0.749598	0.688699	0.651596	0.607289	0.745663	0.744178	0.723862	0.71345	0.727758	0.768332	0.749324	0.775573	0.75037
(2e,4e,6e)-5-ethyl-3-methyl-2,4,6-nonatriene	0.825251	0.817785	0.826765	0.821968	0.813663	0.806507	0.799102	0.7801	0.79069	0.832139	0.824561	0.813985	0.81008	0.847066	0.743965	0.742991	0.777208	0.7392	0.73062	0.763497	0.842861	0.828502	0.837204	0.812839	0.792845	0.773722	0.869375	0.750534	0.749155	0.78629	0.701316	0.699828	0.734192	0.703052	0.700144	0.716564	0.706652	0.648096	0.613507	0.569776	0.688391	0.687078	0.667768	0.657902	0.672588	0.711149	0.693381	0.715971	0.691857
Obscuraminol a	0.78816	0.778461	0.785793	0.786813	0.777926	0.765554	0.757055	0.737533	0.753383	0.804871	0.798111	0.784942	0.782404	0.817292	0.721254	0.715594	0.754814	0.707204	0.694649	0.732854	0.828927	0.813502	0.818511	0.801176	0.781838	0.759168	0.864685	0.747442	0.740264	0.780375	0.691222	0.684002	0.717077	0.703891	0.70024	0.718644	0.712025	0.646591	0.613917	0.558838	0.611951	0.611114	0.590765	0.580543	0.602064	0.642667	0.625611	0.636276	0.609984
(-)-lupinine	0.783288	0.7737	0.781012	0.781913	0.7731	0.760916	0.752498	0.733125	0.748762	0.799691	0.792963	0.779937	0.777391	0.812072	0.716579	0.711049	0.749895	0.702807	0.690417	0.728249	0.823319	0.808025	0.813069	0.795721	0.776508	0.754067	0.858647	0.742204	0.735188	0.774958	0.686517	0.679458	0.712324	0.698885	0.695275	0.71351	0.706875	0.642037	0.609557	0.555088	0.609085	0.608245	0.58806	0.577917	0.599155	0.63943	0.622482	0.6333	0.607237
[similar to: l-glutamic acid; 未mass: -0.0564 da]	0.781787	0.771972	0.779151	0.780585	0.771699	0.759008	0.75047	0.731003	0.747158	0.799128	0.792459	0.779164	0.776736	0.81131	0.716232	0.71026	0.749658	0.701578	0.688795	0.727205	0.824032	0.808603	0.813322	0.796575	0.777376	0.754556	0.86029	0.743712	0.73615	0.776287	0.687251	0.679651	0.712478	0.700649	0.696962	0.715422	0.709072	0.643449	0.611066	0.555427	0.603566	0.602768	0.582438	0.572239	0.594152	0.634712	0.617787	0.627542	0.601216
Taurine	0.814173	0.805292	0.813418	0.811988	0.803232	0.792906	0.784759	0.765202	0.779032	0.826943	0.819748	0.807505	0.804355	0.840588	0.740303	0.736553	0.774168	0.730001	0.718964	0.755413	0.845668	0.830493	0.837131	0.816593	0.796724	0.77526	0.87798	0.758527	0.753711	0.793086	0.704536	0.699649	0.733702	0.712742	0.709358	0.727163	0.719063	0.655685	0.621773	0.570778	0.652319	0.65127	0.631094	0.620889	0.639798	0.680068	0.662487	0.67834	0.652626
Hydroxychloroquine	0.815949	0.807243	0.81548	0.813625	0.804921	0.794991	0.786933	0.767438	0.780866	0.827984	0.820737	0.808698	0.805451	0.841796	0.74111	0.737708	0.774911	0.731501	0.720769	0.756784	0.845707	0.830628	0.837529	0.816499	0.796605	0.775426	0.877303	0.757872	0.753486	0.792598	0.704458	0.699997	0.734105	0.711851	0.708526	0.726163	0.717831	0.655032	0.621019	0.570917	0.657174	0.656091	0.636015	0.625848	0.644233	0.684305	0.666693	0.683403	0.65788
Sudan 7b	0.831407	0.822611	0.831041	0.828987	0.820146	0.810189	0.802021	0.782196	0.795711	0.843375	0.835976	0.823799	0.820456	0.857502	0.754837	0.751509	0.789227	0.745324	0.734515	0.771015	0.861031	0.845716	0.852845	0.831243	0.810979	0.789527	0.892921	0.771337	0.767039	0.806756	0.717179	0.712803	0.74755	0.724391	0.721029	0.738922	0.730348	0.666637	0.631969	0.581306	0.67095	0.669835	0.649434	0.639097	0.657612	0.698334	0.68039	0.697735	0.671823
4-nitro-6-oxohepta-2,4-dienedioic acid	0.884412	0.879146	0.890092	0.87899	0.871105	0.869332	0.862914	0.844013	0.849256	0.881009	0.872378	0.864311	0.858859	0.898959	0.785881	0.789871	0.819578	0.790886	0.786332	0.814322	0.877794	0.864226	0.877068	0.84464	0.823469	0.807666	0.895101	0.771725	0.776485	0.811339	0.728786	0.733364	0.769918	0.718926	0.71674	0.731439	0.717786	0.665154	0.627702	0.595006	0.786171	0.78432	0.765654	0.755932	0.763694	0.801001	0.78205	0.817872	0.795501
Phosphocreatine	0.852503	0.847087	0.857475	0.847514	0.839787	0.837345	0.830971	0.81257	0.818382	0.850562	0.842306	0.834125	0.829027	0.867623	0.758945	0.762166	0.791667	0.762514	0.757548	0.785428	0.84929	0.835985	0.847928	0.817454	0.797015	0.7812	0.867352	0.747933	0.751746	0.785957	0.705324	0.708971	0.74424	0.697276	0.695053	0.709582	0.696798	0.644808	0.608755	0.575479	0.751792	0.750063	0.731819	0.722342	0.730814	0.767275	0.748996	0.782083	0.760088
Oleamide	0.884897	0.878276	0.888574	0.880414	0.872022	0.867333	0.860161	0.840526	0.848791	0.886825	0.878441	0.868754	0.863926	0.90382	0.791958	0.793461	0.826627	0.791966	0.785114	0.816702	0.89088	0.876404	0.887515	0.858192	0.836882	0.818752	0.913689	0.788275	0.789953	0.82727	0.740463	0.741991	0.7787	0.736392	0.733746	0.749886	0.737723	0.680058	0.642774	0.603054	0.762655	0.761023	0.741344	0.731195	0.742906	0.782221	0.763214	0.793313	0.769214
4-methyleneglutamic acid	0.612595	0.601407	0.60534	0.614088	0.605826	0.588342	0.579709	0.562585	0.583052	0.639976	0.635401	0.620806	0.620524	0.647023	0.57583	0.564711	0.604487	0.551415	0.535463	0.574824	0.678297	0.663878	0.66308	0.658036	0.642663	0.618783	0.720914	0.624469	0.610566	0.648339	0.567685	0.553835	0.579907	0.593172	0.589094	0.607264	0.606165	0.541798	0.516914	0.455194	0.411007	0.41095	0.392425	0.383344	0.410718	0.447638	0.43426	0.427052	0.401983
(2s,4s)-4-amino-2-hydroxy-2-methylpentanedioic acid	0.550225	0.538669	0.541473	0.552615	0.544634	0.525682	0.517092	0.500906	0.522653	0.58076	0.57693	0.562022	0.562467	0.586013	0.523493	0.510733	0.550294	0.495994	0.479109	0.518453	0.623279	0.609326	0.606672	0.605621	0.591672	0.567639	0.667677	0.578856	0.562932	0.599583	0.522451	0.50661	0.530178	0.551799	0.547624	0.56554	0.566222	0.502833	0.480694	0.417452	0.342483	0.342676	0.324919	0.316294	0.345275	0.38065	0.368583	0.355712	0.331284
Propionylcarnitine	0.608394	0.598223	0.602585	0.609222	0.601365	0.58603	0.57798	0.561476	0.579702	0.631876	0.627157	0.613786	0.61307	0.639547	0.567951	0.558642	0.595749	0.547184	0.532938	0.569537	0.664873	0.65118	0.651597	0.644414	0.629235	0.607133	0.703375	0.608963	0.597302	0.633115	0.555943	0.544313	0.570112	0.577222	0.573492	0.590541	0.588406	0.527964	0.503119	0.446699	0.424856	0.424646	0.406946	0.39822	0.422661	0.457945	0.44469	0.441528	0.417826
L-gulonolactone	0.551671	0.542767	0.546877	0.5522	0.545194	0.531976	0.524853	0.510058	0.525873	0.571707	0.567368	0.555625	0.554828	0.578891	0.513669	0.505814	0.53865	0.496016	0.483639	0.515982	0.599915	0.58771	0.588498	0.581248	0.567515	0.54802	0.633533	0.548388	0.53854	0.570438	0.501453	0.491626	0.514988	0.519383	0.516109	0.53123	0.528941	0.475314	0.452741	0.403232	0.390887	0.390645	0.374832	0.367019	0.388251	0.419778	0.407769	0.406255	0.385167
[similar to: r-1 methanandamide phosphate; 未mass: -223.3286 da]	0.938455	0.937776	0.951767	0.929286	0.922742	0.931443	0.927359	0.909927	0.904531	0.915484	0.905413	0.902717	0.894657	0.938038	0.813407	0.826679	0.845704	0.83687	0.840369	0.857067	0.885677	0.874547	0.894485	0.848736	0.826733	0.818385	0.884101	0.760339	0.776588	0.804697	0.73238	0.74832	0.786617	0.70088	0.700229	0.710627	0.690697	0.653021	0.61259	0.603334	0.921147	0.918385	0.902223	0.893435	0.887349	0.919724	0.899779	0.958635	0.94113
O-acetylcarnitine	0.940217	0.939594	0.953639	0.93099	0.924456	0.933296	0.929236	0.911802	0.906268	0.916978	0.906878	0.904244	0.896143	0.939615	0.814696	0.828098	0.847013	0.838414	0.842016	0.858594	0.886808	0.875696	0.895744	0.849778	0.827739	0.819473	0.884998	0.761087	0.777496	0.805555	0.73328	0.749378	0.787742	0.701476	0.700844	0.7112	0.69117	0.653634	0.61312	0.604141	0.923885	0.921109	0.904959	0.896172	0.889908	0.922261	0.902279	0.961488	0.944022
Hexanoylcarnitine	0.913843	0.913157	0.926769	0.90493	0.898549	0.906969	0.902979	0.885992	0.880791	0.89157	0.881768	0.879113	0.871275	0.913515	0.792176	0.805055	0.823642	0.814933	0.818299	0.834623	0.862675	0.851821	0.871205	0.826712	0.805283	0.797113	0.861239	0.740688	0.756455	0.783871	0.713375	0.728842	0.766137	0.682805	0.682164	0.692314	0.672934	0.636156	0.596789	0.587649	0.896557	0.893872	0.878115	0.86955	0.863695	0.895257	0.875834	0.933043	0.915966
2-bromophenol	0.873341	0.872435	0.885323	0.864998	0.858806	0.866314	0.862361	0.845993	0.841581	0.853042	0.843721	0.840885	0.833511	0.873836	0.758112	0.769959	0.78836	0.778934	0.781726	0.79799	0.826775	0.816236	0.834438	0.792496	0.771993	0.763755	0.82642	0.710847	0.725344	0.751997	0.683846	0.698062	0.73373	0.655704	0.655006	0.664972	0.646728	0.610653	0.573066	0.563034	0.852387	0.849861	0.834617	0.826354	0.821489	0.85202	0.833449	0.88706	0.870421
[similar to: adenosine 5'-phosphosulfate; 未mass: -329.0905 da]	0.896817	0.8977	0.911811	0.886988	0.881304	0.89292	0.889868	0.874029	0.865452	0.868825	0.858916	0.858169	0.849756	0.891472	0.770923	0.786425	0.800706	0.799007	0.80495	0.81685	0.832104	0.822488	0.84351	0.796253	0.77537	0.77002	0.824376	0.708338	0.727359	0.751452	0.687112	0.705802	0.742247	0.650446	0.650345	0.658658	0.637915	0.60758	0.568728	0.567819	0.907401	0.904513	0.890204	0.882283	0.871999	0.900688	0.881678	0.944427	0.929643
Pyrrolidine	0.888077	0.889276	0.903407	0.878118	0.872609	0.884813	0.881971	0.86646	0.857241	0.859076	0.849204	0.848852	0.840371	0.881735	0.762053	0.778003	0.791317	0.791065	0.797502	0.808425	0.820966	0.811661	0.832896	0.785349	0.7647	0.759959	0.811995	0.697561	0.717138	0.740409	0.677707	0.696948	0.733005	0.640005	0.640016	0.647904	0.627003	0.598166	0.559647	0.56043	0.904311	0.901398	0.88747	0.879727	0.868596	0.896527	0.877714	0.941231	0.927003
Pregabalin	0.932675	0.932971	0.947346	0.922886	0.916743	0.927483	0.923964	0.907159	0.899628	0.906016	0.895827	0.894307	0.885847	0.929125	0.804344	0.819321	0.835757	0.831252	0.836377	0.8504	0.871172	0.860758	0.881821	0.834111	0.812334	0.805703	0.865662	0.744078	0.762441	0.788622	0.719773	0.737806	0.775771	0.684306	0.683989	0.693294	0.672411	0.63856	0.598243	0.594074	0.932667	0.929765	0.914422	0.90599	0.89711	0.927859	0.908069	0.970686	0.954521
1-oxo-1,2,4-butanetricarboxylic acid	0.802843	0.803553	0.816147	0.7941	0.788981	0.799207	0.796431	0.782208	0.774709	0.778101	0.769245	0.76848	0.760987	0.798318	0.690476	0.704206	0.717195	0.715321	0.720505	0.731371	0.74566	0.736998	0.755714	0.713595	0.694892	0.689965	0.739069	0.635072	0.651917	0.673631	0.615782	0.632332	0.664967	0.583303	0.583185	0.590712	0.572232	0.544778	0.510009	0.508778	0.810895	0.808323	0.795454	0.788337	0.779366	0.805166	0.788146	0.843978	0.830641
Imazapyr	0.904239	0.905862	0.920445	0.893818	0.888359	0.901652	0.898982	0.883404	0.873119	0.873123	0.862996	0.863119	0.854297	0.896482	0.774242	0.791222	0.803755	0.80527	0.812506	0.822563	0.832156	0.822949	0.845088	0.795746	0.774759	0.770622	0.821387	0.705456	0.726308	0.749275	0.686684	0.707184	0.743858	0.646572	0.64672	0.654325	0.632598	0.604725	0.565449	0.568331	0.927895	0.924864	0.910981	0.903222	0.890714	0.918563	0.89942	0.965802	0.951826
(2e)-2,5-dichloro-4-oxo-2-hexenedioic acid	0.913183	0.915024	0.929849	0.902519	0.897081	0.91094	0.908356	0.892731	0.881894	0.880964	0.870699	0.871064	0.862061	0.904698	0.781057	0.798577	0.81072	0.813138	0.820789	0.83041	0.838507	0.829343	0.85196	0.801664	0.780488	0.776656	0.826811	0.710028	0.731546	0.754375	0.691794	0.712951	0.749968	0.65042	0.650638	0.658104	0.635939	0.608537	0.568845	0.572801	0.940646	0.937552	0.923682	0.915909	0.902689	0.930516	0.911192	0.979087	0.965229
Streptidine	0.886017	0.88796	0.902421	0.87556	0.870342	0.884129	0.881709	0.866634	0.855767	0.854134	0.844146	0.844688	0.83588	0.877275	0.757164	0.774452	0.785833	0.788873	0.796563	0.805481	0.812093	0.803307	0.825453	0.77629	0.755759	0.752311	0.800105	0.687026	0.708263	0.730129	0.669899	0.690783	0.726683	0.629081	0.629346	0.636424	0.614743	0.588739	0.550206	0.55486	0.915453	0.912426	0.899085	0.891592	0.878306	0.905074	0.886329	0.952874	0.939628
(-)-febrifugine	0.865052	0.867718	0.882208	0.854308	0.849499	0.864617	0.86268	0.848373	0.836047	0.830893	0.820997	0.822445	0.813489	0.854035	0.736038	0.754333	0.763487	0.76984	0.778653	0.785323	0.785713	0.777646	0.800257	0.750481	0.730508	0.728461	0.770886	0.661603	0.684091	0.704049	0.647638	0.669763	0.704736	0.604492	0.605011	0.611107	0.589087	0.566545	0.528815	0.537342	0.907404	0.904324	0.891869	0.884793	0.869579	0.894584	0.876309	0.944542	0.932586
Chloral hydrate	0.853067	0.854571	0.868316	0.843255	0.838094	0.850577	0.848043	0.833332	0.82369	0.823818	0.81427	0.814353	0.806043	0.845836	0.730539	0.746509	0.758401	0.759711	0.766493	0.776051	0.785315	0.776611	0.797462	0.750975	0.731173	0.727224	0.775264	0.665855	0.685465	0.707181	0.648049	0.667327	0.701929	0.610322	0.610452	0.617656	0.597188	0.570793	0.533744	0.536323	0.874906	0.872051	0.858934	0.851606	0.839885	0.866197	0.848137	0.910647	0.897428
Lt9970000	0.829293	0.831115	0.844651	0.819505	0.814622	0.827531	0.825268	0.811159	0.800982	0.799442	0.790093	0.790603	0.782358	0.821103	0.708679	0.724866	0.735511	0.738368	0.74557	0.75391	0.760079	0.751857	0.772589	0.726567	0.707351	0.704128	0.748848	0.643012	0.662896	0.683356	0.626991	0.646544	0.680145	0.588775	0.589024	0.595646	0.57535	0.551021	0.514954	0.519324	0.85689	0.854056	0.841571	0.834559	0.822116	0.847167	0.829622	0.891917	0.879522
2-(1,5-dihydroxy-4-oxo-2-cyclohexen-1-yl)-5-hydroxy-3,6,7-trimethoxy-4h-chromen-4-one	0.770551	0.774455	0.788102	0.759916	0.7562	0.772964	0.772088	0.760161	0.745768	0.734092	0.724993	0.728109	0.719423	0.755798	0.649246	0.668358	0.672618	0.685009	0.695455	0.697346	0.685624	0.679456	0.701563	0.653693	0.636045	0.636845	0.666205	0.571088	0.594608	0.609621	0.564133	0.587294	0.618294	0.519146	0.520129	0.523939	0.502629	0.48821	0.454387	0.469908	0.835361	0.832368	0.82241	0.816582	0.798568	0.818595	0.802367	0.869641	0.860933
[similar to: orotidine 5'-monophosphate; 未mass: -150.0900 da]	0.791236	0.795513	0.809656	0.780129	0.776413	0.794204	0.793454	0.78135	0.765972	0.752741	0.743348	0.746868	0.737824	0.775221	0.665555	0.685674	0.689366	0.70327	0.714451	0.715683	0.70153	0.695376	0.718421	0.668646	0.65055	0.651831	0.680502	0.583222	0.607985	0.622917	0.577042	0.601429	0.633235	0.529698	0.530799	0.534427	0.512248	0.498434	0.463666	0.480992	0.862532	0.859416	0.849389	0.843488	0.824209	0.84438	0.827725	0.897943	0.889341
[similar to: veratrole; 未mass: 41.8286 da]	0.82285	0.826604	0.840976	0.811782	0.80766	0.824665	0.8235	0.810541	0.796098	0.785555	0.775916	0.778747	0.769664	0.808438	0.695046	0.71469	0.720298	0.731701	0.742151	0.74527	0.736031	0.729169	0.752242	0.702082	0.683198	0.683339	0.716982	0.614804	0.638973	0.655756	0.605888	0.629682	0.662828	0.559628	0.560536	0.565045	0.542749	0.525814	0.489753	0.504174	0.8847	0.881572	0.870629	0.864277	0.846252	0.868249	0.850906	0.920981	0.911154
N-(tert-butoxycarbonyl)-l-leucine	0.780707	0.783847	0.797279	0.770499	0.766432	0.781658	0.780318	0.767798	0.755035	0.746984	0.737917	0.7401	0.731677	0.768394	0.661209	0.679071	0.685464	0.694428	0.703627	0.707703	0.702263	0.695472	0.716821	0.670204	0.652247	0.651658	0.685902	0.588343	0.610312	0.626998	0.578371	0.599995	0.631486	0.536287	0.537005	0.541729	0.521043	0.503415	0.46926	0.480759	0.831926	0.829027	0.818331	0.812173	0.796302	0.817791	0.801322	0.866019	0.85616
Leu-leu	0.702826	0.708458	0.721908	0.691685	0.689065	0.708819	0.70917	0.699399	0.681647	0.661405	0.652722	0.658037	0.649155	0.682683	0.583538	0.604782	0.603396	0.623814	0.636856	0.633096	0.606064	0.601817	0.624642	0.576196	0.560295	0.564576	0.579941	0.496201	0.522377	0.532328	0.497283	0.523082	0.551151	0.447376	0.448977	0.450258	0.428526	0.423039	0.391898	0.416784	0.79861	0.795544	0.787997	0.783326	0.760855	0.77608	0.761347	0.831501	0.826186
Leu-val	0.698904	0.704671	0.718126	0.687709	0.685165	0.705168	0.705609	0.695981	0.677957	0.657058	0.648392	0.653876	0.644966	0.678336	0.579587	0.601019	0.599217	0.620253	0.633505	0.629325	0.601131	0.597018	0.61993	0.571371	0.555573	0.560116	0.574478	0.491448	0.517857	0.527452	0.49312	0.519151	0.547046	0.442779	0.444427	0.445525	0.42373	0.418889	0.387899	0.413508	0.797099	0.794023	0.786642	0.782049	0.759218	0.774113	0.759468	0.829937	0.824863
Meprobamate	0.726497	0.732477	0.746456	0.71487	0.71222	0.732981	0.733432	0.723417	0.704713	0.683055	0.674049	0.679733	0.670478	0.705163	0.602529	0.62478	0.622944	0.644748	0.658498	0.654192	0.624997	0.620712	0.644511	0.594067	0.577644	0.582341	0.59735	0.511021	0.53844	0.548439	0.512708	0.539734	0.568732	0.460441	0.462149	0.463305	0.440666	0.435581	0.403369	0.429915	0.828315	0.82512	0.817437	0.812658	0.788967	0.804472	0.789248	0.862438	0.857146
His-tyr	0.71228	0.718394	0.732222	0.700705	0.698201	0.719098	0.71968	0.709995	0.691095	0.668696	0.65982	0.665693	0.656502	0.690551	0.589687	0.611966	0.609525	0.63201	0.645919	0.64103	0.610421	0.606388	0.630044	0.580006	0.563929	0.568965	0.582293	0.49802	0.525477	0.534825	0.500577	0.527641	0.556047	0.448254	0.450014	0.450882	0.428406	0.424352	0.392735	0.420065	0.81656	0.813387	0.806041	0.801434	0.777473	0.792304	0.777387	0.850213	0.845344
Danegaptide	0.74337	0.74861	0.762488	0.732085	0.729047	0.748395	0.748368	0.73765	0.720475	0.702388	0.693336	0.698102	0.689039	0.724381	0.620194	0.641344	0.641703	0.660142	0.67272	0.670642	0.647709	0.64274	0.665961	0.616377	0.59949	0.602788	0.622992	0.533377	0.559428	0.571248	0.53195	0.557618	0.587378	0.482237	0.483686	0.485801	0.463611	0.455152	0.422316	0.444922	0.831979	0.828853	0.820338	0.815175	0.7935	0.810656	0.79505	0.866205	0.859674
Mebutamate	0.694678	0.700773	0.714322	0.683298	0.680904	0.701568	0.702209	0.692833	0.674107	0.651653	0.642972	0.648857	0.639833	0.673062	0.574566	0.596537	0.593822	0.616329	0.630117	0.625001	0.594112	0.590266	0.613507	0.564402	0.548734	0.553872	0.566146	0.484147	0.511225	0.520105	0.487111	0.513803	0.541494	0.435519	0.43728	0.437987	0.415922	0.412454	0.3816	0.408935	0.798707	0.795591	0.788524	0.784072	0.76032	0.774591	0.760047	0.831631	0.827049
Tetraacetylethylenediamine	0.691015	0.697273	0.710845	0.679559	0.67725	0.698226	0.698972	0.68975	0.670687	0.647447	0.638775	0.644862	0.635795	0.668882	0.570721	0.592935	0.589737	0.612986	0.627032	0.621426	0.589159	0.585463	0.608832	0.559535	0.543969	0.549414	0.560547	0.479265	0.506646	0.515126	0.482914	0.509906	0.537432	0.430757	0.432575	0.433071	0.410906	0.408179	0.37746	0.405663	0.797954	0.794823	0.787938	0.78357	0.759373	0.773283	0.758822	0.830858	0.826548
Vorinostat	0.679457	0.685458	0.69873	0.668299	0.665973	0.686269	0.686918	0.677769	0.659365	0.63722	0.628721	0.634524	0.625679	0.658188	0.561812	0.583374	0.580618	0.602807	0.616359	0.611251	0.580726	0.576991	0.599773	0.551653	0.536332	0.541425	0.553212	0.473068	0.499642	0.508256	0.476109	0.502305	0.529386	0.425477	0.427213	0.427863	0.406237	0.402991	0.372808	0.399749	0.781908	0.778854	0.771971	0.767629	0.744282	0.758183	0.743959	0.814142	0.809711
Mutagen x	0.677104	0.683707	0.697234	0.665551	0.663464	0.685033	0.686025	0.677241	0.65751	0.632556	0.623971	0.630498	0.621395	0.653896	0.557266	0.5799	0.575567	0.600421	0.614984	0.608243	0.572909	0.569601	0.593105	0.543712	0.528503	0.534647	0.542959	0.464	0.491904	0.499362	0.469265	0.496777	0.523701	0.416139	0.418081	0.418068	0.395827	0.394898	0.364732	0.394807	0.790232	0.787087	0.78069	0.776557	0.751473	0.764411	0.750257	0.822842	0.819217
4-hydroxy-5-methylfuran-3(2h)-one	0.658292	0.663454	0.675996	0.647936	0.64544	0.663697	0.663963	0.65475	0.638377	0.619944	0.611832	0.616675	0.608408	0.639793	0.547037	0.566726	0.565717	0.584341	0.596364	0.593143	0.56872	0.564667	0.5859	0.540786	0.525881	0.529696	0.544714	0.466115	0.490373	0.499899	0.466721	0.490628	0.51693	0.420463	0.421924	0.423244	0.403016	0.397455	0.368304	0.391024	0.745993	0.74314	0.735987	0.731577	0.710862	0.725288	0.711485	0.776711	0.771589
Pro-met	0.633588	0.638642	0.650755	0.623561	0.62119	0.638947	0.63925	0.630429	0.614479	0.596342	0.588518	0.593281	0.585285	0.615507	0.526151	0.545258	0.54407	0.562371	0.574088	0.570762	0.54658	0.542736	0.563282	0.519664	0.505326	0.509145	0.523128	0.447603	0.471146	0.480159	0.448493	0.471696	0.497002	0.403604	0.405039	0.406219	0.386655	0.38162	0.35355	0.375861	0.719514	0.716754	0.709933	0.705715	0.685527	0.699286	0.686004	0.749146	0.744325
2,4-dimethylthiazole	0.572529	0.5784	0.589976	0.562561	0.560903	0.579759	0.580757	0.573483	0.556159	0.53373	0.526417	0.532279	0.524449	0.551979	0.470001	0.489668	0.485274	0.507553	0.520354	0.513894	0.481751	0.479146	0.499388	0.456962	0.444128	0.449815	0.455262	0.388916	0.413164	0.418952	0.394396	0.418307	0.441044	0.348245	0.349985	0.34967	0.330546	0.330823	0.305275	0.332193	0.673267	0.670562	0.665366	0.66196	0.639914	0.650431	0.638473	0.701067	0.698366
Citiolone	0.535407	0.541541	0.552678	0.525637	0.524325	0.543347	0.544638	0.53818	0.520542	0.496584	0.489626	0.495877	0.488256	0.51411	0.436839	0.456415	0.450667	0.474336	0.4874	0.479653	0.444514	0.442506	0.462264	0.4211	0.40916	0.415582	0.417127	0.35602	0.380165	0.384414	0.363455	0.387268	0.408467	0.317537	0.319383	0.318406	0.299808	0.30245	0.278469	0.306977	0.641016	0.638381	0.634	0.631015	0.60852	0.61741	0.606248	0.667518	0.665809
Indole-3-acetic acid	0.565377	0.571685	0.583365	0.555177	0.553729	0.573453	0.574723	0.567814	0.549563	0.525044	0.517727	0.524127	0.516158	0.543431	0.461993	0.482356	0.476714	0.500968	0.514477	0.506742	0.470963	0.468731	0.489379	0.4463	0.433675	0.440169	0.442726	0.377954	0.403067	0.407857	0.385202	0.409969	0.432371	0.337434	0.339326	0.338473	0.319021	0.321188	0.295888	0.325121	0.673918	0.671163	0.666412	0.663208	0.639944	0.649579	0.637787	0.701772	0.699754
Penicillin g	0.56532	0.571674	0.583375	0.555088	0.553658	0.57348	0.574775	0.567891	0.54954	0.524809	0.517485	0.523939	0.515949	0.543227	0.461754	0.4822	0.476441	0.500895	0.514481	0.506625	0.470486	0.468284	0.488989	0.445808	0.433189	0.439761	0.442064	0.377366	0.402582	0.407288	0.384778	0.409647	0.432042	0.336818	0.338725	0.337824	0.318322	0.32066	0.295356	0.324825	0.674667	0.671905	0.667188	0.663999	0.640603	0.650169	0.63838	0.702554	0.700595
Benzylpenicillin	0.542645	0.549145	0.56057	0.532545	0.531322	0.551211	0.552677	0.546283	0.527774	0.502179	0.495075	0.501749	0.493893	0.520145	0.441561	0.461924	0.455376	0.480613	0.494334	0.485732	0.447881	0.446035	0.466424	0.42405	0.411974	0.41897	0.418973	0.357453	0.382571	0.386365	0.366004	0.39078	0.412237	0.318251	0.320218	0.318928	0.299765	0.303492	0.279147	0.309509	0.654701	0.651984	0.647754	0.644818	0.621191	0.629785	0.618482	0.681783	0.680411
Phenol red	0.560704	0.567389	0.579179	0.550291	0.549015	0.569497	0.570994	0.564371	0.545316	0.519018	0.511683	0.518541	0.510439	0.537558	0.456389	0.477372	0.470687	0.496623	0.510747	0.501943	0.463085	0.461156	0.482182	0.438472	0.425991	0.433165	0.433344	0.36973	0.395612	0.399589	0.378452	0.403979	0.426154	0.329246	0.331268	0.329969	0.310203	0.313936	0.288785	0.319992	0.675923	0.673121	0.668727	0.665683	0.641363	0.65029	0.63861	0.703882	0.702424
1,4-bis(2-ethylhexyl) sulfosuccinate	0.558395	0.560811	0.570501	0.550975	0.548129	0.559386	0.558523	0.549659	0.54015	0.533603	0.527087	0.528851	0.522748	0.549038	0.472214	0.485303	0.489442	0.496603	0.503471	0.505936	0.500702	0.495958	0.511447	0.477711	0.464883	0.464754	0.488308	0.418778	0.43488	0.446506	0.412256	0.428107	0.450613	0.381426	0.381998	0.385196	0.370212	0.358234	0.333781	0.342887	0.598043	0.595941	0.588418	0.584067	0.572218	0.587338	0.575564	0.622561	0.615725
Beta-d-glucosyl crocetin	0.558664	0.561118	0.57083	0.551215	0.548381	0.559723	0.558879	0.55003	0.540436	0.533716	0.527189	0.528998	0.522875	0.549184	0.472288	0.485451	0.489499	0.496824	0.503758	0.506127	0.500602	0.495879	0.511423	0.477586	0.464756	0.464689	0.488053	0.418543	0.434736	0.446302	0.412149	0.42809	0.450604	0.381147	0.381732	0.384893	0.369861	0.358012	0.333543	0.342843	0.59898	0.596871	0.589371	0.585029	0.573068	0.588141	0.576363	0.623538	0.616746
6185892	0.449617	0.453192	0.461782	0.442509	0.440823	0.453399	0.453608	0.447342	0.436048	0.42323	0.41768	0.421047	0.415378	0.436822	0.373423	0.386961	0.386146	0.399084	0.40738	0.405049	0.387978	0.385243	0.399808	0.368881	0.358706	0.361396	0.371381	0.317769	0.334451	0.340867	0.318361	0.334801	0.35276	0.286555	0.287569	0.288418	0.274547	0.270933	0.251015	0.266789	0.510393	0.508436	0.503587	0.500591	0.486297	0.496078	0.486652	0.531412	0.527976
Ethylenediaminetetraacetic acid	0.397894	0.399785	0.406771	0.392489	0.390524	0.39891	0.398389	0.392163	0.38501	0.379561	0.374886	0.376346	0.371918	0.39068	0.335778	0.345416	0.347935	0.353782	0.358963	0.360272	0.355207	0.351939	0.363194	0.338764	0.329639	0.329837	0.345689	0.29639	0.30825	0.316229	0.29235	0.304026	0.320046	0.269656	0.270121	0.272221	0.261356	0.253447	0.235999	0.243365	0.429141	0.427616	0.422381	0.419333	0.410397	0.420922	0.412538	0.446745	0.442089
3-hydroxy-n-[(3s)-2-oxotetrahydro-3-furanyl]octanamide	0.958151	0.954539	0.967412	0.950821	0.943055	0.945647	0.939857	0.920499	0.921505	0.946209	0.936469	0.93023	0.923353	0.967151	0.842665	0.850842	0.877697	0.855828	0.854447	0.879226	0.93147	0.918164	0.934768	0.894801	0.872061	0.858532	0.941717	0.811105	0.821037	0.855012	0.772092	0.781778	0.821171	0.752439	0.750783	0.76449	0.747378	0.698107	0.657238	0.632663	0.888791	0.886445	0.867777	0.857896	0.860198	0.89754	0.877079	0.924776	0.903198
L(-)-carnitine	0.957444	0.954357	0.967472	0.949755	0.94219	0.945905	0.940409	0.921345	0.921185	0.943451	0.933622	0.928011	0.920897	0.964751	0.839863	0.848995	0.874501	0.854947	0.854453	0.877831	0.925916	0.912967	0.93023	0.889087	0.866413	0.853789	0.934034	0.804279	0.815395	0.848401	0.767168	0.778025	0.817337	0.745292	0.743814	0.756958	0.739279	0.691978	0.651065	0.629214	0.897382	0.894953	0.876686	0.866975	0.867752	0.9043	0.883871	0.933751	0.912851
[similar to: 10-nitrooleate; 未mass: 283.2867 da]	0.924146	0.920895	0.933422	0.916914	0.909511	0.912511	0.907055	0.888508	0.888961	0.911712	0.902275	0.896535	0.889794	0.932077	0.811789	0.820103	0.845414	0.825343	0.824405	0.84769	0.896248	0.883569	0.899882	0.860797	0.838886	0.826235	0.905188	0.77955	0.789659	0.822009	0.742754	0.75262	0.790592	0.722804	0.721285	0.73426	0.717498	0.670835	0.631383	0.608884	0.861359	0.859059	0.841225	0.831767	0.83331	0.868986	0.849259	0.896249	0.875732
Creatine	0.908982	0.90588	0.918249	0.901801	0.894555	0.897714	0.892402	0.874211	0.87444	0.896371	0.887071	0.88154	0.874865	0.916471	0.798065	0.806421	0.83107	0.811754	0.810995	0.833642	0.880641	0.868234	0.884404	0.845737	0.824195	0.811917	0.889042	0.765606	0.775769	0.807414	0.72976	0.739683	0.777022	0.709723	0.708262	0.720922	0.704327	0.658788	0.61997	0.598341	0.848936	0.846658	0.82919	0.819917	0.821152	0.856101	0.8367	0.88333	0.863272
Gamma-aminobutyric acid	0.939902	0.935375	0.947526	0.933395	0.925413	0.925834	0.919608	0.900092	0.903276	0.932067	0.922696	0.9154	0.90911	0.951908	0.830723	0.836932	0.865781	0.839997	0.836972	0.863886	0.922899	0.909191	0.924214	0.887281	0.864882	0.849923	0.936947	0.807389	0.814887	0.849994	0.765591	0.772872	0.811612	0.750529	0.748569	0.763058	0.747362	0.695388	0.655435	0.62623	0.854439	0.852298	0.833256	0.823257	0.828385	0.866461	0.846357	0.888968	0.866552
Ophthalmic acid	0.917934	0.913497	0.925356	0.911591	0.903789	0.904166	0.898076	0.879008	0.882154	0.910346	0.901197	0.894053	0.887918	0.929712	0.811375	0.817409	0.845625	0.820372	0.817391	0.843718	0.90148	0.888082	0.902733	0.8667	0.844823	0.830186	0.915265	0.788712	0.795998	0.830314	0.747833	0.754907	0.792743	0.733192	0.731273	0.74544	0.730128	0.679309	0.640293	0.611687	0.834183	0.832094	0.813485	0.803714	0.808769	0.84598	0.826345	0.867892	0.845979
7-hydroxycoumarine	0.952071	0.950246	0.96389	0.943559	0.936498	0.942876	0.938102	0.91981	0.916872	0.933247	0.923241	0.919149	0.911498	0.955317	0.829952	0.841325	0.863517	0.849554	0.851176	0.871125	0.909115	0.897069	0.915835	0.872047	0.849617	0.839199	0.912131	0.784919	0.798812	0.829382	0.75248	0.766087	0.805053	0.725392	0.724345	0.736097	0.717138	0.674709	0.633852	0.618574	0.914392	0.911775	0.894535	0.885266	0.882406	0.91692	0.896647	0.951534	0.932332
Aspirin	0.95848	0.95677	0.970568	0.949822	0.942761	0.949457	0.944721	0.926375	0.923132	0.939026	0.92893	0.924962	0.917201	0.961336	0.835007	0.846691	0.868708	0.855212	0.857061	0.876807	0.914047	0.902004	0.921061	0.876683	0.854115	0.843846	0.916566	0.788683	0.80296	0.833506	0.756483	0.770469	0.809685	0.728666	0.727656	0.739351	0.720123	0.677881	0.636731	0.622011	0.922805	0.920149	0.902887	0.893595	0.890345	0.924904	0.904499	0.960296	0.941126
[similar to: d-glucose 6-phosphate; 未mass: -104.0942 da]	0.93608	0.933723	0.946867	0.928101	0.920951	0.926011	0.921005	0.90272	0.901085	0.919787	0.910054	0.905359	0.898098	0.941085	0.818357	0.828505	0.851755	0.835553	0.836194	0.857296	0.899082	0.886864	0.904593	0.862837	0.840732	0.829525	0.904329	0.778435	0.790813	0.821886	0.744526	0.756636	0.795004	0.720301	0.719081	0.73123	0.713212	0.669417	0.629325	0.611392	0.889085	0.886603	0.869235	0.859947	0.858774	0.893534	0.873583	0.925161	0.905569
[similar to: guanidinosuccinic acid; 未mass: 23.9977 da]	0.86297	0.860611	0.872637	0.855746	0.849084	0.853344	0.848626	0.831669	0.83058	0.848689	0.839751	0.835199	0.828592	0.86819	0.755225	0.764235	0.786146	0.770385	0.770657	0.790608	0.830609	0.81922	0.835324	0.797262	0.776865	0.766213	0.836208	0.719873	0.730857	0.759841	0.68794	0.698682	0.734072	0.66641	0.665222	0.676621	0.660217	0.619149	0.582214	0.564712	0.816327	0.814069	0.797919	0.789298	0.788764	0.821084	0.802685	0.849439	0.831139
2-hydroxy-1,2-diphenylethyl hydrogen sulfate	0.754893	0.754077	0.765201	0.747705	0.742341	0.748758	0.745323	0.731157	0.727418	0.737479	0.729428	0.726937	0.720578	0.755429	0.655431	0.66561	0.6816	0.673307	0.675663	0.68981	0.714953	0.705821	0.721512	0.685334	0.667609	0.660432	0.714781	0.614834	0.627289	0.650388	0.591376	0.603589	0.634423	0.567194	0.566579	0.575228	0.559496	0.52819	0.495706	0.486862	0.736192	0.734015	0.720813	0.71366	0.709552	0.735991	0.719938	0.766136	0.751712
(11z)-eicoseneoylcarnitine	0.620221	0.620359	0.62989	0.613752	0.609645	0.616662	0.614289	0.603082	0.598205	0.602724	0.595959	0.594878	0.589279	0.618049	0.535126	0.544978	0.556056	0.552803	0.556112	0.565592	0.579867	0.572903	0.586834	0.555243	0.540756	0.536246	0.576441	0.495503	0.507581	0.525096	0.47913	0.49099	0.516242	0.455796	0.455565	0.461815	0.447993	0.425266	0.398463	0.395388	0.61918	0.617259	0.607013	0.601388	0.595653	0.616187	0.603025	0.644416	0.633592
Palmitoylcarnitine	0.617075	0.614231	0.622271	0.612713	0.60752	0.608074	0.604058	0.591314	0.593117	0.611423	0.605247	0.600611	0.596422	0.624541	0.544858	0.549172	0.567784	0.551423	0.549655	0.566984	0.604713	0.595799	0.605827	0.581282	0.566589	0.556988	0.613413	0.528542	0.533758	0.556574	0.501561	0.506632	0.532053	0.491121	0.489879	0.499255	0.488807	0.455161	0.428912	0.410405	0.563244	0.561817	0.549411	0.542886	0.545877	0.570687	0.557492	0.586014	0.57146
[similar to: sucrose; 未mass: -140.0707 da]	-0.485808	-0.480579	-0.485461	-0.484456	-0.479257	-0.473246	-0.468424	-0.456792	-0.464888	-0.493152	-0.488846	-0.481624	-0.479712	-0.501343	-0.441438	-0.439329	-0.461596	-0.43555	-0.429083	-0.450647	-0.503948	-0.49494	-0.498991	-0.486574	-0.474725	-0.462038	-0.522944	-0.45177	-0.449055	-0.472424	-0.419805	-0.417047	-0.437359	-0.424401	-0.422406	-0.432955	-0.428045	-0.390487	-0.370242	-0.340177	-0.390472	-0.389835	-0.377848	-0.37178	-0.382859	-0.406784	-0.396296	-0.406053	-0.390799
5-(5,7-dihydroxy-4-oxo-3,4-dihydro-2h-chromen-2-yl)-2-methoxyphenyl hydrogen sulfate	-0.686293	-0.690429	-0.702903	-0.676363	-0.673298	-0.689648	-0.689234	-0.678963	-0.664673	-0.651224	-0.642998	-0.646559	-0.638518	-0.671027	-0.575503	-0.593738	-0.595856	-0.609791	-0.620212	-0.620152	-0.604515	-0.59946	-0.619996	-0.575839	-0.560184	-0.562025	-0.584545	-0.500788	-0.523239	-0.53542	-0.496955	-0.51907	-0.546614	-0.454066	-0.455165	-0.45786	-0.438151	-0.427746	-0.397529	-0.414765	-0.755678	-0.752905	-0.744524	-0.739539	-0.721574	-0.738444	-0.724012	-0.786726	-0.779805
884916	-0.578959	-0.583443	-0.594447	-0.569889	-0.567673	-0.583611	-0.583815	-0.575683	-0.561405	-0.545448	-0.538324	-0.542518	-0.535272	-0.562866	-0.48134	-0.498555	-0.497808	-0.513946	-0.524426	-0.521739	-0.500693	-0.497091	-0.515695	-0.476145	-0.463031	-0.466292	-0.479803	-0.410596	-0.431806	-0.440282	-0.410932	-0.431834	-0.454972	-0.370484	-0.37175	-0.37297	-0.35524	-0.350146	-0.324516	-0.344213	-0.655119	-0.652618	-0.646287	-0.642391	-0.624332	-0.637101	-0.624959	-0.682092	-0.677517
S-methylglutathione	-0.56991	-0.573972	-0.584634	-0.561227	-0.558915	-0.573845	-0.57385	-0.565656	-0.552388	-0.538312	-0.531364	-0.535072	-0.528103	-0.555206	-0.475287	-0.491585	-0.491746	-0.506081	-0.515801	-0.514088	-0.496149	-0.49237	-0.51023	-0.472111	-0.459169	-0.461775	-0.477016	-0.408378	-0.428453	-0.437433	-0.407446	-0.427227	-0.450038	-0.369139	-0.370266	-0.371839	-0.354776	-0.348459	-0.323279	-0.340844	-0.638644	-0.63624	-0.629746	-0.625802	-0.609052	-0.622138	-0.610175	-0.664919	-0.659969
Cysteinylglycine	-0.695257	-0.697967	-0.709886	-0.686228	-0.682573	-0.695944	-0.694702	-0.683506	-0.672335	-0.665569	-0.657511	-0.659351	-0.651891	-0.684574	-0.589203	-0.604949	-0.610865	-0.618463	-0.626507	-0.630369	-0.626213	-0.620107	-0.639007	-0.597694	-0.581694	-0.58102	-0.611997	-0.524988	-0.544354	-0.559372	-0.515795	-0.534856	-0.562908	-0.478691	-0.479301	-0.483601	-0.465275	-0.449254	-0.41885	-0.428638	-0.739325	-0.736757	-0.727167	-0.721656	-0.707776	-0.727041	-0.712372	-0.769617	-0.760726
Maleamic acid	-0.714171	-0.716846	-0.729037	-0.704972	-0.701177	-0.714678	-0.713342	-0.701783	-0.690551	-0.684104	-0.675847	-0.677607	-0.669994	-0.703548	-0.605685	-0.62166	-0.628013	-0.63534	-0.643418	-0.647673	-0.644262	-0.637917	-0.657192	-0.615005	-0.59856	-0.597681	-0.6301	-0.540566	-0.560211	-0.575833	-0.530734	-0.550067	-0.578894	-0.493086	-0.493676	-0.498207	-0.479504	-0.462644	-0.431428	-0.440919	-0.757513	-0.754893	-0.744962	-0.739267	-0.725326	-0.745275	-0.730203	-0.788544	-0.779274
L-glutathione reduced	-0.686579	-0.688743	-0.700266	-0.678019	-0.67422	-0.68632	-0.68481	-0.673479	-0.663591	-0.659282	-0.651419	-0.652624	-0.645494	-0.677683	-0.583986	-0.598594	-0.605739	-0.610988	-0.618063	-0.623233	-0.62317	-0.616799	-0.634805	-0.59519	-0.579342	-0.577798	-0.611211	-0.524543	-0.542499	-0.558254	-0.513628	-0.531294	-0.559048	-0.479181	-0.47961	-0.484398	-0.466869	-0.449152	-0.419199	-0.426212	-0.721029	-0.718576	-0.708726	-0.703124	-0.690911	-0.710688	-0.696185	-0.750541	-0.741112
4,5-pyrenedione	-0.692794	-0.694266	-0.705549	-0.684651	-0.680553	-0.69123	-0.689311	-0.677497	-0.669108	-0.668054	-0.660253	-0.660619	-0.653754	-0.686114	-0.592242	-0.605672	-0.614693	-0.616858	-0.62279	-0.62989	-0.63544	-0.628538	-0.645793	-0.607462	-0.591404	-0.588626	-0.626262	-0.537773	-0.554269	-0.571453	-0.524208	-0.54043	-0.568505	-0.492498	-0.492689	-0.498274	-0.481375	-0.460864	-0.430741	-0.434131	-0.714959	-0.712599	-0.702132	-0.696259	-0.68601	-0.707011	-0.692353	-0.744181	-0.733763
P-dmea	-0.847129	-0.85076	-0.865443	-0.835898	-0.831567	-0.848569	-0.847239	-0.833773	-0.819427	-0.809656	-0.799777	-0.802412	-0.793169	-0.833047	-0.716532	-0.736325	-0.742693	-0.753402	-0.763763	-0.767595	-0.759931	-0.75271	-0.776163	-0.725064	-0.7056	-0.705344	-0.741271	-0.635737	-0.660084	-0.677786	-0.625717	-0.649685	-0.683832	-0.579096	-0.579951	-0.584841	-0.562147	-0.543845	-0.506754	-0.520387	-0.906658	-0.903476	-0.892036	-0.885424	-0.867551	-0.89054	-0.872677	-0.943827	-0.933412
2347	-0.856506	-0.859918	-0.874638	-0.845331	-0.840856	-0.857489	-0.856	-0.842247	-0.828319	-0.81964	-0.809699	-0.812054	-0.802829	-0.843105	-0.725544	-0.745079	-0.752178	-0.761866	-0.771902	-0.776462	-0.770755	-0.763282	-0.786662	-0.735595	-0.715892	-0.715189	-0.75294	-0.645861	-0.669887	-0.688253	-0.634802	-0.658451	-0.693002	-0.588774	-0.589551	-0.594769	-0.57211	-0.552648	-0.515182	-0.527626	-0.912111	-0.908935	-0.897177	-0.890411	-0.873095	-0.896719	-0.87865	-0.949488	-0.938629
1d-myo-inositol 1,2-cyclic phosphate	-0.785399	-0.789691	-0.803752	-0.774342	-0.770671	-0.78843	-0.787711	-0.775722	-0.760353	-0.747006	-0.737674	-0.741223	-0.732225	-0.769354	-0.660453	-0.680508	-0.684055	-0.69806	-0.709238	-0.710338	-0.695925	-0.689847	-0.712781	-0.663267	-0.645309	-0.646659	-0.674864	-0.578369	-0.603055	-0.617793	-0.5724	-0.596712	-0.628278	-0.525208	-0.526316	-0.529868	-0.507802	-0.494261	-0.459743	-0.47718	-0.856988	-0.853887	-0.843968	-0.838126	-0.818854	-0.838808	-0.822277	-0.892174	-0.883694
Glycine	-0.774582	-0.778674	-0.792473	-0.763776	-0.760103	-0.777313	-0.776526	-0.764626	-0.749784	-0.737275	-0.728098	-0.731429	-0.722621	-0.759214	-0.651947	-0.671466	-0.675324	-0.688514	-0.699297	-0.700757	-0.687657	-0.681569	-0.704006	-0.6555	-0.637775	-0.638865	-0.66746	-0.572088	-0.596112	-0.610902	-0.565695	-0.589353	-0.620499	-0.519758	-0.520803	-0.524456	-0.50285	-0.488973	-0.45495	-0.471415	-0.842683	-0.839648	-0.829761	-0.823955	-0.805361	-0.825247	-0.80894	-0.877274	-0.868731
2'-deoxyguanosine 5'-triphosphate (dgtp)	-0.79342	-0.797002	-0.810842	-0.782775	-0.778786	-0.795102	-0.793957	-0.781442	-0.7676	-0.757607	-0.74832	-0.751005	-0.742264	-0.779645	-0.670344	-0.689217	-0.694719	-0.705549	-0.715561	-0.718669	-0.710057	-0.703415	-0.725614	-0.677335	-0.659123	-0.659194	-0.691841	-0.593263	-0.616482	-0.632733	-0.584531	-0.607389	-0.639353	-0.540086	-0.540949	-0.545336	-0.52388	-0.507411	-0.472646	-0.486357	-0.852394	-0.849384	-0.838804	-0.832668	-0.815397	-0.836662	-0.819938	-0.887348	-0.877824
Udp-n-acetylglucosamine	-0.797031	-0.800459	-0.81428	-0.786455	-0.782385	-0.798409	-0.797165	-0.784503	-0.770976	-0.761724	-0.752426	-0.754921	-0.746219	-0.783741	-0.674103	-0.692749	-0.698709	-0.708841	-0.718611	-0.722182	-0.71487	-0.708085	-0.730167	-0.68206	-0.663749	-0.66353	-0.697261	-0.597987	-0.620924	-0.637556	-0.588606	-0.611185	-0.643312	-0.544687	-0.545496	-0.550083	-0.528717	-0.511545	-0.476645	-0.489539	-0.853267	-0.850271	-0.839517	-0.8333	-0.816446	-0.838057	-0.821251	-0.888247	-0.878465
L-(-)-3-phenyllactic acid	-0.671059	-0.668073	-0.676868	-0.666242	-0.660634	-0.661467	-0.657158	-0.643357	-0.645079	-0.664491	-0.657755	-0.652841	-0.648236	-0.678833	-0.592078	-0.596966	-0.616934	-0.599612	-0.597871	-0.616433	-0.656619	-0.646997	-0.65804	-0.6311	-0.615132	-0.604874	-0.665646	-0.573506	-0.579423	-0.604042	-0.544549	-0.550304	-0.577938	-0.532737	-0.531422	-0.541505	-0.530025	-0.493831	-0.465271	-0.445699	-0.614412	-0.612843	-0.59943	-0.592368	-0.595309	-0.622132	-0.607786	-0.639258	-0.623566
(2z)-2-benzylidene-3-oxobutyl hydrogen sulfate	-0.744054	-0.74086	-0.750668	-0.738631	-0.732457	-0.733632	-0.72892	-0.71368	-0.715328	-0.736311	-0.728821	-0.723511	-0.718351	-0.752297	-0.655994	-0.661629	-0.683472	-0.66478	-0.663048	-0.683319	-0.726955	-0.716364	-0.728758	-0.698619	-0.680924	-0.669751	-0.73649	-0.634497	-0.641324	-0.668409	-0.602808	-0.609453	-0.640082	-0.589212	-0.587793	-0.598849	-0.585991	-0.546292	-0.51461	-0.493513	-0.683312	-0.681554	-0.666769	-0.658975	-0.661896	-0.691465	-0.675562	-0.710953	-0.693703
Ho-dpeg8-oh	-0.751847	-0.748278	-0.758024	-0.746606	-0.74024	-0.74069	-0.735739	-0.720156	-0.722586	-0.745372	-0.737866	-0.732093	-0.727037	-0.761281	-0.664292	-0.669357	-0.692299	-0.671906	-0.669576	-0.690965	-0.737755	-0.726825	-0.73891	-0.709245	-0.691332	-0.679456	-0.748778	-0.645219	-0.651338	-0.679325	-0.611973	-0.617916	-0.6489	-0.599699	-0.598149	-0.609683	-0.597069	-0.555689	-0.523723	-0.500634	-0.684416	-0.682695	-0.667501	-0.659519	-0.663468	-0.693849	-0.677768	-0.712078	-0.694213
3-oxolauric acid	-0.771935	-0.768532	-0.778663	-0.766373	-0.759934	-0.760957	-0.756018	-0.740158	-0.742071	-0.764262	-0.756507	-0.75089	-0.745579	-0.780781	-0.680956	-0.686634	-0.709527	-0.689734	-0.687783	-0.709055	-0.755043	-0.743995	-0.756737	-0.725678	-0.707311	-0.695564	-0.765305	-0.659357	-0.666233	-0.694498	-0.626156	-0.632844	-0.66463	-0.612439	-0.610936	-0.622503	-0.609264	-0.56774	-0.534883	-0.512525	-0.707309	-0.705499	-0.690093	-0.681978	-0.685273	-0.716084	-0.699583	-0.735913	-0.717902
N-homo-?-linolenoylethanolamine	-0.842168	-0.838538	-0.849632	-0.836041	-0.829047	-0.830344	-0.825002	-0.807745	-0.809645	-0.833465	-0.824989	-0.818961	-0.813128	-0.851547	-0.74256	-0.74891	-0.773672	-0.752448	-0.750462	-0.773446	-0.822955	-0.810957	-0.824967	-0.790888	-0.770858	-0.758187	-0.833809	-0.718345	-0.726037	-0.756722	-0.682424	-0.68991	-0.72458	-0.667099	-0.665488	-0.678018	-0.663481	-0.618491	-0.582633	-0.558676	-0.773149	-0.771162	-0.754416	-0.745589	-0.748939	-0.78243	-0.76443	-0.804423	-0.784879
Cys-pro	-0.759153	-0.756352	-0.76658	-0.753303	-0.747173	-0.749356	-0.744802	-0.729497	-0.73016	-0.749452	-0.741725	-0.736853	-0.731377	-0.766089	-0.6674	-0.67399	-0.695113	-0.678052	-0.67706	-0.696533	-0.73745	-0.726948	-0.740181	-0.708375	-0.690364	-0.679748	-0.745323	-0.641926	-0.649933	-0.676743	-0.611232	-0.619043	-0.650248	-0.595402	-0.59411	-0.604907	-0.591281	-0.552467	-0.520078	-0.50092	-0.705268	-0.7034	-0.688654	-0.680844	-0.682491	-0.71199	-0.69578	-0.733828	-0.716808
N2-dimethylguanosine	-0.773881	-0.771065	-0.781511	-0.76789	-0.761656	-0.763968	-0.759347	-0.743767	-0.744353	-0.763835	-0.75595	-0.751032	-0.745431	-0.780823	-0.680181	-0.686972	-0.708404	-0.691188	-0.690245	-0.70999	-0.751385	-0.740706	-0.754247	-0.721732	-0.703375	-0.692621	-0.759249	-0.653904	-0.662157	-0.689415	-0.622758	-0.63081	-0.662617	-0.60645	-0.605146	-0.61611	-0.602176	-0.562756	-0.529733	-0.51041	-0.719658	-0.717747	-0.702745	-0.694795	-0.696358	-0.72637	-0.709847	-0.748803	-0.731503
1-deoxy-d-altro-heptulose 7-phosphate	-0.801957	-0.799643	-0.81076	-0.795328	-0.789092	-0.79279	-0.788337	-0.772514	-0.771773	-0.789164	-0.780881	-0.776506	-0.770422	-0.8072	-0.702336	-0.710485	-0.731157	-0.715975	-0.716023	-0.734884	-0.773015	-0.76235	-0.777159	-0.742069	-0.723103	-0.712996	-0.77871	-0.670424	-0.680354	-0.707509	-0.640314	-0.650022	-0.682922	-0.620826	-0.61968	-0.630402	-0.615293	-0.576679	-0.542373	-0.525479	-0.756463	-0.754385	-0.739287	-0.731237	-0.731094	-0.761308	-0.744205	-0.787139	-0.769979
N-伪-l-acetyl-arginine	-0.798675	-0.796003	-0.806896	-0.792329	-0.785982	-0.788872	-0.784233	-0.768279	-0.768361	-0.787384	-0.779203	-0.774407	-0.768518	-0.805083	-0.700996	-0.708436	-0.729958	-0.713221	-0.712644	-0.732402	-0.773278	-0.762412	-0.776688	-0.742591	-0.723668	-0.712971	-0.780443	-0.672064	-0.681116	-0.708824	-0.640759	-0.649598	-0.6824	-0.622926	-0.62166	-0.632728	-0.618088	-0.578271	-0.544157	-0.525427	-0.746857	-0.744846	-0.729537	-0.721406	-0.722336	-0.752966	-0.735921	-0.777118	-0.759562
Succinyladenosine	-0.810223	-0.807308	-0.818261	-0.803926	-0.797412	-0.799905	-0.795087	-0.778792	-0.779331	-0.799571	-0.791309	-0.786201	-0.780321	-0.817381	-0.711981	-0.719153	-0.741505	-0.72363	-0.7227	-0.743282	-0.786355	-0.775196	-0.789417	-0.755297	-0.736081	-0.724881	-0.79445	-0.684208	-0.692926	-0.721402	-0.65172	-0.660227	-0.693524	-0.634501	-0.633148	-0.644591	-0.629965	-0.58882	-0.554241	-0.534186	-0.754052	-0.752046	-0.736364	-0.728052	-0.72959	-0.760961	-0.743663	-0.784592	-0.766523
3-methylsulfolene	-0.895124	-0.891108	-0.902823	-0.888721	-0.881229	-0.882267	-0.876502	-0.858074	-0.860446	-0.886496	-0.877516	-0.870921	-0.864794	-0.905603	-0.789911	-0.79637	-0.823091	-0.799837	-0.797458	-0.822307	-0.876175	-0.863317	-0.878005	-0.842148	-0.820844	-0.807104	-0.888353	-0.765398	-0.773214	-0.806113	-0.726652	-0.734253	-0.771118	-0.71104	-0.709274	-0.722759	-0.707483	-0.65908	-0.620989	-0.594708	-0.818968	-0.816881	-0.798965	-0.789535	-0.793556	-0.829384	-0.810247	-0.852084	-0.831111
N-acetyl-l-methionine	-0.920975	-0.917305	-0.929583	-0.914066	-0.906529	-0.908594	-0.902918	-0.884206	-0.885615	-0.910275	-0.90095	-0.894717	-0.888199	-0.930264	-0.810795	-0.81829	-0.844606	-0.822716	-0.821053	-0.845394	-0.897171	-0.88425	-0.899956	-0.861996	-0.84012	-0.826776	-0.907823	-0.781991	-0.791087	-0.824101	-0.743783	-0.752647	-0.790531	-0.72574	-0.72408	-0.737465	-0.721236	-0.673145	-0.633889	-0.609244	-0.850805	-0.848583	-0.830492	-0.820933	-0.823722	-0.859906	-0.840232	-0.88524	-0.864248
Phosphonoacetate	-0.91795	-0.914047	-0.926164	-0.911235	-0.903631	-0.905159	-0.899366	-0.880583	-0.882536	-0.908256	-0.899008	-0.892501	-0.886118	-0.928004	-0.809159	-0.816177	-0.843033	-0.820131	-0.818056	-0.84297	-0.896518	-0.883476	-0.898814	-0.861547	-0.83972	-0.825998	-0.908135	-0.782358	-0.790862	-0.824213	-0.743393	-0.751672	-0.789456	-0.726463	-0.724726	-0.738327	-0.722424	-0.67358	-0.634488	-0.608648	-0.843653	-0.841478	-0.823264	-0.81366	-0.817157	-0.853584	-0.833966	-0.877781	-0.856546
D-(-)-3-phosphoglyceric acid	-0.939878	-0.936077	-0.94858	-0.932866	-0.925154	-0.927141	-0.921318	-0.902192	-0.903754	-0.929178	-0.919673	-0.913245	-0.906619	-0.949538	-0.827669	-0.835216	-0.862214	-0.839629	-0.837837	-0.862826	-0.916105	-0.902881	-0.918838	-0.880227	-0.857897	-0.844184	-0.927202	-0.798706	-0.807861	-0.841654	-0.759514	-0.768434	-0.807101	-0.741339	-0.739626	-0.753345	-0.736844	-0.68756	-0.647507	-0.622067	-0.867282	-0.865023	-0.84652	-0.836747	-0.839756	-0.876764	-0.856685	-0.90238	-0.880886
Acetyl-l-methionine	-0.944152	-0.940214	-0.952715	-0.937192	-0.929399	-0.931137	-0.925221	-0.905944	-0.907781	-0.933877	-0.92435	-0.91775	-0.911149	-0.954243	-0.831933	-0.839294	-0.86672	-0.843504	-0.841501	-0.866921	-0.921389	-0.908025	-0.9239	-0.885391	-0.862948	-0.848967	-0.933023	-0.803768	-0.812691	-0.846855	-0.763968	-0.772658	-0.811513	-0.746224	-0.744463	-0.758371	-0.741928	-0.691976	-0.651757	-0.62558	-0.869102	-0.866852	-0.848176	-0.838321	-0.841693	-0.879047	-0.858871	-0.904265	-0.882521
Anigorufone	-0.953267	-0.950319	-0.963439	-0.945524	-0.938038	-0.942009	-0.936608	-0.917694	-0.917252	-0.938836	-0.929027	-0.923591	-0.91645	-0.960134	-0.835671	-0.844996	-0.870068	-0.851156	-0.850879	-0.87382	-0.920698	-0.90789	-0.92524	-0.883984	-0.861421	-0.849069	-0.928267	-0.799263	-0.810618	-0.843252	-0.762767	-0.773862	-0.812989	-0.740444	-0.739016	-0.751969	-0.734227	-0.6876	-0.646848	-0.625747	-0.895705	-0.893266	-0.875173	-0.865543	-0.865948	-0.902151	-0.881815	-0.932014	-0.911366
Ethopabate	-0.971902	-0.969033	-0.982474	-0.963913	-0.956332	-0.960673	-0.955241	-0.93603	-0.935277	-0.956654	-0.946627	-0.941248	-0.933904	-0.978465	-0.851441	-0.861198	-0.886415	-0.867731	-0.867678	-0.890708	-0.937431	-0.924464	-0.942327	-0.899951	-0.87696	-0.864599	-0.944597	-0.813269	-0.825156	-0.858182	-0.776546	-0.788164	-0.828043	-0.753206	-0.751795	-0.764858	-0.746619	-0.699582	-0.658015	-0.637205	-0.915619	-0.91311	-0.894764	-0.884989	-0.885005	-0.921716	-0.900988	-0.952744	-0.931865
Adenosine cyclic 3',5'-monophosphate	-0.962264	-0.958934	-0.972006	-0.954695	-0.947007	-0.950251	-0.944601	-0.92532	-0.925666	-0.949096	-0.939259	-0.933349	-0.926305	-0.970341	-0.845039	-0.853799	-0.880011	-0.859359	-0.858477	-0.882574	-0.932693	-0.919528	-0.936586	-0.895759	-0.87295	-0.859873	-0.941774	-0.811035	-0.821689	-0.855272	-0.772923	-0.783322	-0.822854	-0.751909	-0.750347	-0.763798	-0.746282	-0.697901	-0.656815	-0.633678	-0.89788	-0.895476	-0.876949	-0.867118	-0.86856	-0.905626	-0.885087	-0.934254	-0.912961
(+)-castanospermine	-0.95968	-0.956183	-0.969134	-0.952254	-0.944521	-0.947376	-0.941643	-0.922318	-0.923058	-0.947245	-0.937468	-0.931362	-0.924419	-0.968307	-0.843509	-0.851919	-0.878512	-0.857136	-0.855957	-0.880458	-0.931838	-0.918591	-0.935375	-0.895067	-0.872303	-0.858957	-0.941613	-0.810968	-0.821189	-0.855002	-0.772323	-0.782295	-0.821739	-0.752125	-0.750506	-0.764108	-0.746836	-0.69793	-0.656979	-0.632987	-0.892335	-0.889966	-0.871357	-0.861498	-0.863453	-0.900679	-0.880189	-0.928472	-0.907012
(22e)-cholesta-4,6,8(14),22-tetraen-3-one	-0.913993	-0.911809	-0.924698	-0.906122	-0.899183	-0.904375	-0.899552	-0.88176	-0.879904	-0.897626	-0.888101	-0.883656	-0.876512	-0.918505	-0.798563	-0.808685	-0.831091	-0.815783	-0.816606	-0.836902	-0.876784	-0.864931	-0.882392	-0.841353	-0.81978	-0.809037	-0.881435	-0.758681	-0.771032	-0.801162	-0.725989	-0.738076	-0.775527	-0.701837	-0.700685	-0.712425	-0.694703	-0.652371	-0.613209	-0.596303	-0.870167	-0.867725	-0.850853	-0.84182	-0.840336	-0.874104	-0.854628	-0.905484	-0.886501
Diosgenin	-0.945793	-0.943706	-0.957128	-0.937528	-0.930412	-0.936157	-0.931263	-0.912945	-0.910638	-0.928174	-0.918285	-0.913893	-0.906419	-0.949903	-0.825624	-0.836417	-0.859161	-0.844083	-0.845229	-0.865773	-0.905676	-0.893526	-0.911816	-0.86895	-0.846642	-0.835823	-0.909785	-0.783012	-0.796188	-0.827053	-0.749804	-0.762702	-0.80144	-0.724069	-0.722937	-0.734901	-0.71637	-0.673207	-0.632658	-0.616061	-0.903509	-0.900954	-0.883624	-0.87433	-0.872289	-0.906978	-0.88683	-0.94019	-0.920767
Estradiol undecylate	-0.959523	-0.957358	-0.970951	-0.951172	-0.943935	-0.949659	-0.944667	-0.926057	-0.923824	-0.941839	-0.931815	-0.927301	-0.919742	-0.963848	-0.837811	-0.848672	-0.871869	-0.85636	-0.85744	-0.87841	-0.919273	-0.906915	-0.925409	-0.882031	-0.859395	-0.848336	-0.923638	-0.794954	-0.808212	-0.839611	-0.761091	-0.774068	-0.813372	-0.735189	-0.734024	-0.746213	-0.727467	-0.683499	-0.642367	-0.625279	-0.915771	-0.913187	-0.895569	-0.886126	-0.884196	-0.919459	-0.899017	-0.952947	-0.933181
Tranexamic acid	-0.93104	-0.928512	-0.941495	-0.923233	-0.916052	-0.920687	-0.915606	-0.897321	-0.896107	-0.915562	-0.905916	-0.901026	-0.893889	-0.936614	-0.814721	-0.824474	-0.848069	-0.831143	-0.831467	-0.852944	-0.89596	-0.883685	-0.901081	-0.859976	-0.837973	-0.82651	-0.901928	-0.776443	-0.788334	-0.819572	-0.742055	-0.753684	-0.791864	-0.71875	-0.717474	-0.729754	-0.712037	-0.667795	-0.627945	-0.609154	-0.881033	-0.878594	-0.861183	-0.851888	-0.851259	-0.886102	-0.866253	-0.916771	-0.89705
Elacytarabine	-0.950712	-0.948235	-0.961543	-0.942667	-0.935374	-0.940331	-0.935201	-0.916585	-0.915112	-0.934496	-0.924627	-0.919758	-0.912422	-0.956067	-0.8315	-0.841651	-0.865479	-0.848654	-0.849162	-0.870817	-0.91392	-0.901454	-0.919352	-0.877138	-0.854679	-0.843154	-0.91959	-0.791605	-0.803985	-0.835696	-0.756865	-0.768975	-0.807951	-0.732621	-0.731354	-0.743782	-0.725575	-0.680784	-0.640077	-0.621429	-0.901494	-0.898987	-0.881285	-0.871825	-0.87088	-0.906306	-0.88604	-0.938068	-0.918063
Acetylcarnitine	-0.95359	-0.950915	-0.964171	-0.945654	-0.938267	-0.942829	-0.937577	-0.918803	-0.917751	-0.938076	-0.928212	-0.923101	-0.915831	-0.959576	-0.834813	-0.844644	-0.869029	-0.851314	-0.8515	-0.873725	-0.918462	-0.905832	-0.923539	-0.881638	-0.859093	-0.847205	-0.924924	-0.796274	-0.808257	-0.840408	-0.760745	-0.772461	-0.811575	-0.737244	-0.735908	-0.748576	-0.730525	-0.684894	-0.64409	-0.624398	-0.900848	-0.898365	-0.880468	-0.87092	-0.870528	-0.906341	-0.886008	-0.937384	-0.917076
Succinic anhydride	-0.88671	-0.883372	-0.895286	-0.879923	-0.872738	-0.875146	-0.86979	-0.851878	-0.852799	-0.875641	-0.866627	-0.860858	-0.854492	-0.895025	-0.779816	-0.787391	-0.812233	-0.792014	-0.790743	-0.813663	-0.861978	-0.849667	-0.865038	-0.828041	-0.806997	-0.794484	-0.871442	-0.750576	-0.759777	-0.791211	-0.714487	-0.723461	-0.759916	-0.696281	-0.694749	-0.70743	-0.691589	-0.646008	-0.608185	-0.585465	-0.822599	-0.820427	-0.803154	-0.794011	-0.796129	-0.830681	-0.811745	-0.855905	-0.835941
2-methylthiazolidine	-0.90857	-0.905744	-0.91824	-0.901201	-0.894061	-0.89781	-0.892652	-0.874616	-0.874233	-0.894882	-0.885535	-0.880334	-0.873536	-0.915169	-0.796557	-0.805414	-0.829354	-0.811255	-0.810962	-0.832872	-0.877683	-0.865465	-0.88198	-0.842697	-0.82119	-0.809389	-0.884966	-0.761986	-0.772771	-0.803905	-0.727141	-0.737678	-0.774973	-0.705937	-0.70457	-0.716933	-0.700042	-0.655539	-0.6167	-0.596502	-0.853411	-0.85109	-0.833833	-0.82465	-0.825084	-0.859614	-0.840231	-0.888005	-0.868304
Seocalcitol	-0.91912	-0.915986	-0.928495	-0.911858	-0.904532	-0.907731	-0.902361	-0.883969	-0.884195	-0.906358	-0.896954	-0.891364	-0.884614	-0.926684	-0.806956	-0.815409	-0.840327	-0.820807	-0.820044	-0.842937	-0.89044	-0.877896	-0.894249	-0.855145	-0.833363	-0.820953	-0.898924	-0.774115	-0.784398	-0.81639	-0.737879	-0.747918	-0.785672	-0.717608	-0.716131	-0.728929	-0.712147	-0.666109	-0.626858	-0.605	-0.858449	-0.856145	-0.838483	-0.829108	-0.83035	-0.865685	-0.846068	-0.893229	-0.872949
Mfcd00010474	-0.85979	-0.857195	-0.869059	-0.852762	-0.846034	-0.849752	-0.844915	-0.82789	-0.827351	-0.846525	-0.837665	-0.832838	-0.826368	-0.865779	-0.753461	-0.761988	-0.784441	-0.767662	-0.767519	-0.788043	-0.829824	-0.818315	-0.834045	-0.796688	-0.776343	-0.765311	-0.836394	-0.720132	-0.730519	-0.759838	-0.687442	-0.697592	-0.732876	-0.667037	-0.66577	-0.677386	-0.661314	-0.619493	-0.582729	-0.564025	-0.808994	-0.806784	-0.790513	-0.781847	-0.782027	-0.814587	-0.796247	-0.841793	-0.82325
Adenosine	-0.858848	-0.856659	-0.868705	-0.851546	-0.844976	-0.849561	-0.844953	-0.828163	-0.826722	-0.844004	-0.835079	-0.83074	-0.82409	-0.863526	-0.750949	-0.76021	-0.78161	-0.766628	-0.767171	-0.786602	-0.82515	-0.813922	-0.830154	-0.791905	-0.771621	-0.761294	-0.830072	-0.714526	-0.725823	-0.75438	-0.68332	-0.694371	-0.729576	-0.661207	-0.660079	-0.671254	-0.654751	-0.614471	-0.577691	-0.561101	-0.81526	-0.812987	-0.797033	-0.788503	-0.787504	-0.819435	-0.801129	-0.84834	-0.83033
O-{[(2r)-3-(henicosanoyloxy)-2-hydroxypropoxy](hydroxy)phosphoryl}-l-serine	-0.850974	-0.848643	-0.8605	-0.843853	-0.837282	-0.841475	-0.836819	-0.820096	-0.819031	-0.836908	-0.828095	-0.823602	-0.817088	-0.856135	-0.744744	-0.753621	-0.775238	-0.759678	-0.759939	-0.779624	-0.819101	-0.807868	-0.823742	-0.78622	-0.766106	-0.755594	-0.824639	-0.709915	-0.720737	-0.749326	-0.678412	-0.688994	-0.723893	-0.657198	-0.656025	-0.66727	-0.651099	-0.610587	-0.574166	-0.556885	-0.804907	-0.802681	-0.786752	-0.778249	-0.777735	-0.809611	-0.791468	-0.837555	-0.819504
Inosinic acid	-0.880058	-0.877303	-0.889398	-0.872934	-0.86601	-0.869603	-0.864596	-0.847117	-0.846786	-0.866872	-0.857821	-0.852762	-0.846186	-0.886509	-0.771637	-0.780182	-0.803417	-0.785806	-0.785492	-0.806762	-0.850311	-0.838464	-0.854437	-0.816429	-0.795595	-0.784133	-0.857438	-0.738291	-0.748696	-0.778886	-0.704474	-0.71464	-0.750766	-0.684014	-0.682683	-0.694678	-0.678337	-0.635163	-0.597546	-0.577888	-0.826308	-0.824062	-0.807333	-0.798433	-0.798906	-0.832379	-0.813604	-0.859802	-0.840696
N-[3-carboxy-2-(carboxymethyl)-2-hydroxypropanoyl]glutamic acid	-0.888916	-0.886062	-0.898244	-0.881769	-0.87475	-0.878224	-0.873128	-0.855435	-0.85526	-0.875878	-0.866751	-0.861555	-0.854945	-0.895662	-0.779702	-0.788202	-0.811852	-0.793749	-0.79331	-0.814984	-0.859535	-0.847521	-0.863564	-0.825338	-0.804288	-0.792588	-0.867025	-0.746574	-0.756921	-0.787544	-0.712161	-0.722268	-0.758764	-0.6918	-0.690432	-0.702623	-0.686197	-0.642324	-0.604339	-0.584112	-0.83336	-0.831103	-0.814153	-0.80514	-0.805827	-0.839742	-0.820775	-0.867135	-0.847746
Inosine 5'-phosphate	-0.898244	-0.895744	-0.908241	-0.890754	-0.883804	-0.888145	-0.883209	-0.865536	-0.8645	-0.883551	-0.874256	-0.869466	-0.862608	-0.903818	-0.786276	-0.795574	-0.818492	-0.801895	-0.802105	-0.822986	-0.864966	-0.853082	-0.869788	-0.830272	-0.809037	-0.797874	-0.87097	-0.749817	-0.76115	-0.791398	-0.716423	-0.727505	-0.764346	-0.694199	-0.692947	-0.704858	-0.687833	-0.644925	-0.606487	-0.588043	-0.848923	-0.84658	-0.829738	-0.82075	-0.820321	-0.854026	-0.834874	-0.883355	-0.864251
(5z,8z,11z,14z)-n-(2-methoxyethyl)-16,16-dimethyl-5,8,11,14-docosatetraenamide	-0.877797	-0.875393	-0.887624	-0.870452	-0.863674	-0.867998	-0.863196	-0.845945	-0.844847	-0.863288	-0.854197	-0.849562	-0.842842	-0.88312	-0.768218	-0.777375	-0.799674	-0.783623	-0.783893	-0.804198	-0.84492	-0.833332	-0.849707	-0.811001	-0.790254	-0.779411	-0.850632	-0.732292	-0.743455	-0.772945	-0.699796	-0.710712	-0.74671	-0.677913	-0.676703	-0.688303	-0.671622	-0.629833	-0.592264	-0.574439	-0.830278	-0.827982	-0.811551	-0.80278	-0.802249	-0.835131	-0.816415	-0.863955	-0.845335
Chloropyramine	-0.878429	-0.875872	-0.888038	-0.871183	-0.864344	-0.868347	-0.863457	-0.846113	-0.845351	-0.864505	-0.855436	-0.850617	-0.843963	-0.884244	-0.769402	-0.778287	-0.800987	-0.784259	-0.784273	-0.804993	-0.846936	-0.83524	-0.851432	-0.813048	-0.792271	-0.781161	-0.853266	-0.734621	-0.745447	-0.775232	-0.701559	-0.712142	-0.748182	-0.680309	-0.679046	-0.690814	-0.674289	-0.63191	-0.594336	-0.575715	-0.8282	-0.825927	-0.809372	-0.800548	-0.800457	-0.833584	-0.814851	-0.861783	-0.842958
L-glutathione (reduced)	-0.572645	-0.573432	-0.58255	-0.566214	-0.562667	-0.570565	-0.56874	-0.558745	-0.552771	-0.553893	-0.547525	-0.547314	-0.541839	-0.568513	-0.491328	-0.501637	-0.510189	-0.510084	-0.514257	-0.521266	-0.529248	-0.523257	-0.536966	-0.506277	-0.492963	-0.489929	-0.52341	-0.44964	-0.462294	-0.477275	-0.436885	-0.449322	-0.472571	-0.412518	-0.412529	-0.417602	-0.40411	-0.385564	-0.360725	-0.361298	-0.583347	-0.581467	-0.572496	-0.567507	-0.560291	-0.578282	-0.566151	-0.607164	-0.598006
N-methylanhalonine	-0.646555	-0.646347	-0.656111	-0.640057	-0.635645	-0.642199	-0.639529	-0.627658	-0.623361	-0.629707	-0.62272	-0.621172	-0.615499	-0.645431	-0.55932	-0.568941	-0.581388	-0.576443	-0.579294	-0.590111	-0.607777	-0.600282	-0.614351	-0.582234	-0.567098	-0.561792	-0.605638	-0.52075	-0.532536	-0.551433	-0.502417	-0.513984	-0.540343	-0.479603	-0.479243	-0.486132	-0.472114	-0.447116	-0.419225	-0.414191	-0.639221	-0.637276	-0.626333	-0.620359	-0.615411	-0.637335	-0.623602	-0.665252	-0.653521
Anilofos	-0.641869	-0.642429	-0.652494	-0.634884	-0.630789	-0.638948	-0.636724	-0.625349	-0.619371	-0.622118	-0.615039	-0.614419	-0.608431	-0.638276	-0.552064	-0.563027	-0.573432	-0.571899	-0.576031	-0.584738	-0.596223	-0.589293	-0.604246	-0.57059	-0.555636	-0.551684	-0.590984	-0.507829	-0.521279	-0.538652	-0.492379	-0.505593	-0.531685	-0.466444	-0.466348	-0.472374	-0.457607	-0.435629	-0.407833	-0.406809	-0.648171	-0.646115	-0.635821	-0.630129	-0.622979	-0.643617	-0.630009	-0.674615	-0.663942
N-acetylvaline	-0.62561	-0.625958	-0.635673	-0.61894	-0.614875	-0.622402	-0.620124	-0.608932	-0.603546	-0.607138	-0.600275	-0.599435	-0.59369	-0.622745	-0.538904	-0.549226	-0.55987	-0.557507	-0.561199	-0.570208	-0.58296	-0.576074	-0.590395	-0.558047	-0.543454	-0.539263	-0.578656	-0.497319	-0.509978	-0.527269	-0.481553	-0.493987	-0.519438	-0.457121	-0.45696	-0.463043	-0.448869	-0.426717	-0.399652	-0.397632	-0.628256	-0.626285	-0.616105	-0.610495	-0.604102	-0.624508	-0.611238	-0.653875	-0.643222
Glycerophosphoglycerol	-0.870403	-0.871638	-0.885517	-0.860601	-0.855224	-0.867313	-0.864561	-0.849391	-0.840222	-0.841744	-0.832057	-0.831783	-0.823443	-0.863995	-0.746638	-0.76238	-0.775278	-0.775294	-0.781703	-0.792251	-0.804072	-0.794991	-0.81588	-0.769141	-0.748909	-0.744365	-0.795036	-0.682966	-0.70229	-0.72499	-0.663721	-0.682714	-0.718049	-0.626515	-0.626545	-0.634213	-0.613662	-0.585619	-0.547859	-0.548936	-0.887371	-0.884507	-0.8709	-0.86333	-0.852246	-0.879534	-0.861097	-0.923603	-0.909734
(1s,2r)-1,2-dihydrodibenzo[b,d]thiophene-1,2-diol	-0.885107	-0.886446	-0.900599	-0.875081	-0.869645	-0.882117	-0.879364	-0.863982	-0.854473	-0.855637	-0.845771	-0.845592	-0.837072	-0.878323	-0.758905	-0.775066	-0.78797	-0.788351	-0.79501	-0.805517	-0.816883	-0.807704	-0.829052	-0.781333	-0.760766	-0.756287	-0.807358	-0.693516	-0.713355	-0.736288	-0.674243	-0.693744	-0.729667	-0.636052	-0.636112	-0.643821	-0.622831	-0.594622	-0.556212	-0.557736	-0.903829	-0.900903	-0.887128	-0.879456	-0.867943	-0.89557	-0.876824	-0.940738	-0.92674
L-serine o-phosphate	-0.89653	-0.897215	-0.911226	-0.886842	-0.881086	-0.892273	-0.889112	-0.873172	-0.865039	-0.869325	-0.859457	-0.858474	-0.850155	-0.891825	-0.7715	-0.786634	-0.801414	-0.798846	-0.804452	-0.816871	-0.833678	-0.823934	-0.844696	-0.79791	-0.777015	-0.771328	-0.826755	-0.710466	-0.729031	-0.753474	-0.688539	-0.706777	-0.743231	-0.652731	-0.652563	-0.661082	-0.640565	-0.609508	-0.570697	-0.568764	-0.903613	-0.900758	-0.886308	-0.878327	-0.868623	-0.897592	-0.878582	-0.940473	-0.925442
(e)-progabide	-0.91997	-0.920492	-0.934782	-0.910155	-0.904181	-0.915271	-0.911927	-0.895474	-0.887531	-0.892768	-0.882675	-0.88145	-0.872998	-0.915726	-0.792427	-0.807624	-0.82325	-0.819819	-0.825264	-0.838487	-0.857161	-0.847042	-0.868114	-0.820523	-0.799064	-0.792918	-0.850792	-0.731199	-0.749837	-0.775245	-0.70805	-0.726356	-0.763781	-0.67208	-0.671846	-0.680781	-0.659927	-0.627389	-0.587588	-0.584668	-0.924036	-0.921135	-0.906173	-0.897927	-0.888497	-0.918489	-0.898976	-0.961717	-0.946064
Carbutamide	-0.790574	-0.790903	-0.803125	-0.782222	-0.777044	-0.786316	-0.783376	-0.769173	-0.762615	-0.767668	-0.759017	-0.757822	-0.750614	-0.787312	-0.681469	-0.694308	-0.70804	-0.704566	-0.709042	-0.720722	-0.737713	-0.728937	-0.746892	-0.70627	-0.687819	-0.682332	-0.732725	-0.629779	-0.645523	-0.667573	-0.609457	-0.624919	-0.657092	-0.579059	-0.578817	-0.586622	-0.568834	-0.54043	-0.506244	-0.503115	-0.79195	-0.789477	-0.776531	-0.769408	-0.761652	-0.787602	-0.77083	-0.824238	-0.810635
L-(-)-methionine	-0.811381	-0.811401	-0.823791	-0.80303	-0.797598	-0.80643	-0.803236	-0.78849	-0.782468	-0.789124	-0.780304	-0.778699	-0.771448	-0.809059	-0.700729	-0.713322	-0.728224	-0.723261	-0.727316	-0.740144	-0.760087	-0.750869	-0.768888	-0.727931	-0.708964	-0.702788	-0.756257	-0.650139	-0.665573	-0.688778	-0.628144	-0.643297	-0.676348	-0.598307	-0.597951	-0.606296	-0.588392	-0.558066	-0.523025	-0.518169	-0.807172	-0.804686	-0.791163	-0.783754	-0.77672	-0.803819	-0.786595	-0.840061	-0.825697
Salsolinol	-0.769368	-0.770779	-0.783202	-0.76048	-0.755846	-0.767223	-0.764968	-0.75173	-0.742911	-0.742772	-0.73415	-0.734291	-0.72677	-0.762669	-0.658632	-0.673136	-0.683721	-0.685145	-0.691355	-0.69983	-0.707751	-0.699937	-0.718813	-0.67676	-0.658906	-0.655439	-0.698463	-0.599868	-0.61768	-0.637166	-0.584006	-0.601517	-0.632718	-0.549746	-0.549882	-0.55632	-0.5378	-0.514198	-0.480776	-0.483387	-0.790038	-0.787454	-0.775665	-0.769073	-0.758341	-0.781991	-0.765705	-0.822316	-0.810463
Acetanilide	-0.803017	-0.80473	-0.817811	-0.793575	-0.788827	-0.801216	-0.798995	-0.785305	-0.775567	-0.774317	-0.765274	-0.765706	-0.757746	-0.795255	-0.686442	-0.70202	-0.71246	-0.714998	-0.721883	-0.730097	-0.736481	-0.728484	-0.748493	-0.704049	-0.685437	-0.682227	-0.725817	-0.623258	-0.642393	-0.6623	-0.607558	-0.626374	-0.658916	-0.570777	-0.571	-0.577467	-0.557872	-0.534121	-0.499204	-0.503166	-0.828819	-0.826083	-0.813955	-0.807149	-0.795252	-0.819585	-0.802595	-0.862695	-0.850627
N-acetylneuraminic acid	-0.799754	-0.801219	-0.814131	-0.790518	-0.7857	-0.79752	-0.795174	-0.781412	-0.77225	-0.772119	-0.763157	-0.7633	-0.755484	-0.7928	-0.684656	-0.699729	-0.710739	-0.712207	-0.718657	-0.727474	-0.735729	-0.727606	-0.747223	-0.703516	-0.684957	-0.681348	-0.726086	-0.623594	-0.642102	-0.662363	-0.607095	-0.625292	-0.657725	-0.571493	-0.571634	-0.578329	-0.55908	-0.534536	-0.499795	-0.502494	-0.821192	-0.818507	-0.80625	-0.799396	-0.788249	-0.812837	-0.795907	-0.854742	-0.842418
Nicotinamide adenine dinucleotide (nad+)	-0.790733	-0.791543	-0.804001	-0.782045	-0.777045	-0.787356	-0.784682	-0.770734	-0.7631	-0.765927	-0.757184	-0.756563	-0.749131	-0.785918	-0.679598	-0.693325	-0.705836	-0.704478	-0.709772	-0.72018	-0.733379	-0.724921	-0.743498	-0.701757	-0.683347	-0.678684	-0.726436	-0.62417	-0.641014	-0.6622	-0.605569	-0.62212	-0.654251	-0.573104	-0.573025	-0.580321	-0.561997	-0.535368	-0.501107	-0.50047	-0.800628	-0.798077	-0.785484	-0.77851	-0.76935	-0.794598	-0.777838	-0.8333	-0.820304
[similar to: l-tyrosine; 未mass: -0.1194 da]	-0.831087	-0.832219	-0.845448	-0.821759	-0.816608	-0.828051	-0.825397	-0.810886	-0.802237	-0.803907	-0.794666	-0.794349	-0.786407	-0.825119	-0.713108	-0.728052	-0.740487	-0.740296	-0.746336	-0.756532	-0.768188	-0.759486	-0.779372	-0.734853	-0.715529	-0.71111	-0.759751	-0.652675	-0.671019	-0.692778	-0.634132	-0.652161	-0.685904	-0.598806	-0.598819	-0.606191	-0.58662	-0.559671	-0.523623	-0.524408	-0.846458	-0.843731	-0.830704	-0.823461	-0.813015	-0.839139	-0.821533	-0.881017	-0.867715
L-proline	-0.837043	-0.837967	-0.851186	-0.827799	-0.822531	-0.833589	-0.830796	-0.816067	-0.807837	-0.810521	-0.801254	-0.800676	-0.792778	-0.831731	-0.719121	-0.733775	-0.746849	-0.745704	-0.751422	-0.762263	-0.775709	-0.766801	-0.78655	-0.742212	-0.72273	-0.717908	-0.768089	-0.659931	-0.677913	-0.700219	-0.640479	-0.658149	-0.692156	-0.605827	-0.605767	-0.61342	-0.593948	-0.566006	-0.52973	-0.5294	-0.848697	-0.845985	-0.832704	-0.825342	-0.815451	-0.84208	-0.824341	-0.883333	-0.869662
[similar to: diosgenin; 未mass: -215.1541 da]	-0.819483	-0.818787	-0.830954	-0.811548	-0.805795	-0.81317	-0.809547	-0.79427	-0.789788	-0.799831	-0.791057	-0.788579	-0.781588	-0.819453	-0.710719	-0.722118	-0.738994	-0.730825	-0.733705	-0.74856	-0.774358	-0.764571	-0.781849	-0.742138	-0.722914	-0.715448	-0.773402	-0.665179	-0.679133	-0.703865	-0.640394	-0.65408	-0.687533	-0.61333	-0.612727	-0.621916	-0.604627	-0.571345	-0.536055	-0.527436	-0.80254	-0.800145	-0.785955	-0.778248	-0.773236	-0.801658	-0.784238	-0.835194	-0.819777
Pentalinonsterol	-0.806483	-0.805585	-0.817456	-0.798821	-0.793081	-0.799881	-0.796197	-0.781048	-0.777112	-0.787981	-0.779385	-0.776693	-0.769912	-0.807139	-0.700332	-0.711159	-0.728308	-0.719333	-0.721806	-0.736989	-0.764056	-0.754282	-0.771012	-0.732423	-0.713484	-0.705771	-0.763978	-0.657163	-0.67041	-0.695134	-0.632008	-0.644997	-0.67794	-0.606285	-0.605619	-0.614887	-0.598109	-0.564567	-0.529867	-0.520283	-0.786042	-0.78372	-0.769597	-0.761947	-0.757634	-0.785918	-0.768767	-0.818012	-0.802569
Monolinuron	-0.807002	-0.805933	-0.817729	-0.799454	-0.793647	-0.800083	-0.796301	-0.781052	-0.777495	-0.789162	-0.780592	-0.777694	-0.770988	-0.808211	-0.701496	-0.712015	-0.729611	-0.719878	-0.722063	-0.737707	-0.76614	-0.756246	-0.772767	-0.734548	-0.715581	-0.70757	-0.766756	-0.659623	-0.672489	-0.697538	-0.63384	-0.646451	-0.679433	-0.608832	-0.608108	-0.617563	-0.600963	-0.566767	-0.532068	-0.521593	-0.783523	-0.781227	-0.766968	-0.75926	-0.755443	-0.783996	-0.766828	-0.815379	-0.79971
Sulfacetamide	-0.796617	-0.795191	-0.806656	-0.789424	-0.783554	-0.789108	-0.78517	-0.769919	-0.767235	-0.780468	-0.772078	-0.768774	-0.762326	-0.799007	-0.694016	-0.703718	-0.72203	-0.710791	-0.712319	-0.728744	-0.759735	-0.749722	-0.765554	-0.728682	-0.709924	-0.701381	-0.761848	-0.655554	-0.667409	-0.692805	-0.628774	-0.640386	-0.67298	-0.605676	-0.604835	-0.61456	-0.598585	-0.563458	-0.529258	-0.516997	-0.766878	-0.764672	-0.750321	-0.742597	-0.73991	-0.76864	-0.751681	-0.798034	-0.782095
Choline	-0.845279	-0.843366	-0.855338	-0.837926	-0.831548	-0.836579	-0.832178	-0.815781	-0.813826	-0.829722	-0.820893	-0.81691	-0.810253	-0.849107	-0.738081	-0.747639	-0.768089	-0.754401	-0.755344	-0.773832	-0.809874	-0.798983	-0.815268	-0.777068	-0.757127	-0.747375	-0.813742	-0.700371	-0.712038	-0.739709	-0.67052	-0.681939	-0.716564	-0.647726	-0.646698	-0.657442	-0.640934	-0.60218	-0.565946	-0.550864	-0.806636	-0.80436	-0.788836	-0.780516	-0.778832	-0.809905	-0.791896	-0.839382	-0.821961
Hypoxanthine	-0.828515	-0.827002	-0.838912	-0.821055	-0.814939	-0.820651	-0.816538	-0.800661	-0.797936	-0.811838	-0.803117	-0.799645	-0.792953	-0.831097	-0.721931	-0.731966	-0.751088	-0.739267	-0.740805	-0.757967	-0.790435	-0.780001	-0.796429	-0.758149	-0.738638	-0.729701	-0.792754	-0.68216	-0.694422	-0.720889	-0.6542	-0.666211	-0.700113	-0.630306	-0.629421	-0.639568	-0.622986	-0.586341	-0.550776	-0.53787	-0.797056	-0.794766	-0.779819	-0.771776	-0.769069	-0.798993	-0.781354	-0.829436	-0.812821
Dihydrothymine	-0.83729	-0.83561	-0.847573	-0.829856	-0.823619	-0.829067	-0.824827	-0.808701	-0.806283	-0.82103	-0.812244	-0.808556	-0.801862	-0.840386	-0.730205	-0.740069	-0.759777	-0.747168	-0.748467	-0.76621	-0.800209	-0.789565	-0.805973	-0.767636	-0.747904	-0.738614	-0.803165	-0.69118	-0.703228	-0.730248	-0.662385	-0.674182	-0.708458	-0.638882	-0.637936	-0.64835	-0.631759	-0.59417	-0.558249	-0.544426	-0.802831	-0.800542	-0.785325	-0.777149	-0.774853	-0.805315	-0.787484	-0.835436	-0.818454
5-(4-acetoxy-1-butynyl)-2,2芒鈧?bithienyl	-0.826919	-0.825239	-0.837044	-0.819592	-0.813424	-0.818759	-0.814561	-0.798623	-0.796282	-0.810942	-0.80227	-0.798602	-0.792001	-0.830044	-0.721248	-0.730951	-0.750468	-0.737923	-0.739171	-0.756749	-0.790492	-0.779966	-0.796144	-0.75833	-0.73884	-0.72963	-0.793496	-0.682868	-0.694719	-0.721442	-0.654354	-0.665958	-0.699812	-0.631232	-0.630291	-0.640598	-0.624236	-0.587035	-0.551562	-0.537802	-0.792517	-0.790259	-0.775215	-0.767135	-0.764927	-0.795043	-0.777432	-0.824702	-0.807904
1-(4-methoxyphenyl)-3-pentanyl hydrogen sulfate	-0.822312	-0.820541	-0.832232	-0.815095	-0.808925	-0.814014	-0.809783	-0.793881	-0.791776	-0.80682	-0.798214	-0.794447	-0.787929	-0.825743	-0.717648	-0.727113	-0.746776	-0.73386	-0.734931	-0.752676	-0.787023	-0.776488	-0.792447	-0.755076	-0.735685	-0.726354	-0.790417	-0.680259	-0.691815	-0.718571	-0.651545	-0.662858	-0.696533	-0.628981	-0.628011	-0.638367	-0.622207	-0.584842	-0.54958	-0.535378	-0.786327	-0.784098	-0.769063	-0.760996	-0.759094	-0.789189	-0.771673	-0.818253	-0.801422
[similar to: microcystin-lr ; 未mass: -428.8014 da]	-0.848683	-0.848666	-0.861607	-0.839976	-0.834279	-0.843433	-0.840071	-0.824626	-0.818414	-0.825557	-0.816339	-0.814613	-0.807048	-0.84638	-0.733107	-0.746207	-0.761894	-0.756531	-0.760707	-0.774228	-0.795395	-0.785727	-0.804524	-0.761774	-0.741932	-0.735405	-0.791547	-0.680494	-0.696548	-0.72089	-0.657348	-0.673109	-0.707683	-0.626305	-0.62592	-0.63469	-0.616006	-0.584141	-0.547495	-0.542214	-0.843592	-0.840997	-0.826824	-0.819062	-0.811819	-0.840221	-0.822203	-0.877962	-0.862888
Dasolampanel	-0.897845	-0.897568	-0.911133	-0.888814	-0.882691	-0.891817	-0.888116	-0.871638	-0.865645	-0.874401	-0.864697	-0.862562	-0.854678	-0.896245	-0.776656	-0.790038	-0.807292	-0.800478	-0.804457	-0.819447	-0.843884	-0.833484	-0.853037	-0.808409	-0.787393	-0.780044	-0.840866	-0.723002	-0.739396	-0.765616	-0.697587	-0.713676	-0.750279	-0.665856	-0.66536	-0.674913	-0.655434	-0.620764	-0.582031	-0.575102	-0.887871	-0.885169	-0.869982	-0.86169	-0.854783	-0.88521	-0.86614	-0.924029	-0.907753
Cytidine 5'-monophosphate (hydrate)	-0.85393	-0.8532	-0.865877	-0.845664	-0.839668	-0.847344	-0.843566	-0.827645	-0.822984	-0.833469	-0.824326	-0.821739	-0.814456	-0.853912	-0.740612	-0.752482	-0.770078	-0.761548	-0.764542	-0.780032	-0.806947	-0.796746	-0.814744	-0.773374	-0.753342	-0.745554	-0.805967	-0.69319	-0.70772	-0.7335	-0.667348	-0.6816	-0.716459	-0.639165	-0.638534	-0.648114	-0.630103	-0.595406	-0.558633	-0.549631	-0.8362	-0.833705	-0.818916	-0.810884	-0.805673	-0.835296	-0.817144	-0.870224	-0.854153
D-ornithine	-0.859604	-0.858687	-0.871359	-0.85141	-0.845306	-0.85264	-0.848735	-0.832611	-0.828326	-0.839727	-0.830557	-0.827735	-0.820488	-0.860175	-0.746295	-0.757908	-0.776086	-0.766695	-0.769399	-0.785475	-0.814011	-0.80362	-0.821503	-0.78028	-0.760098	-0.751945	-0.813766	-0.699973	-0.714184	-0.740464	-0.673305	-0.687239	-0.722348	-0.645716	-0.64502	-0.654856	-0.636929	-0.601325	-0.564334	-0.554325	-0.838523	-0.836041	-0.821018	-0.812876	-0.808163	-0.838251	-0.819972	-0.87263	-0.85622
C17 sphingosine	-0.888109	-0.886998	-0.900012	-0.879757	-0.87339	-0.880616	-0.876491	-0.859745	-0.855682	-0.868215	-0.858771	-0.855661	-0.84825	-0.889225	-0.771723	-0.783421	-0.802616	-0.792197	-0.794714	-0.811755	-0.842522	-0.831678	-0.849945	-0.807731	-0.786864	-0.778162	-0.842931	-0.725127	-0.739437	-0.766884	-0.696991	-0.711019	-0.747309	-0.669185	-0.66841	-0.678745	-0.660404	-0.623017	-0.584821	-0.573637	-0.863444	-0.860907	-0.845264	-0.836802	-0.832408	-0.863733	-0.844842	-0.898554	-0.881394
Urochloralic acid	-0.895407	-0.894323	-0.90746	-0.886962	-0.880556	-0.887916	-0.883777	-0.866912	-0.862738	-0.875213	-0.865685	-0.862591	-0.855103	-0.89642	-0.77792	-0.789778	-0.809042	-0.79869	-0.801287	-0.818376	-0.849122	-0.838213	-0.856674	-0.814033	-0.792998	-0.784283	-0.849393	-0.730672	-0.745179	-0.772788	-0.702429	-0.716651	-0.753236	-0.674246	-0.673477	-0.68386	-0.665329	-0.627763	-0.589249	-0.578153	-0.871155	-0.868591	-0.852846	-0.844325	-0.839793	-0.871325	-0.85228	-0.906581	-0.889324
Protopanaxadiol	-0.892458	-0.891691	-0.904938	-0.883822	-0.877554	-0.885567	-0.881616	-0.864974	-0.860113	-0.871091	-0.861537	-0.858828	-0.851219	-0.892454	-0.774046	-0.786444	-0.804845	-0.79591	-0.799031	-0.815232	-0.843397	-0.832733	-0.851537	-0.808311	-0.787375	-0.779228	-0.842391	-0.724519	-0.739695	-0.766645	-0.697495	-0.71238	-0.748813	-0.668059	-0.667399	-0.677415	-0.658597	-0.622318	-0.583887	-0.574455	-0.87385	-0.871243	-0.855783	-0.847387	-0.841954	-0.872921	-0.853949	-0.909405	-0.892604
3-sulfolactic acid	-0.911514	-0.9107	-0.924215	-0.902715	-0.896302	-0.90442	-0.900368	-0.883354	-0.878457	-0.889811	-0.880058	-0.877255	-0.869498	-0.911608	-0.790701	-0.803307	-0.822179	-0.812919	-0.816055	-0.832683	-0.86169	-0.850777	-0.869944	-0.825865	-0.804479	-0.796106	-0.860786	-0.740353	-0.755783	-0.783364	-0.712643	-0.727776	-0.76499	-0.682708	-0.682024	-0.692286	-0.6731	-0.635934	-0.596686	-0.586895	-0.891969	-0.889312	-0.873499	-0.864915	-0.859454	-0.891127	-0.871749	-0.92826	-0.911061
4-hydroxy-3-(sulfooxy)benzoic acid	-0.911666	-0.91069	-0.924128	-0.902979	-0.896504	-0.904274	-0.900131	-0.883027	-0.878492	-0.8906	-0.880875	-0.877878	-0.870194	-0.912284	-0.79151	-0.80382	-0.823108	-0.813132	-0.815993	-0.833054	-0.863346	-0.852324	-0.871285	-0.827574	-0.806169	-0.797516	-0.863102	-0.742412	-0.757474	-0.785353	-0.714115	-0.728885	-0.766121	-0.684872	-0.684132	-0.694568	-0.675558	-0.637785	-0.598553	-0.58792	-0.889243	-0.886611	-0.870675	-0.862039	-0.857052	-0.888968	-0.869581	-0.925412	-0.908004
Phosphoaspartate	-0.884695	-0.883157	-0.895912	-0.876675	-0.870173	-0.87644	-0.872092	-0.85518	-0.852096	-0.866579	-0.857252	-0.853638	-0.846455	-0.8872	-0.770557	-0.781416	-0.801636	-0.789357	-0.791133	-0.809251	-0.843304	-0.832215	-0.849857	-0.808802	-0.787974	-0.778565	-0.845464	-0.727484	-0.740755	-0.768876	-0.697909	-0.71091	-0.747103	-0.672059	-0.671141	-0.681893	-0.6641	-0.62526	-0.587272	-0.573895	-0.852485	-0.850027	-0.834125	-0.825561	-0.822442	-0.854281	-0.835448	-0.887122	-0.86948
Betulin	-0.894479	-0.89304	-0.905992	-0.88629	-0.879759	-0.886344	-0.882012	-0.864974	-0.861599	-0.875708	-0.866257	-0.862741	-0.855425	-0.89664	-0.778598	-0.78979	-0.80994	-0.798032	-0.800023	-0.818036	-0.851557	-0.840422	-0.858407	-0.816632	-0.795585	-0.78627	-0.853273	-0.734157	-0.747837	-0.776061	-0.704667	-0.718072	-0.754654	-0.678038	-0.677149	-0.687898	-0.66978	-0.630937	-0.592513	-0.579585	-0.863953	-0.861449	-0.845456	-0.836833	-0.833344	-0.865366	-0.846328	-0.899063	-0.881372
(2r)-3-({[(2s)-2,3-dihydroxypropoxy](hydroxy)phosphoryl}oxy)-2-{[(5e)-4,7-dioxo-5-heptenoyl]oxy}propyl palmitate	-0.883662	-0.881859	-0.894469	-0.875838	-0.869244	-0.874927	-0.870435	-0.853399	-0.850917	-0.866624	-0.857358	-0.853428	-0.846378	-0.88703	-0.770776	-0.78113	-0.802008	-0.788564	-0.789883	-0.80869	-0.844817	-0.833563	-0.85084	-0.810451	-0.789623	-0.779765	-0.848063	-0.729831	-0.742475	-0.771047	-0.699329	-0.71171	-0.747887	-0.674657	-0.673649	-0.684672	-0.667197	-0.627411	-0.589505	-0.574755	-0.846746	-0.844334	-0.828252	-0.819614	-0.81728	-0.849476	-0.830656	-0.881132	-0.863171
2,3,4,9-tetrahydro-1h-beta-carboline-1,3-dicarboxylic acid	-0.888528	-0.886714	-0.899394	-0.880661	-0.874031	-0.879743	-0.875226	-0.858096	-0.855602	-0.871398	-0.862081	-0.858129	-0.851041	-0.891916	-0.775023	-0.785432	-0.806427	-0.792906	-0.794231	-0.813143	-0.849475	-0.838158	-0.855529	-0.81492	-0.793977	-0.784064	-0.852741	-0.733857	-0.746569	-0.775301	-0.703185	-0.715633	-0.75201	-0.678381	-0.677366	-0.688451	-0.67088	-0.630873	-0.592758	-0.577924	-0.851396	-0.848972	-0.8328	-0.824115	-0.82177	-0.854144	-0.83522	-0.885971	-0.86791
Hepes	-0.949391	-0.948021	-0.961844	-0.94059	-0.933716	-0.941045	-0.936534	-0.918534	-0.9146	-0.928848	-0.918787	-0.915243	-0.907405	-0.951177	-0.82574	-0.837908	-0.858894	-0.846948	-0.849328	-0.868031	-0.902369	-0.890655	-0.909946	-0.865243	-0.842919	-0.833301	-0.903551	-0.777352	-0.79223	-0.821903	-0.746615	-0.761198	-0.80001	-0.717678	-0.716787	-0.72803	-0.708626	-0.66798	-0.627174	-0.614268	-0.919775	-0.917092	-0.900234	-0.891131	-0.886969	-0.920725	-0.900525	-0.957164	-0.938587
1-o-phosphonopentitol	-0.940604	-0.939203	-0.952877	-0.931914	-0.925088	-0.932256	-0.927763	-0.909907	-0.906105	-0.92042	-0.91046	-0.906898	-0.899153	-0.942512	-0.818276	-0.830253	-0.851154	-0.83913	-0.841414	-0.860058	-0.894417	-0.882783	-0.901841	-0.857651	-0.835529	-0.825927	-0.895763	-0.770669	-0.785312	-0.814787	-0.740063	-0.754414	-0.792871	-0.711577	-0.71068	-0.721864	-0.702688	-0.662259	-0.621837	-0.608827	-0.910501	-0.90785	-0.891116	-0.882084	-0.878085	-0.911593	-0.891577	-0.94751	-0.92905
O-{hydroxy[(2r)-2-hydroxy-3-{[(6z)-2-methoxy-6-octadecen-1-yl]oxy}propoxy]phosphoryl}-l-serine	-0.941106	-0.939656	-0.953315	-0.932446	-0.925598	-0.932666	-0.928143	-0.910251	-0.906556	-0.921103	-0.911147	-0.907525	-0.899798	-0.943172	-0.818916	-0.830809	-0.851846	-0.839601	-0.841805	-0.860587	-0.895347	-0.883675	-0.90268	-0.858578	-0.83644	-0.82675	-0.896891	-0.771659	-0.786199	-0.815778	-0.740863	-0.755112	-0.793594	-0.71257	-0.711656	-0.722897	-0.703764	-0.663134	-0.622698	-0.60943	-0.910129	-0.907484	-0.890705	-0.881653	-0.877794	-0.91139	-0.891363	-0.94712	-0.928588
Calicoferol e	-0.916292	-0.914635	-0.927815	-0.90803	-0.901272	-0.907625	-0.903086	-0.885535	-0.882484	-0.897781	-0.888133	-0.884314	-0.876905	-0.919093	-0.798345	-0.809474	-0.830579	-0.81758	-0.81931	-0.838245	-0.874021	-0.862493	-0.880683	-0.838309	-0.816732	-0.806877	-0.876518	-0.754232	-0.76783	-0.797072	-0.72337	-0.73669	-0.774182	-0.696872	-0.695899	-0.707103	-0.688746	-0.648281	-0.608945	-0.594758	-0.881796	-0.87926	-0.862742	-0.853852	-0.850809	-0.883879	-0.864372	-0.917619	-0.899265
Lupenone	-0.911127	-0.909838	-0.923117	-0.902662	-0.896075	-0.903166	-0.898852	-0.881591	-0.877757	-0.891307	-0.881647	-0.878277	-0.870743	-0.912755	-0.792349	-0.804075	-0.824148	-0.8128	-0.815129	-0.833008	-0.865752	-0.854528	-0.873076	-0.830113	-0.808692	-0.799507	-0.866779	-0.745705	-0.760044	-0.788473	-0.716302	-0.730357	-0.767602	-0.688417	-0.687571	-0.698333	-0.679681	-0.640772	-0.601608	-0.589359	-0.883175	-0.880596	-0.864437	-0.855709	-0.851637	-0.883994	-0.864609	-0.919078	-0.901283
Dehydrosiphonochalynol	-0.922734	-0.921515	-0.935005	-0.914101	-0.907463	-0.91483	-0.910508	-0.893074	-0.888998	-0.902321	-0.892521	-0.889212	-0.881542	-0.924104	-0.802082	-0.814116	-0.834225	-0.823114	-0.825619	-0.843496	-0.875976	-0.864666	-0.883561	-0.839852	-0.818165	-0.809012	-0.876664	-0.754173	-0.768893	-0.797527	-0.724707	-0.739135	-0.776846	-0.696096	-0.695269	-0.706075	-0.687091	-0.648006	-0.60833	-0.596373	-0.895957	-0.893331	-0.87703	-0.868218	-0.863842	-0.896484	-0.876854	-0.932385	-0.914473
(1r,3s,5z)-5-[(2e)-2-{(1r,3as,7ar)-1-[(2r,3e,5e)-7-hydroxy-7-propyl-3,5-decadien-2-yl]-7a-methyloctahydro-4h-inden-4-ylidene}ethylidene]-4-methylene-1,3-cyclohexanediol	-0.915669	-0.914439	-0.927815	-0.907117	-0.900521	-0.907787	-0.903487	-0.886175	-0.882177	-0.895495	-0.885775	-0.882465	-0.874864	-0.917096	-0.796028	-0.807932	-0.827941	-0.816822	-0.819272	-0.837068	-0.869465	-0.858228	-0.876952	-0.833625	-0.812102	-0.802983	-0.870234	-0.74865	-0.763209	-0.791662	-0.719333	-0.733604	-0.771029	-0.691032	-0.690204	-0.70095	-0.682134	-0.64327	-0.603901	-0.591927	-0.888725	-0.886122	-0.869931	-0.861179	-0.856898	-0.889321	-0.869841	-0.924857	-0.907056
2,3-bisphospho-d-glyceric acid	-0.918081	-0.916819	-0.930218	-0.909526	-0.902902	-0.910127	-0.9058	-0.888428	-0.884482	-0.897963	-0.888222	-0.884871	-0.877263	-0.919602	-0.798241	-0.810125	-0.830257	-0.818986	-0.821396	-0.839313	-0.872014	-0.860729	-0.879466	-0.83609	-0.814508	-0.805317	-0.872898	-0.750953	-0.765487	-0.794065	-0.72146	-0.735706	-0.773231	-0.693203	-0.692363	-0.703167	-0.684332	-0.645264	-0.605795	-0.593645	-0.890573	-0.887968	-0.871713	-0.86293	-0.858719	-0.891268	-0.871736	-0.926779	-0.908895
[truncated: 246 more columns]

## Sheet: Table S7
Table S7. Pathways jointly enriched by differential metabolites and differentially expressed proteins
Pathways	Hits	P value	FDR	Matched features
Cysteine and methionine metabolism	10	5.3663e-06	0.0010468	BHMT; MAT1A; cpd:C00065; cpd:C00073; cpd:C00022; cpd:C03082; cpd:C01005; cpd:C11499; cpd:C21016; cpd:C00197
Glycine, serine and threonine metabolism	9	6.325e-06	0.0010468	BHMT; cpd:C00114; cpd:C00197; cpd:C00300; cpd:C01005; cpd:C00037; cpd:C03082; cpd:C00065; cpd:C00022
Mineral absorption	8	3.8794e-05	0.0042802	FTL; TF; MT2A; SLC26A3; cpd:C00037; cpd:C00073; cpd:C00148; cpd:C00065
Complement and coagulation cascades	7	0.00016367	0.013544	PLG; C3; TYK2; C8A; A2M; C4A; VTN
AMPK signaling pathway	9	0.00024669	0.016331	STK11; cpd:C00003; SIRT1; cpd:C00022; AKT1S1; HNF4A; SCD; STRADA; GYG2
Central carbon metabolism in cancer	7	0.00091445	0.050447	cpd:C00022; cpd:C00025; cpd:C00197; cpd:C00065; cpd:C00037; cpd:C00073; cpd:C00148

## Sheet: Table S8
Table S8. Interference sequences targeting BHMT
SiRNA ID	Sequence (5'-3')
siRNA-1	F: GCAUCCUGGAACGGUUAAATT
	R: UUUAACCGUUCCAGGAUGCTT
siRNA-2	F: GCUGAUGAGGGAGAUGCUUTT
	R: AAGCAUCUCCCUCAUCAGCTT
siRNA-3	F: GGAAGGAAUACUGGGAGAATT
	R: UUCUCCCAGUAUUCCUUCCTT
Negative control	F: UUCUCCGAACGUGUCACGUTT
	R: ACGUGACACGUUCGGAGAATT

## Sheet: Table S9
Table S9. Primers used in qRT-PCR assays
Gene symbol	Sequence (5'-3')
BHMT	F: GTTGCAGAGAAAATATCCGGGC
	R: GACCTCTAACTGCTGCCGAA
GAPDH	F: ACATCATCCCTGCTTCTACTGG
	R: CTCGGACGCCTGCTTCAC
PEDV M	F: AGGTCTGCATTCCAGTGCTT
	R: GGACATAGAAAGCCCAACCA
